# Supplementary material for: Hyperchylomicronemia causes endothelial cell inflammation and increases atherosclerosis
Source: Research Square preprint supplement (doi:10.21203/rs.3.rs-5451391/v1), 2024-11-24
Supplement: Supplementary file 1 [file 27532dd6cf4f331c125ca346.xlsx]

## Sheet: IPA_All_ACs
Ingenuity Canonical Pathways	-log(p-value)	Ratio	z-score	Molecules
Neutrophil degranulation	8.28	0.0525	-1.8	ADGRE5,ARHGAP9,CCT8,CD68,CLEC5A,COMMD3,CTSC,CTSZ,CYBA,CYBB,DERA,FCER1G,FTH1,GM2A,ITGAV,LGALS3,LYZ,PLEKHO2,PRDX6,PSAP,PTPRJ,QSOX1,TUBB,TYROBP,XRCC6
Fc Epsilon RI Signaling	6.33	0.0932	0.302	BTK,FCER1G,FYN,INPP5D,INPP5K,LYN,PLCG1,PRKCQ,RAC2,RRAS2,SYK
TCR signaling	6.04	0.0873	1.508	CD3D,CD3E,CD3G,HLA-DQB1,INPP5D,ITK,LCK,PLCG1,PRKCQ,PTPRJ,ZAP70
DAP12 interactions	5.94	0.167	-0.378	BTK,CLEC5A,FYN,LCK,PLCG1,SYK,TYROBP
Primary Immunodeficiency Signaling	5.88	0.131	#NUM!	ADA,BTK,CD3D,CD3E,CD8A,IGKC,LCK,ZAP70
Sperm Motility	5.75	0.0584	1.342	BTK,Calm1 (includes others),FYN,HCK,ITK,LCK,LYN,NTRK3,PLCG1,PRDX6,PRKAG1,PRKCQ,SYK,TXK,ZAP70
IL-12 Signaling and Production in Macrophages	5.66	0.0614	1.069	APOE,Calm1 (includes others),CEBPA,FCGR2B,IGKC,IRF5,IRF8,LCK,LYZ,POU2F2,PPARG,PRKAG1,PRKCQ,XRCC6
Immunoregulatory interactions between a Lymphoid and a non-Lymphoid cell	5.52	0.0644	0.832	CD300C,CD3D,CD3E,CD3G,CD8A,CD8B,CD96,FCGR2B,IGKC,LILRB4,SH2D1A,SLAMF6,TYROBP
Fcγ Receptor-mediated Phagocytosis in Macrophages and Monocytes	5.38	0.0957	0.333	FYN,HCK,INPP5D,LYN,NCK2,PLCG1,PRKCQ,RAC2,SYK
IL-15 Production	5.27	0.0813	0.632	BTK,FYN,HCK,ITK,LCK,LYN,NTRK3,SYK,TXK,ZAP70
GPVI-mediated activation cascade	5.24	0.171	0	FCER1G,FYN,LCK,LYN,RAC2,SYK
Neutrophil Extracellular Trap Signaling Pathway	5.17	0.045	1.886	C1QB,CYBB,FYN,HCK,IGKC,LCK,LYN,NDUFA10,NDUFB11,NDUFV3,PLCG1,PRDX6,PRKCQ,RAC2,SLC25A4,SYK,TOMM20,UQCRC2
Costimulation by the CD28 family	5.07	0.103	0.707	CD3D,CD3E,CD3G,CD86,FYN,HLA-DQB1,LCK,LYN
Leukocyte Extravasation Signaling	4.99	0.0622	0.632	ARHGAP9,BTK,CYBA,CYBB,ITK,PLCG1,PRKCQ,RAC2,RAPGEF3,RAPGEF4,RHOH,TXK
ERK/MAPK Signaling	4.52	0.0558	2.121	ARAF,DUSP1,FYN,ITGAE,ITGAV,PLCG1,PPARG,PRKAG1,RAC2,RAPGEF3,RAPGEF4,RRAS2
Hepatic Fibrosis Signaling Pathway	4.37	0.0408	1.291	ARAF,Calm1 (includes others),CYBB,FTH1,IRAK3,ITGAE,ITGAV,MYL11,PLCG1,PPARG,PRKAG1,PRKCQ,RAC2,RHOH,RRAS2,SMO,Tcf7
GP6 Signaling Pathway	4.32	0.0709	-1.134	BTK,Calm1 (includes others),FCER1G,FYN,ITK,LYN,PLCG1,PRKCQ,SYK
Phagosome Formation	4.27	0.033	1.279	ADGRE5,ADGRG5,CCR7,CCR9,FCER1G,FCGR2B,FYN,HCK,IGKC,ITGAE,ITGAV,LCK,LYN,PLCG1,PRDX6,PRKCQ,RAC2,RAPGEF3,RAPGEF4,RRAS2,SMO,SYK,TBXA2R
Serotonin Receptor Signaling	4.26	0.0384	1.886	ADCY6,ARAF,Calm1 (includes others),CCR7,FYN,HCK,KCNJ6,LCK,LYN,PLCG1,PRDX6,PRKAG1,PRKCQ,RAC2,RAPGEF3,RHOH,RRAS2,TGM2
Natural Killer Cell Signaling	4.18	0.0556	1.508	FCER1G,FYN,LCK,PLCG1,PRKCQ,RAC2,RRAS2,SH2D1A,SYK,TYROBP,ZAP70
Interleukin-3, Interleukin-5 and GM-CSF signaling	4.08	0.109	-0.816	FYN,HCK,INPP5D,INPP5K,LYN,SYK
Opioid Signaling Pathway	4.03	0.0464	0.832	ADCY6,Calm1 (includes others),FYN,HCK,KCNJ6,LCK,LYN,PRKAG1,PRKCQ,RAC2,RGS1,RGS14,RRAS2
Ephrin A Signaling	4.02	0.0647	-0.333	ARAF,CYBB,FYN,HCK,LCK,LYN,MYL11,NCK2,PRKAG1
FLT3 Signaling	3.99	0.139	-0.447	FYN,HCK,LCK,PTPRJ,SYK
Cell surface interactions at the vascular wall	3.93	0.0521	-0.302	DOK2,FCER1G,FYN,IGKC,INPP5D,ITGAV,LCK,LYN,PICK1,PLCG1,SDC4
Myelination Signaling Pathway	3.92	0.0428	1.069	ARAF,ARHGAP9,Calm1 (includes others),CHD7,FYN,HCK,ID2,LCK,LYN,PLCG1,PRKAG1,RAPGEF3,RRAS2,SMO
Nuclear Cytoskeleton Signaling Pathway	3.77	0.05	1.508	CSNK2A1,DCTN3,FYN,HCK,ITGAE,ITGAV,KLC2,LCK,LYN,PPARG,XRCC6
CTLA4 Signaling in Cytotoxic T Lymphocytes	3.75	0.0329	-1.147	CD3D,CD3E,CD3G,CD86,CD8A,CD8B,FCER1G,FYN,HCK,HLA-DQB1,ITK,LCK,LYN,PLCG1,PRKCQ,RAC2,RRAS2,Trac,Trbc2,ZAP70
Apelin Adipocyte Signaling Pathway	3.7	0.0769	0.816	ADCY6,CYBB,GPX1,MGST2,PRDX6,PRKAG1,RAC2
Mitochondrial Dysfunction	3.69	0.0407	-2.673	BAX,Calm1 (includes others),GPX1,MGST2,NDUFA10,NDUFB11,NDUFV3,PPARG,PRDX6,PRKAG1,RAPGEF3,SURF1,TOMM20,UQCRC2
T Cell Receptor Signaling	3.68	0.0325	2.982	Calm1 (includes others),CD3D,CD3E,CD3G,CD86,CD8A,CD8B,FCER1G,FYN,HLA-DQB1,ITK,LCK,PLCG1,PRKCQ,RRAS2,SKAP1,Tcf7,Trac,Trbc2,ZAP70
Macrophage Classical Activation Signaling Pathway	3.67	0.0529	-1.667	CD86,CYBB,GBP2,HLA-DQB1,IRF5,IRF8,JARID2,PPARG,SOCS1,UQCRC2
Th1 Pathway	3.67	0.0656	0.378	CD3D,CD3E,CD3G,CD86,CD8A,HLA-DQB1,PRKCQ,SOCS1
Macrophage Alternative Activation Signaling Pathway	3.66	0.0526	-1.897	ABCA1,DUSP1,FCER1G,FCGR2B,HLA-DQB1,IGKC,IRF5,PPARG,SOCS1,SYK
TEC Kinase Signaling	3.59	0.0329	0.905	BTK,CD3D,CD3E,CD3G,FCER1G,FYN,HCK,ITGAE,ITGAV,ITK,LCK,LYN,PLCG1,PRKCQ,RAC2,RHOH,Trac,Trbc2,TXK
14-3-3-mediated Signaling	3.55	0.063	#NUM!	BAX,EDC3,PLCG1,PRKCQ,RRAS2,SRPK2,TUBB,TUBG1
Pulmonary Healing Signaling Pathway	3.49	0.0503	1.265	ARAF,FYN,HCK,LCK,LYN,PRKAG1,PRKCQ,RRAS2,SMO,Tcf7
Chronic Myeloid Leukemia Signaling	3.47	0.0432	1.732	Calm1 (includes others),CEBPA,HCK,IRF8,PCBP2,PLCG1,PRKAG1,RAC2,RRAS2,SMO,Tcf7,TFDP1
Fc epsilon receptor (FCERI) signaling	3.38	0.0485	0	BTK,FCER1G,FYN,IGKC,ITK,LYN,PLCG1,PRKCQ,SYK,TXK
Phospholipase C Signaling	3.38	0.0259	0.728	ADCY6,BTK,Calm1 (includes others),CD3D,CD3E,CD3G,FCER1G,FCGR2B,FYN,IGKC,Iglc2,ITGAE,ITGAV,ITK,LCK,LYN,MYL11,PLCG1,PRKCQ,RAC2,RALGDS,RAPGEF3,RHOH,RRAS2,SYK,TGM2,Trac,Trbc2,ZAP70
Sirtuin Signaling Pathway	3.29	0.0412	-1.134	ABCA1,BAX,LDHB,NDUFA10,NDUFB11,NDUFV3,PPARG,SLC25A4,TOMM20,UQCRC2,XPC,XRCC6
Signaling by CSF3 (G-CSF)	3.21	0.133	-1	HCK,LYN,SOCS1,SYK
Signaling by CSF1 (M-CSF) in myeloid cells	3.16	0.129	-1	FYN,HCK,INPP5D,LYN
WNT/SHH Axonal Guidance Signaling Pathway	3.09	0.0537	-0.707	ADCY6,FYN,HCK,LCK,LYN,PRKAG1,SMO,Tcf7
HER-2 Signaling in Breast Cancer	3.05	0.0441	0.632	ARAF,FCER1G,FYN,HCK,LCK,LYN,PLCG1,PRKCQ,RRAS2,SURF1
PTEN Signaling	3.05	0.053	-1.633	CSNK2A1,INPP5D,INPP5K,ITGAE,ITGAV,NTRK3,RAC2,RRAS2
Circadian Rhythm Signaling	3.05	0.041	#NUM!	ADCY6,ARAF,CSNK2A1,FYN,HCK,LCK,LYN,PLCG1,PRKAG1,PRKCQ,RRAS2
Platelet Adhesion to exposed collagen	3.04	0.2	#NUM!	FCER1G,FYN,LYN
Production of Nitric Oxide and Reactive Oxygen Species in Macrophages	3	0.0471	-0.707	APOE,CYBA,CYBB,IRF8,LYZ,PLCG1,PRKCQ,RAC2,RHOH
IL-10 Signaling	2.99	0.0519	0	CD86,CDKN2D,DUSP1,FCGR2B,HLA-DQB1,INPP5D,PRDM1,PRKAG1
Fcgamma receptor (FCGR) dependent phagocytosis	2.94	0.051	-0.707	BTK,CD3G,FYN,HCK,IGKC,LYN,PLCG1,SYK
Axonal Guidance Signaling	2.9	0.0314	#NUM!	ABLIM1,FYN,ITGAE,ITGAV,MYL11,NCK2,NTRK3,PLCG1,PRKAG1,PRKCQ,RAC2,ROBO2,RRAS2,SMO,TUBB,TUBG1
Eicosanoid Signaling	2.89	0.0393	2.714	ADCY6,ARAF,PLCG1,PRDX6,PRKAG1,PRKCQ,RAPGEF3,RAPGEF4,RRAS2,TBXA2R,Tcf7
IL-2 Signaling	2.88	0.0806	0	CSNK2A1,LCK,RRAS2,SOCS1,SYK
Signaling by NTRK3 (TRKC)	2.87	0.176	#NUM!	BAX,NTRK3,PLCG1
Detoxification of Reactive Oxygen Species	2.86	0.108	-1	CYBA,CYBB,GPX1,PRDX6
ID1 Signaling Pathway	2.85	0.0448	1	ARAF,ATF3,BAX,FYN,HCK,LCK,LYN,RRAS2,TGM2
Actin Nucleation by ARP-WASP Complex	2.84	0.0645	#NUM!	ITGAE,ITGAV,NCK2,RAC2,RHOH,RRAS2
S100 Family Signaling Pathway	2.84	0.0272	0.655	ADGRE5,ADGRG5,ARAF,Calm1 (includes others),CCR7,CCR9,CYBB,FCGR2B,IGKC,IRAK3,NAPSA,PLCG1,PRKAG1,PRKCQ,RAC2,S100A4,S100A6,SMO,TBXA2R,Tcf7,TRAF3
CD28 Signaling in T Helper Cells	2.84	0.0309	1	Calm1 (includes others),CD3D,CD3E,CD3G,CD86,FCER1G,FYN,HLA-DQB1,ITK,LCK,PLCG1,PRKCQ,SYK,Trac,Trbc2,ZAP70
ROBO SLIT Signaling Pathway	2.83	0.0551	0.378	FYN,HCK,LCK,LYN,NCK2,PRKAG1,ROBO2
Phagosome Maturation	2.82	0.0488	#NUM!	CTSC,CTSW,CTSZ,CYBB,PRDX6,RAC2,TUBB,TUBG1
Interferon gamma signaling	2.82	0.0638	-0.816	GBP2,HLA-DQB1,IFI30,IRF5,IRF8,SOCS1
Systemic Lupus Erythematosus in B Cell Signaling Pathway	2.82	0.0277	0.943	BTK,Calm1 (includes others),CD5,FCGR2B,FYN,HCK,IGKC,Iglc2,INPP5D,INPP5K,IRF5,LCK,LILRB4,LYN,PRKCQ,RAC2,RRAS2,SYK,TRAF3,TRAF4
Electron transport, ATP synthesis, and heat production by uncoupling proteins	2.81	0.0547	2.646	COX20,NDUFA10,NDUFAF7,NDUFB11,NDUFV3,SURF1,UQCRC2
Cilium Assembly	2.8	0.0441	1.667	ARL3,CCT8,CLASP1,DCTN3,DYNLT2B,SMO,TCP1,TUBB,TUBG1
Role of Macrophages, Fibroblasts and Endothelial Cells in Rheumatoid Arthritis	2.79	0.036	-0.577	Calm1 (includes others),CEBPA,IGKC,IRAK3,PLCG1,PRKCQ,RRAS2,SMO,SOCS1,Tcf7,TRAF3,TRAF4
IL-8 Signaling	2.72	0.0429	1	ARAF,BAX,CYBB,IRAK3,ITGAV,PRKCQ,RAC2,RHOH,RRAS2
Th1 and Th2 Activation Pathway	2.69	0.0465	#NUM!	CD3D,CD3E,CD3G,CD86,CD8A,HLA-DQB1,PRKCQ,SOCS1
Integrin Signaling	2.69	0.0425	1.667	FYN,ILKAP,ITGAE,ITGAV,NCK2,PLCG1,RAC2,RHOH,RRAS2
GM-CSF Signaling	2.64	0.0714	-1	BCL2A1,HCK,LYN,PIM1,RRAS2
Signaling by SCF-KIT	2.62	0.093	1	FYN,LCK,LYN,SOCS1
Protein Sorting Signaling Pathway	2.6	0.0449	0.707	ADCY6,FYN,HCK,LCK,LYN,PRKAG1,SNX4,SNX8
Melatonin Signaling	2.59	0.0694	1	ARAF,Calm1 (includes others),PLCG1,PRKAG1,PRKCQ
RHO GTPases Activate NADPH Oxidases	2.54	0.136	#NUM!	CYBA,CYBB,RAC2
PD-1, PD-L1 cancer immunotherapy pathway	2.53	0.0561	-1.633	CSNK2A1,HLA-DQB1,LCK,PLCG1,PRKCQ,ZAP70
Signaling by VEGF	2.51	0.0556	0	CYBA,CYBB,FYN,ITGAV,NCK2,PLCG1
Interleukin-2 family signaling	2.51	0.087	0	INPP5D,INPP5K,LCK,SYK
ICOS-ICOSL Signaling in T Helper Cells	2.51	0.0296	1.414	Calm1 (includes others),CD3D,CD3E,CD3G,CD86,FCER1G,HLA-DQB1,INPP5D,ITK,LCK,PLCG1,PRKCQ,Trac,Trbc2,ZAP70
α-Adrenergic Signaling	2.49	0.055	1	ADCY6,Calm1 (includes others),PLCG1,PRKAG1,PRKCQ,RRAS2
TREM1 Signaling	2.46	0.0649	-1.342	CD83,CD86,FCGR2B,PLCG1,TYROBP
Mitochondrial Fatty Acid Beta-Oxidation	2.43	0.125	#NUM!	ACBD6,HADHA,HADHB
Netrin-1 signaling	2.38	0.08	2	ABLIM1,FYN,PLCG1,PRKCQ
3-phosphoinositide Degradation	2.37	0.0412	0	DUSP1,DUSP10,ILKAP,INPP5D,INPP5K,PPTC7,PTPRF,PTPRJ
Superpathway of Inositol Phosphate Compounds	2.37	0.038	0.333	DUSP1,DUSP10,ILKAP,INPP5D,INPP5K,PLCG1,PPTC7,PTPRF,PTPRJ
IL-13 Signaling Pathway	2.36	0.0517	-0.816	DUSP1,FYN,HCK,LCK,LYN,SOCS1
Neuregulin Signaling	2.34	0.0513	#NUM!	ITGAE,ITGAV,PICK1,PLCG1,PRKCQ,RRAS2
Molecular Mechanisms of Cancer	2.32	0.0245	2.4	ADCY6,ADGRE5,ADGRG5,BAX,CCR7,CCR9,CDKN2D,FYN,ITGAE,ITGAV,PRKAG1,PRKCQ,RAC2,RALGDS,RAPGEF3,RHOH,RRAS2,SMO,TBXA2R,Tcf7,TFDP1
D-myo-inositol-5-phosphate Metabolism	2.3	0.0402	0.378	DUSP1,DUSP10,ILKAP,INPP5D,PLCG1,PPTC7,PTPRF,PTPRJ
Adrenomedullin signaling pathway	2.3	0.0402	0.707	ADCY6,ARAF,BAX,Calm1 (includes others),PLCG1,PPARG,PRKAG1,RRAS2
Integrin signaling	2.28	0.111	#NUM!	RAPGEF3,RAPGEF4,SYK
G-Protein Coupled Receptor Signaling	2.24	0.0256	2.357	ADCY6,ADGRE5,ADGRG5,Calm1 (includes others),CCR7,CCR9,DUSP1,FYN,MYL11,PLCG1,PRKAG1,RAC2,RAPGEF3,RAPGEF4,RGS14,RRAS2,SMO,TBXA2R
Glutathione Redox Reactions I	2.24	0.107	#NUM!	GPX1,MGST2,PRDX6
PDGF Signaling	2.23	0.0575	1.342	CSNK2A1,INPP5D,INPP5K,PLCG1,RRAS2
Glioma Signaling	2.2	0.048	1	Calm1 (includes others),CDKN2D,PLCG1,PRKCQ,RRAS2,TFDP1
HIF1α Signaling	2.18	0.0383	1.89	ARAF,CYBB,LDHB,NAA10,PLCG1,PRKCQ,RAC2,RRAS2
CXCR4 Signaling	2.16	0.0417	0.816	ADCY6,LYN,MYL11,PRKCQ,RAC2,RHOH,RRAS2
Acute Myeloid Leukemia Signaling	2.15	0.0549	2	ARAF,CEBPA,PIM1,RRAS2,Tcf7
Ketolysis	2.14	0.2	#NUM!	HADHA,HADHB
G Beta Gamma Signaling	2.14	0.0465	1.633	BTK,KCNJ6,PLCG1,PRKAG1,PRKCQ,RRAS2
Hematoma Resolution Signaling Pathway	2.13	0.0349	1	CYBB,DUSP1,FTH1,NDUFA10,NDUFB11,NDUFV3,PPARG,PRKAG1,SOCS1
PKCθ Signaling in T Lymphocytes	2.13	0.0269	1.941	CD3D,CD3E,CD3G,CD86,FCER1G,FYN,HLA-DQB1,LCK,PLCG1,PRKCQ,RAC2,RRAS2,Trac,Trbc2,ZAP70
Ferroptosis Signaling Pathway	2.11	0.0458	0	ABCA1,ARAF,CYBB,FTH1,PRKAG1,RRAS2
Role of Osteoclasts in Rheumatoid Arthritis Signaling Pathway	2.1	0.0325	0	ARAF,BTK,Calm1 (includes others),FCGR2B,PLCG1,RAC2,RHOH,RRAS2,SYK,TYROBP
Synaptic Long Term Potentiation	2.09	0.0455	0.816	Calm1 (includes others),PLCG1,PRKAG1,PRKCQ,RAPGEF3,RRAS2
Netrin Signaling	2.09	0.0405	2.646	ABLIM1,FYN,NCK2,PLCG1,PRKAG1,PRKCQ,RAC2
Prolactin Signaling	2.08	0.0526	1.342	FYN,PLCG1,PRKCQ,RRAS2,SOCS1
Regulation of IL-2 Expression in Activated and Anergic T Lymphocytes	2.07	0.0281	2.309	Calm1 (includes others),CD3D,CD3E,CD3G,FCER1G,FYN,LCK,PLCG1,PRKCQ,RRAS2,Trac,Trbc2,ZAP70
Protein Kinase A Signaling	2.07	0.0292	0	ADCY6,Calm1 (includes others),DUSP1,DUSP10,MYL11,PLCG1,PRKAG1,PRKCQ,PTPRF,PTPRJ,SMO,Tcf7
Ketogenesis	2.06	0.182	#NUM!	HADHA,HADHB
NF-κB Signaling	2.05	0.0263	1.897	ARAF,CD3D,CD3E,CD3G,CSNK2A1,FCER1G,IRAK3,LCK,NTRK3,PRKCQ,RRAS2,Trac,TRAF3,Trbc2,ZAP70
Synaptogenesis Signaling Pathway	2.04	0.0317	0.632	ADCY6,APOE,Calm1 (includes others),FYN,HCK,LCK,LYN,PLCG1,PRKAG1,RRAS2
Neuroinflammation Signaling Pathway	2.02	0.0315	-1.414	CD86,CYBB,HLA-DQB1,IRAK3,KCNJ6,PLCG1,RAC2,SYK,TRAF3,TYROBP
Th2 Pathway	2.02	0.0438	0.816	CD3D,CD3E,CD3G,CD86,HLA-DQB1,PRKCQ
Colorectal Cancer Metastasis Signaling	2	0.0332	2.121	ADCY6,BAX,PRKAG1,RAC2,RALGDS,RHOH,RRAS2,SMO,Tcf7
Gαi Signaling	1.97	0.0429	-0.447	ADCY6,PRKAG1,RALGDS,RGS14,RRAS2,TBXA2R
Insulin Receptor Signaling	1.97	0.0429	0	FYN,INPP5D,INPP5K,PRKAG1,PTPRF,RRAS2
D-myo-inositol (1,4,5,6)-Tetrakisphosphate Biosynthesis	1.97	0.0383	0	DUSP1,DUSP10,ILKAP,INPP5D,PPTC7,PTPRF,PTPRJ
D-myo-inositol (3,4,5,6)-tetrakisphosphate Biosynthesis	1.97	0.0383	0	DUSP1,DUSP10,ILKAP,INPP5D,PPTC7,PTPRF,PTPRJ
Insulin Secretion Signaling Pathway	1.96	0.0327	1.667	ADCY6,FYN,HCK,LCK,LYN,PLCG1,PRKAG1,PRKCQ,RAPGEF4
Apoptosis Signaling	1.92	0.0481	-1.342	BAX,BCL2A1,PLCG1,PRKCQ,RRAS2
IGF-1 Signaling	1.9	0.0476	1	CSNK2A1,IGFBP4,PRKAG1,RRAS2,SOCS1
Dendritic Cell Maturation	1.89	0.0252	-0.707	CCR7,CD3D,CD3E,CD3G,CD83,CD86,FCER1G,FCGR2B,HLA-DQB1,IGKC,IRF8,PLCG1,Trac,Trbc2,TYROBP
Phosphatidylethanolamine Biosynthesis III	1.88	1	#NUM!	PTDSS2
Mevalonate Pathway I	1.85	0.143	#NUM!	HADHA,HADHB
Interferon alpha/beta signaling	1.85	0.0563	0	GBP2,IRF5,IRF8,SOCS1
Growth Hormone Signaling	1.85	0.0563	0	CEBPA,PLCG1,PRKCQ,SOCS1
Semaphorin Neuronal Repulsive Signaling Pathway	1.84	0.04	1.342	FYN,ITGAE,ITGAV,MYL11,PLCG1,PRKAG1
Corticotropin Releasing Hormone Signaling	1.81	0.0395	2.236	ADCY6,Calm1 (includes others),PLCG1,PRKAG1,PRKCQ,SMO
Glioma Invasiveness Signaling	1.8	0.0548	#NUM!	ITGAV,RAC2,RHOH,RRAS2
Oxidative Phosphorylation	1.79	0.0446	2.236	NDUFA10,NDUFB11,NDUFV3,SURF1,UQCRC2
Granzyme A Signaling	1.79	0.0541	-2	NDUFA10,NDUFB11,NDUFV3,XRCC6
RHO GTPase cycle	1.78	0.0267	2.309	ARHGAP9,CYBA,CYBB,DOCK9,LCK,NCK2,RAC2,RHOH,RRAS2,SCFD1,SHMT2,ZAP70
Human Embryonic Stem Cell Pluripotency	1.76	0.0348	1.134	ARAF,FUT4,ID2,NTRK3,PRKCQ,RRAS2,SMO
MyD88:MAL(TIRAP) cascade initiated on plasma membrane	1.75	0.0714	#NUM!	BTK,IRAK3,SOCS1
Docosahexaenoic Acid (DHA) Signaling	1.74	0.032	2.121	ADCY6,ARAF,BAX,BCL2A1,PLCG1,PRDX6,PRKAG1,PRKCQ
Regulation of Actin-based Motility by Rho	1.74	0.0435	#NUM!	ITGAE,ITGAV,MYL11,RAC2,RHOH
Mitotic Prometaphase	1.74	0.0345	1.89	CENPM,CLASP1,CSNK2A1,DCTN3,EML4,TUBB,TUBG1
Rap1 signalling	1.74	0.125	#NUM!	RAPGEF3,RAPGEF4
Glutaryl-CoA Degradation	1.74	0.125	#NUM!	HADHA,HADHB
D-myo-inositol (1,4,5)-trisphosphate Degradation	1.74	0.125	#NUM!	INPP5D,INPP5K
Role of NFAT in Regulation of the Immune Response	1.73	0.0213	0.471	BTK,Calm1 (includes others),CD3D,CD3E,CD3G,CD86,FCER1G,FCGR2B,FYN,HLA-DQB1,IGKC,Iglc2,ITK,LCK,LYN,PLCG1,PRKCQ,RRAS2,SYK,Trac,Trbc2,ZAP70
PAK Signaling	1.71	0.0427	#NUM!	ITGAE,ITGAV,MYL11,NCK2,RRAS2
Calcium-induced T Lymphocyte Apoptosis	1.71	0.0261	1.667	Calm1 (includes others),CD3D,CD3E,CD3G,FCER1G,HLA-DQB1,LCK,PLCG1,PRKCQ,Trac,Trbc2,ZAP70
NF-κB Activation by Viruses	1.71	0.0513	1	ITGAV,LCK,PRKCQ,RRAS2
IL-7 Signaling Pathway	1.71	0.0513	0	BAX,FYN,LYN,SOCS1
Virus Entry via Endocytic Pathways	1.7	0.0424	2.236	FYN,PLCG1,PRKCQ,RAC2,RRAS2
GPCR-Mediated Nutrient Sensing in Enteroendocrine Cells	1.7	0.0424	2.236	ADCY6,PLCG1,PRKAG1,PRKCQ,RAPGEF4
Role of Tissue Factor in Cancer	1.7	0.0338	0.378	ARAF,FYN,HCK,ITGAV,LCK,LYN,RRAS2
Estrogen Receptor Signaling	1.7	0.0269	2.828	ADCY6,MED30,MYL11,NDUFA10,NDUFB11,NDUFV3,PLCG1,PRKAG1,PRKCQ,RRAS2,UQCRC2
Isoleucine Degradation I	1.69	0.118	#NUM!	HADHA,HADHB
1D-myo-inositol Hexakisphosphate Biosynthesis II (Mammalian)	1.69	0.118	#NUM!	INPP5D,INPP5K
D-myo-inositol (1,3,4)-trisphosphate Biosynthesis	1.69	0.118	#NUM!	INPP5D,INPP5K
3-phosphoinositide Biosynthesis	1.68	0.0335	0	DUSP1,DUSP10,ILKAP,INPP5D,PPTC7,PTPRF,PTPRJ
Renin-Angiotensin Signaling	1.66	0.0413	2	ADCY6,PLCG1,PRKAG1,PRKCQ,RRAS2
Cardiac Hypertrophy Signaling	1.65	0.0307	1.89	ADCY6,Calm1 (includes others),MYL11,PLCG1,PRKAG1,RAC2,RHOH,RRAS2
Superpathway of Geranylgeranyldiphosphate Biosynthesis I (via Mevalonate)	1.64	0.111	#NUM!	HADHA,HADHB
Gαq Signaling	1.6	0.0353	0.447	BTK,Calm1 (includes others),PLCG1,PRKCQ,RAC2,RHOH
MHC class II antigen presentation	1.59	0.0397	-0.447	CTSC,DCTN3,HLA-DQB1,KLC2,LGMN
Gαs Signaling	1.59	0.0397	0.447	ADCY6,HCK,PRKAG1,RAPGEF3,RAPGEF4
Glycine Biosynthesis I	1.58	0.5	#NUM!	SHMT2
Endocannabinoid Developing Neuron Pathway	1.58	0.0394	1	ADCY6,ARAF,PRKAG1,RAC2,RRAS2
TP53 Regulates Transcription of Cell Cycle Genes	1.58	0.0612	#NUM!	BAX,RGCC,TFDP1
Receptor-type tyrosine-protein phosphatases	1.55	0.1	#NUM!	NTRK3,PTPRF
Class I peroxisomal membrane protein import	1.55	0.1	#NUM!	PEX16,PXMP4
Valine Degradation I	1.55	0.1	#NUM!	HADHA,HADHB
Gap Junction Signaling	1.54	0.0277	1	ADCY6,Calm1 (includes others),PLCG1,PRKAG1,PRKCQ,RRAS2,Tcf7,TUBB,TUBG1
Transcriptional regulation of granulopoiesis	1.53	0.0588	#NUM!	CEBPA,MYB,TFDP1
UVC-Induced MAPK Signaling	1.53	0.0588	#NUM!	ARAF,PRKCQ,RRAS2
Mitotic G1 phase and G1/S transition	1.53	0.0382	#NUM!	CDKN2D,CKS1B,LIN54,LYN,TFDP1
fMLP Signaling in Neutrophils	1.53	0.0382	0	Calm1 (includes others),CYBB,PRKCQ,RAC2,RRAS2
Thrombin Signaling	1.53	0.0311	1.342	ADCY6,MYL11,PLCG1,PRKCQ,RAC2,RHOH,RRAS2
RAB GEFs exchange GTP for GDP on RABs	1.52	0.0449	0	GDI1,RAB32,RIC1,RINL
HGF Signaling	1.52	0.0379	#NUM!	ITGAE,ITGAV,PLCG1,PRKCQ,RRAS2
P2Y Purinergic Receptor Signaling Pathway	1.5	0.0376	2.236	ADCY6,PLCG1,PRKAG1,PRKCQ,RRAS2
Crosstalk between Dendritic Cells and Natural Killer Cells	1.49	0.044	#NUM!	CCR7,CD83,CD86,TYROBP
FAK Signaling	1.48	0.0203	1.964	ADGRE5,ADGRG5,CCR7,CCR9,CD3D,CD3E,CD3G,FCER1G,FYN,ITGAE,ITGAV,LCK,NCK2,PLCG1,RRAS2,SMO,SOCS1,TBXA2R,Tcf7,Trac,Trbc2
Superpathway of D-myo-inositol (1,4,5)-trisphosphate Metabolism	1.48	0.0909	#NUM!	INPP5D,INPP5K
ERBB Signaling	1.46	0.043	2	NCK2,PLCG1,PRKCQ,RRAS2
RAC Signaling	1.46	0.0365	#NUM!	CYBB,ITGAE,ITGAV,RAC2,RRAS2
CLEAR Signaling Pathway	1.45	0.0281	0	IFI30,NTRK3,PLCG1,PRKAG1,PRKCQ,PSAP,RRAS2,WDR45
Pyroptosis Signaling Pathway	1.45	0.0426	-1	BAX,GBP2,PRKAG1,TRAF3
The citric acid (TCA) cycle and respiratory electron transport	1.45	0.0545	#NUM!	FH,LDHB,SUCLG1
Reelin Signaling in Neurons	1.45	0.0362	0	APOE,FYN,HCK,LCK,LYN
White Adipose Tissue Browning Pathway	1.45	0.0362	0.447	ADCY6,FCER1G,LDHB,PPARG,PRKAG1
RAF-independent MAPK1/3 activation	1.44	0.087	#NUM!	DUSP1,DUSP10
Nephrin family interactions	1.44	0.087	#NUM!	FYN,NCK2
TCA Cycle II (Eukaryotic)	1.44	0.087	#NUM!	FH,SUCLG1
Tryptophan Degradation III (Eukaryotic)	1.44	0.087	#NUM!	HADHA,HADHB
Dopamine-DARPP32 Feedback in cAMP Signaling	1.43	0.0323	1.342	ADCY6,Calm1 (includes others),KCNJ6,PLCG1,PRKAG1,PRKCQ
cAMP-mediated signaling	1.43	0.0297	0.378	ADCY6,Calm1 (includes others),DUSP1,RAPGEF3,RAPGEF4,RGS14,TBXA2R
Osteoarthritis Pathway	1.43	0.0297	-0.447	ITGAE,ITGAV,PPARG,PRKAG1,SDC4,SMO,Tcf7
CSDE1 Signaling Pathway	1.43	0.0536	#NUM!	EDC3,PABPN1,SDC4
Small Cell Lung Cancer Signaling	1.42	0.0417	#NUM!	CKS1B,TFDP1,TRAF3,TRAF4
T Cell Exhaustion Signaling Pathway	1.42	0.0229	-2.449	CD3D,CD3E,CD3G,CD86,FCER1G,HLA-DQB1,PLCG1,PRDM1,PRKCQ,RRAS2,Trac,Trbc2,ZAP70
Orexin Signaling Pathway	1.41	0.0294	0.378	ADCY6,Calm1 (includes others),KCNJ6,PLCG1,PPARG,PRKAG1,PRKCQ
Apelin Endothelial Signaling Pathway	1.41	0.0355	0.447	ADCY6,Calm1 (includes others),PRKAG1,PRKCQ,RRAS2
Uracil Degradation II (Reductive)	1.41	0.333	#NUM!	DPYD
Thymine Degradation	1.41	0.333	#NUM!	DPYD
Growth hormone receptor signaling	1.41	0.0833	#NUM!	LYN,SOCS1
Melanocyte Development and Pigmentation Signaling	1.39	0.0408	2	ADCY6,PLCG1,PRKAG1,RRAS2
Glycerophospholipid biosynthesis	1.38	0.0404	2	CSNK2A1,HADHA,HADHB,PTDSS2
B Cell Receptor Signaling	1.38	0.0221	-0.905	BCL2A1,BTK,Calm1 (includes others),FCGR2B,IGKC,Iglc2,INPP5D,INPP5K,LYN,POU2F2,PRKCQ,RAC2,RRAS2,SYK
Signaling by NTRK2 (TRKB)	1.37	0.08	#NUM!	FYN,PLCG1
Signaling by Erythropoietin	1.37	0.08	#NUM!	LYN,PLCG1
Polyamine Regulation in Colon Cancer	1.37	0.0508	#NUM!	ARAF,CSNK2A1,PPARG
Acetylcholine Receptor Signaling Pathway	1.36	0.0309	1.633	ADCY6,Calm1 (includes others),FYN,PLCG1,PRKAG1,PRKCQ
Endothelin-1 Signaling	1.36	0.0309	1.342	ADCY6,ARAF,PLCG1,PRDX6,PRKCQ,RRAS2
Glucocorticoid Receptor Signaling	1.35	0.0223	#NUM!	CD3D,CD3E,CD3G,CEBPA,DUSP1,HLA-DQB1,NDUFA10,NDUFB11,NDUFV3,PPARG,PRKAG1,RRAS2,UQCRC2
Semaphorin Signaling in Neurons	1.33	0.0492	#NUM!	FYN,RAC2,RHOH
Sumoylation Pathway	1.33	0.0388	#NUM!	CEBPA,MYB,RAC2,RHOH
Mouse Embryonic Stem Cell Pluripotency	1.31	0.0385	1	ID2,RRAS2,SMO,Tcf7
Effects of PIP2 hydrolysis	1.31	0.0741	#NUM!	DGKQ,PRKCQ
Syndecan interactions	1.31	0.0741	#NUM!	ITGAV,SDC4
Thrombopoietin Signaling	1.3	0.0476	#NUM!	PLCG1,PRKCQ,RRAS2
Parkinson's Signaling Pathway	1.29	0.0261	-2.828	Calm1 (includes others),FCGR2B,NDUFA10,NDUFB11,NDUFV3,TOMM20,TUBB,TUBG1
Ephrin Receptor Signaling	1.29	0.0297	2	FYN,ITGAE,ITGAV,NCK2,RAC2,RRAS2
Proline Biosynthesis I	1.29	0.25	#NUM!	PYCR2
Signaling by ALK	1.28	0.0714	#NUM!	PLCG1,PRDM1
Mitochondrial protein import	1.28	0.0469	#NUM!	BCS1L,SLC25A4,TOMM20
Paxillin Signaling	1.28	0.0374	#NUM!	ITGAE,ITGAV,NCK2,RRAS2
Pyridoxal 5'-phosphate Salvage Pathway	1.27	0.0462	#NUM!	ARAF,PIM1,PRKCQ
TNFs bind their physiological receptors	1.26	0.069	#NUM!	CD27,TNFRSF18
Superpathway of Cholesterol Biosynthesis	1.26	0.069	#NUM!	HADHA,HADHB
eNOS Signaling	1.26	0.0321	1.342	ADCY6,Calm1 (includes others),PLCG1,PRKAG1,PRKCQ
Ovarian Cancer Signaling	1.24	0.0316	#NUM!	PRKAG1,RRAS2,SMO,Tcf7,TFDP1
Mitophagy	1.23	0.0667	#NUM!	CSNK2A1,TOMM20
CREB Signaling in Neurons	1.23	0.0214	2.496	ADCY6,ADGRE5,ADGRG5,Calm1 (includes others),CCR7,CCR9,NTRK3,PLCG1,PRKAG1,PRKCQ,RRAS2,SMO,TBXA2R
ERBB4 Signaling	1.22	0.0441	#NUM!	PLCG1,PRKCQ,RRAS2
Class I MHC mediated antigen processing and presentation	1.22	0.024	1	BTK,CYBA,CYBB,FBXL12,FBXO31,RNF19A,SOCS1,UBA1,ZNRF1
Sonic Hedgehog Signaling	1.2	0.0645	#NUM!	PRKAG1,SMO
Role of JAK1 and JAK3 in γc Cytokine Signaling	1.2	0.0435	#NUM!	RRAS2,SOCS1,SYK
Role of MAPK Signaling in Promoting the Pathogenesis of Influenza	1.2	0.0351	#NUM!	ARAF,BAX,PRDX6,RRAS2
Signaling by MST1	1.19	0.2	#NUM!	SPINT2
Reelin signalling pathway	1.19	0.2	#NUM!	FYN
Proline Biosynthesis II (from Arginine)	1.19	0.2	#NUM!	PYCR2
Superpathway of Serine and Glycine Biosynthesis I	1.19	0.2	#NUM!	SHMT2
dTMP De Novo Biosynthesis	1.19	0.2	#NUM!	SHMT2
Tyrosine Degradation I	1.19	0.2	#NUM!	FAH
Folate Polyglutamylation	1.19	0.2	#NUM!	SHMT2
Sleep NREM Signaling Pathway	1.18	0.0348	-2	ADCY6,ARAF,PRKAG1,RRAS2
COPII-mediated vesicle transport	1.16	0.0417	#NUM!	CTSC,CTSZ,SCFD1
Activation of the pre-replicative complex	1.16	0.0606	#NUM!	MCM2,RPA3
RHOGDI Signaling	1.15	0.0273	#NUM!	ARHGAP9,ITGAE,ITGAV,MYL11,RAC2,RHOH
Cholecystokinin/Gastrin-mediated Signaling	1.14	0.0336	#NUM!	PRKCQ,RAC2,RHOH,RRAS2
Oncogene Induced Senescence	1.13	0.0588	#NUM!	CDKN2D,TFDP1
Cargo concentration in the ER	1.13	0.0588	#NUM!	CTSC,CTSZ
Fatty Acid β-oxidation I	1.13	0.0588	#NUM!	HADHA,HADHB
Multiple Sclerosis Signaling Pathway	1.13	0.027	-0.816	BAX,C1QB,DUSP1,HLA-DQB1,JARID2,PPARG
Sphingosine-1-phosphate Signaling	1.13	0.0333	#NUM!	ADCY6,PLCG1,RAC2,RHOH
NGF Signaling	1.13	0.0333	#NUM!	BAX,PLCG1,RRAS2,TRAF4
p38 MAPK Signaling	1.13	0.0333	0	DUSP1,DUSP10,HMGN1,IRAK3
Signaling by the B Cell Receptor (BCR)	1.13	0.0294	-1.342	BTK,FYN,IGKC,LYN,SYK
Germ Cell-Sertoli Cell Junction Signaling	1.13	0.0294	#NUM!	RAC2,RHOH,RRAS2,TUBB,TUBG1
Glioblastoma Multiforme Signaling	1.12	0.0292	2	PLCG1,RAC2,RHOH,RRAS2,SMO
Role of NFAT in Cardiac Hypertrophy	1.12	0.0268	1.633	ADCY6,Calm1 (includes others),PLCG1,PRKAG1,PRKCQ,RRAS2
Caveolar-mediated Endocytosis Signaling	1.12	0.04	#NUM!	FYN,ITGAE,ITGAV
GPCR-Mediated Integration of Enteroendocrine Signaling Exemplified by an L Cell	1.12	0.04	#NUM!	ADCY6,PLCG1,PRKAG1
Pyruvate Fermentation to Lactate	1.12	0.167	#NUM!	LDHB
Nucleotide Excision Repair Pathway	1.11	0.0571	#NUM!	RPA3,XPC
Leptin Signaling in Obesity	1.1	0.0395	#NUM!	ADCY6,PLCG1,PRKAG1
GDNF Family Ligand-Receptor Interactions	1.1	0.0395	#NUM!	DOK2,PLCG1,RRAS2
Macropinocytosis Signaling	1.1	0.0395	#NUM!	PLCG1,PRKCQ,RRAS2
Interferon Signaling	1.09	0.0556	#NUM!	BAX,SOCS1
VDR/RXR Activation	1.08	0.0385	#NUM!	CEBPA,CSNK2A1,PRKCQ
Neurotrophin/TRK Signaling	1.08	0.0385	#NUM!	NTRK3,PLCG1,RRAS2
Systemic Lupus Erythematosus in T Cell Signaling Pathway	1.08	0.0202	-0.707	CD3D,CD3E,CD3G,CD86,FCER1G,HLA-DQB1,PLCG1,RAC2,RHOH,RRAS2,SYK,Trac,Trbc2
Gene and protein expression by JAK-STAT signaling after IL-12 stimulation	1.07	0.0541	#NUM!	HNRNPDL,TCP1
IL-3 Signaling	1.07	0.038	#NUM!	INPP5D,PRKCQ,RRAS2
Thyroid Cancer Signaling	1.07	0.038	#NUM!	NTRK3,RRAS2,Tcf7
Role of MAPK Signaling in Inhibiting the Pathogenesis of Influenza	1.07	0.038	#NUM!	ARAF,BAX,PRDX6
Arginine Degradation VI (Arginase 2 Pathway)	1.05	0.143	#NUM!	PYCR2
Adenine and Adenosine Salvage III	1.05	0.143	#NUM!	ADA
Glycoaminoglycan-protein Linkage Region Biosynthesis	1.05	0.143	#NUM!	B4GALT7
Fanconi Anemia Pathway	1.05	0.0526	#NUM!	FAAP24,RPA3
Resolution of Abasic Sites (AP sites)	1.05	0.0526	#NUM!	MBD4,RPA3
PI3K Signaling in B Lymphocytes	1.05	0.0204	0	ATF3,BTK,Calm1 (includes others),FCGR2B,FYN,IGKC,Iglc2,INPP5D,LYN,PLCG1,RRAS2,SYK
Signaling by NTRK1 (TRKA)	1.04	0.037	#NUM!	DNAL4,PLCG1,RALGDS
Chemokine Signaling	1.04	0.037	#NUM!	Calm1 (includes others),PLCG1,RRAS2
Clathrin-mediated endocytosis	1.03	0.0308	1	CD3D,CD3G,PACSIN1,REPS1
Regulation of TP53 Expression and Degradation	1.03	0.0513	#NUM!	PRDM1,RFFL
NGF-stimulated transcription	1.03	0.0513	#NUM!	ID2,JUNB
NRF2-mediated Oxidative Stress Response	1.03	0.0253	0.447	FTH1,HACD3,JUNB,MGST2,PRKCQ,RRAS2
Breast Cancer Regulation by Stathmin1	1.02	0.0202	0.577	ADGRE5,ADGRG5,CCR7,CCR9,PRKAG1,PRKCQ,RAC2,RRAS2,SMO,TBXA2R,TUBB,TUBG1
Gα12/13 Signaling	1.01	0.0301	1	BTK,MYL11,RRAS2,TBXA2R
Transcriptional regulation of white adipocyte differentiation	1	0.0357	#NUM!	CEBPA,MED30,PPARG
Role of MAPK Signaling in the Pathogenesis of Influenza	1	0.0357	#NUM!	BAX,PRDX6,RRAS2
VEGF Family Ligand-Receptor Interactions	1	0.0357	#NUM!	PLCG1,PRKCQ,RRAS2
Purine Ribonucleosides Degradation to Ribose-1-phosphate	0.998	0.125	#NUM!	ADA
DAG and IP3 signaling	0.995	0.0488	#NUM!	ADCY6,PLCG1
RET signaling	0.995	0.0488	#NUM!	DOK2,PLCG1
STAT3 Pathway	0.988	0.0296	#NUM!	NTRK3,PIM1,RRAS2,SOCS1
Neddylation	0.971	0.0244	2.449	COMMD10,COMMD3,COMMD5,FBXL12,FBXO31,UFD1
Sphingolipid metabolism	0.971	0.0345	#NUM!	GM2A,PRKD2,PSAP
Regulation of the Epithelial Mesenchymal Transition in Development Pathway	0.971	0.0345	#NUM!	S100A4,SMO,Tcf7
GNRH Signaling	0.966	0.0262	2	ADCY6,Calm1 (includes others),PRKAG1,PRKCQ,RRAS2
Hereditary Breast Cancer Signaling	0.962	0.029	0	FAAP24,RRAS2,TUBG1,XPC
Smooth Muscle Contraction	0.961	0.0465	#NUM!	ANXA6,MYL11
TP53 Regulates Metabolic Genes	0.96	0.0341	#NUM!	COX20,PRKAG1,SURF1
Pancreatic Secretion Signaling Pathway	0.959	0.0242	0.816	ADCY6,ATP2B1,PLCG1,PRKAG1,PRKCQ,RAPGEF3
Lipophagy	0.95	0.111	#NUM!	PRKAG1
Folate Transformations I	0.95	0.111	#NUM!	SHMT2
BBSome Signaling Pathway	0.948	0.0204	2.53	ADGRE5,ADGRG5,CCR7,CCR9,CCT8,MYL11,PRKAG1,SMO,TBXA2R,TCP1
PIP3 activates AKT signaling	0.945	0.0286	1	CD86,FYN,LCK,RAC2
PPARα/RXRα Activation	0.945	0.0258	0	ABCA1,ADCY6,PLCG1,PRKAG1,RRAS2
Retinoid metabolism and transport	0.944	0.0455	#NUM!	APOE,SDC4
Regulation of the Epithelial-Mesenchymal Transition Pathway	0.938	0.0256	#NUM!	ARAF,ID2,RRAS2,SMO,Tcf7
Regulation of Cellular Mechanics by Calpain Protease	0.938	0.0333	#NUM!	ITGAE,ITGAV,RRAS2
Factors involved in megakaryocyte development and platelet production	0.928	0.033	#NUM!	DOCK9,EHD3,MYB
NER (Nucleotide Excision Repair, Enhanced Pathway)	0.928	0.033	#NUM!	HMGN1,RPA3,XPC
Synaptic Long Term Depression	0.918	0.0253	1	LYN,PLCG1,PRDX6,PRKCQ,RRAS2
Mitotic G2-G2/M phases	0.911	0.0251	0.447	CLASP1,DCTN3,LIN54,TUBB,TUBG1
Regulation of TP53 Activity through Phosphorylation	0.907	0.0323	#NUM!	CSNK2A1,PRKAG1,RPA3
RUNX1 and FOXP3 control the development of regulatory T lymphocytes (Tregs)	0.907	0.1	#NUM!	TNFRSF18
Calcium Transport I	0.907	0.1	#NUM!	ATP2B1
C-type lectin receptors (CLRs)	0.905	0.0276	#NUM!	FCER1G,FYN,LYN,SYK
PI3K/AKT Signaling	0.905	0.025	#NUM!	INPP5D,INPP5K,ITGAE,ITGAV,RRAS2
G alpha (i) signalling events	0.9	0.0233	0.816	ADCY6,CCR7,CCR9,PSAP,RGS1,RGS14
iNOS Signaling	0.897	0.0426	#NUM!	Calm1 (includes others),IRAK3
nNOS Signaling in Neurons	0.897	0.0426	#NUM!	Calm1 (includes others),PRKCQ
EPH-Ephrin signaling	0.897	0.0319	#NUM!	FYN,LYN,NCK2
Non-Small Cell Lung Cancer Signaling	0.897	0.0319	#NUM!	PLCG1,RRAS2,TFDP1
SAPK/JNK Signaling	0.895	0.0199	0.447	CD3D,CD3E,CD3G,DUSP10,FCER1G,LCK,RAC2,RRAS2,Trac,Trbc2
Endocannabinoid Cancer Inhibition Pathway	0.889	0.0272	-1	ADCY6,ATF3,PRKAG1,Tcf7
G alpha (z) signalling events	0.882	0.0417	#NUM!	ADCY6,PRKCQ
DNA Damage Bypass	0.882	0.0417	#NUM!	RPA3,UFD1
RAF/MAP kinase cascade	0.878	0.0229	0	ARAF,DUSP1,DUSP10,FYN,RALGDS,RASA4
Class B/2 (Secretin family receptors)	0.877	0.0312	#NUM!	ADGRE5,RAMP1,SMO
IL-1 Signaling	0.877	0.0312	#NUM!	ADCY6,IRAK3,PRKAG1
Endocannabinoid Neuronal Synapse Pathway	0.874	0.0268	0	ADCY6,KCNJ6,PLCG1,PRKAG1
RHO GTPases activate KTN1	0.868	0.0909	#NUM!	KLC2
Phenylalanine and tyrosine metabolism	0.868	0.0909	#NUM!	FAH
Glycine Betaine Degradation	0.868	0.0909	#NUM!	SHMT2
Transcriptional activity of SMAD2/SMAD3:SMAD4 heterotrimer	0.868	0.0408	#NUM!	JUNB,TFDP1
Nucleotide Excision Repair	0.867	0.0309	#NUM!	HMGN1,RPA3,XPC
Salvage Pathways of Pyrimidine Ribonucleotides	0.867	0.0309	#NUM!	ARAF,PIM1,PRKCQ
Hematopoiesis from Pluripotent Stem Cells	0.864	0.0201	#NUM!	CD3D,CD3E,CD3G,CD8A,CD8B,FCER1G,IGKC,Trac,Trbc2
Glutaminergic Receptor Signaling Pathway (Enhanced)	0.86	0.0215	1.134	ADCY6,Calm1 (includes others),DGKQ,PLCG1,PRDX6,PRKAG1,PRKCQ
Protein folding	0.858	0.0306	#NUM!	CCT8,CSNK2A1,TCP1
Pulmonary Fibrosis Idiopathic Signaling Pathway	0.855	0.0215	0.378	ARAF,BAX,ITGAV,JARID2,RRAS2,SMO,Tcf7
CDC42 Signaling	0.854	0.0191	1.633	CD3D,CD3E,CD3G,FCER1G,HLA-DQB1,ITGAE,ITGAV,ITK,MYL11,Trac,Trbc2
Signaling by ERBB2	0.853	0.04	#NUM!	FYN,PLCG1
NR1H2 and NR1H3-mediated signaling	0.853	0.04	#NUM!	ABCA1,APOE
MYC Mediated Apoptosis Signaling	0.853	0.04	#NUM!	BAX,PRKAG1
NUR77 Signaling in T Lymphocytes	0.852	0.0195	0.378	Calm1 (includes others),CD3D,CD3E,CD3G,CD86,FCER1G,HLA-DQB1,PRKCQ,Trac,Trbc2
Signaling by Rho Family GTPases	0.85	0.0225	#NUM!	CYBB,ITGAE,ITGAV,MYL11,RAC2,RHOH
Apelin Cardiomyocyte Signaling Pathway	0.849	0.0303	#NUM!	MYL11,PLCG1,PRKCQ
Factors Promoting Cardiogenesis in Vertebrates	0.844	0.0261	2	PLCG1,PRKCQ,SMO,Tcf7
Type II Diabetes Mellitus Signaling	0.844	0.0261	#NUM!	PPARG,PRKAG1,PRKCQ,SOCS1
Transcriptional regulation by RUNX2	0.84	0.0392	#NUM!	BAX,LGALS3
Amyloid Processing	0.84	0.0392	#NUM!	CSNK2A1,PRKAG1
S Phase	0.839	0.03	#NUM!	CKS1B,LIN54,TFDP1
Vitamin D (calciferol) metabolism	0.833	0.0833	#NUM!	LGMN
Neuropathic Pain Signaling in Dorsal Horn Neurons	0.83	0.0297	#NUM!	PLCG1,PRKAG1,PRKCQ
Apoptotic execution phase	0.826	0.0385	#NUM!	PRKCQ,SATB1
mTOR Signaling	0.818	0.0234	1	PRKAG1,PRKCQ,RAC2,RHOH,RRAS2
Autoimmune Thyroid Disease Signaling	0.816	0.0196	#NUM!	CD3D,CD3E,CD3G,CD86,FCER1G,HLA-DQB1,IGKC,Trac,Trbc2
Integration of energy metabolism	0.812	0.0291	#NUM!	ADCY6,RAPGEF3,RAPGEF4
Epithelial Adherens Junction Signaling	0.809	0.0253	-1	FYN,PRKAG1,RRAS2,Tcf7
Aryl Hydrocarbon Receptor Signaling	0.802	0.0252	#NUM!	BAX,MGST2,TFDP1,TGM2
Trafficking and processing of endosomal TLR	0.801	0.0769	#NUM!	LGMN
Metabolism of folate and pterines	0.801	0.0769	#NUM!	SHMT2
Cytosolic iron-sulfur cluster assembly	0.801	0.0769	#NUM!	NUBP2
Advanced glycosylation endproduct receptor signaling	0.801	0.0769	#NUM!	LGALS3
Cleavage and Polyadenylation of Pre-mRNA	0.801	0.0769	#NUM!	PABPN1
Intrinsic Pathway for Apoptosis	0.788	0.0364	#NUM!	BAX,TFDP1
Deadenylation-dependent mRNA decay	0.788	0.0364	#NUM!	EDC3,LSM6
Lymphotoxin β Receptor Signaling	0.788	0.0364	#NUM!	TRAF3,TRAF4
G Protein Signaling Mediated by Tubby	0.781	0.0192	2.121	CD3D,CD3E,CD3G,FCER1G,ITK,LCK,PLCG1,Trac,Trbc2
Cargo recognition for clathrin-mediated endocytosis	0.778	0.028	#NUM!	CD3D,CD3G,REPS1
Post-translational protein phosphorylation	0.778	0.028	#NUM!	APOE,IGFBP4,QSOX1
Cell Cycle Control of Chromosomal Replication	0.776	0.0357	#NUM!	MCM2,RPA3
EGF Signaling	0.776	0.0357	#NUM!	CSNK2A1,PLCG1
Inhibition of ARE-Mediated mRNA Degradation Pathway	0.775	0.0245	1	EDC3,PABPN1,PRKAG1,ZFP36
Oxytocin Signaling Pathway	0.773	0.0213	0.816	ATP2B1,Calm1 (includes others),PPARG,PRKAG1,PRKCQ,RRAS2
Glutamate and glutamine metabolism	0.772	0.0714	#NUM!	PYCR2
DNA Double-Strand Break Repair by Non-Homologous End Joining	0.772	0.0714	#NUM!	XRCC6
Leukotriene Biosynthesis	0.772	0.0714	#NUM!	MGST2
ISGylation Signaling Pathway	0.77	0.0278	#NUM!	IRF5,IRF8,S100A4
Hepatic Cholestasis	0.766	0.0224	0.447	ADCY6,Calm1 (includes others),IRAK3,PRKAG1,PRKCQ
Interleukin-4 and Interleukin-13 signaling	0.753	0.0273	#NUM!	JUNB,PIM1,SOCS1
Signaling by PDGF	0.752	0.0345	#NUM!	NCK2,PLCG1
Iron uptake and transport	0.752	0.0345	#NUM!	FTH1,GLRX3
Cancer Drug Resistance by Drug Efflux	0.752	0.0345	#NUM!	ARAF,RRAS2
Processing of Capped Intron-Containing Pre-mRNA	0.749	0.0209	2.449	LSM6,PABPN1,PCBP2,RBM22,SF3B6,SYF2
Cardiac Hypertrophy Signaling (Enhanced)	0.748	0.0185	1.414	ADCY6,Calm1 (includes others),CYBB,ITGAE,ITGAV,PLCG1,PRKAG1,PRKCQ,RRAS2,SMO
Mismatch Repair	0.745	0.0667	#NUM!	RPA3
Response of EIF2AK1 (HRI) to heme deficiency	0.745	0.0667	#NUM!	ATF3
Telomere Extension by Telomerase	0.745	0.0667	#NUM!	XRCC6
Signaling by ERBB4	0.741	0.0339	#NUM!	APOE,MXD4
Binding and Uptake of Ligands by Scavenger Receptors	0.738	0.0268	#NUM!	APOE,FTH1,IGKC
GABA receptor activation	0.729	0.0333	#NUM!	ADCY6,KCNJ6
PCP (Planar Cell Polarity) Pathway	0.729	0.0333	#NUM!	JUNB,SMO
Signal regulatory protein family interactions	0.719	0.0625	#NUM!	TYROBP
Chondroitin Sulfate Degradation (Metazoa)	0.719	0.0625	#NUM!	GM2A
Adenosine Nucleotides Degradation II	0.719	0.0625	#NUM!	ADA
Aldosterone Signaling in Epithelial Cells	0.719	0.0233	#NUM!	DUSP1,PLCG1,PRKCQ,SMO
Neurovascular Coupling Signaling Pathway	0.719	0.0216	0.447	Calm1 (includes others),KCNJ6,PRDX6,PRKAG1,TBXA2R
CDK5 Signaling	0.715	0.0261	#NUM!	ADCY6,PRKAG1,RRAS2
Histone Modification Signaling Pathway	0.713	0.0203	0	ATAD2B,CSNK2A1,PIM1,PSIP1,TGM2,XRCC6
Allograft Rejection Signaling	0.71	0.0184	#NUM!	CD3D,CD3E,CD3G,CD86,FCER1G,HLA-DQB1,IGKC,Trac,Trbc2
Cytoprotection by HMOX1	0.708	0.0323	#NUM!	COX20,SURF1
Amyotrophic Lateral Sclerosis Signaling	0.707	0.0259	#NUM!	BAX,GPX1,RNF19A
Signaling by ROBO receptors	0.707	0.0259	#NUM!	CLASP1,NCK2,ROBO2
WNT/β-catenin Signaling	0.707	0.023	1	CSNK2A1,SMO,SOX4,Tcf7
Cellular Effects of Sildenafil (Viagra)	0.705	0.0174	-0.577	ADCY6,ADGRE5,ADGRG5,Calm1 (includes others),CCR7,CCR9,MYL11,PPARG,PRKAG1,PRKD2,SMO,TBXA2R
Protein methylation	0.696	0.0588	#NUM!	EEF1AKMT1
Dermatan Sulfate Degradation (Metazoa)	0.696	0.0588	#NUM!	GM2A
Erythropoietin Signaling Pathway	0.695	0.0227	2	PLCG1,PRKCQ,RAC2,RRAS2
RAR Activation	0.688	0.0186	0	ADCY6,CSNK2A1,DUSP1,PPARG,PRKAG1,RAC2,RHOH,TGM2
Mitochondrial biogenesis	0.687	0.0312	#NUM!	PRKAG1,SSBP1
Semaphorin interactions	0.687	0.0312	#NUM!	FYN,TYROBP
Regulation of lipid metabolism by PPARalpha	0.685	0.0252	#NUM!	ABCA1,MED30,PPARG
MSP-RON Signaling in Macrophages Pathway	0.685	0.0252	#NUM!	HLA-DQB1,RRAS2,SOCS1
Nitric Oxide Signaling in the Cardiovascular System	0.678	0.025	#NUM!	Calm1 (includes others),PRKAG1,PRKCQ
Macroautophagy	0.677	0.0308	#NUM!	PRKAG1,WDR45
Induction of Apoptosis by HIV1	0.677	0.0308	#NUM!	BAX,SLC25A4
Metabolism of Angiotensinogen to Angiotensins	0.674	0.0556	#NUM!	CTSZ
CCR5 Signaling in Macrophages	0.673	0.018	#NUM!	Calm1 (includes others),CD3D,CD3E,CD3G,FCER1G,PLCG1,PRKCQ,Trac,Trbc2
WNT/Ca+ pathway	0.667	0.0303	#NUM!	PLCG1,SMO
Glutamate Receptor Signaling	0.667	0.0303	#NUM!	Calm1 (includes others),PICK1
Role of Osteoblasts in Rheumatoid Arthritis Signaling Pathway	0.66	0.0205	-1.342	CTSC,CTSW,CTSZ,SMO,Tcf7
Actin Cytoskeleton Signaling	0.66	0.0205	#NUM!	ITGAE,ITGAV,MYL11,RAC2,RRAS2
LXR/RXR Activation	0.658	0.0244	#NUM!	ABCA1,APOE,LYZ
Purine Nucleotides Degradation II (Aerobic)	0.653	0.0526	#NUM!	ADA
Regulation of Insulin-like Growth Factor (IGF) transport and uptake by IGFBPs	0.651	0.0242	#NUM!	APOE,IGFBP4,QSOX1
Remodeling of Epithelial Adherens Junctions	0.648	0.0294	#NUM!	TUBB,TUBG1
Type I Diabetes Mellitus Signaling	0.641	0.0177	0.447	CD3D,CD3E,CD3G,CD86,FCER1G,HLA-DQB1,SOCS1,Trac,Trbc2
Sensory processing of sound by inner hair cells of the cochlea	0.639	0.029	#NUM!	ATP2B1,TMIE
Agrin Interactions at Neuromuscular Junction	0.639	0.029	#NUM!	RAC2,RRAS2
Phospholipases	0.639	0.029	#NUM!	PLCG1,PRDX6
Cell Cycle: G1/S Checkpoint Regulation	0.639	0.029	#NUM!	CDKN2D,TFDP1
IL-4 Signaling	0.638	0.0173	0.632	CD3D,CD3E,CD3G,FCER1G,HLA-DQB1,RRAS2,SOCS1,TGM2,Trac,Trbc2
FXR/RXR Activation	0.634	0.0214	0	APOE,MGST2,PPARG,PRKAG1
TP53 Regulates Transcription of DNA Repair Genes	0.63	0.0286	#NUM!	CTDP1,NELFCD
Graft-versus-Host Disease Signaling	0.629	0.0179	#NUM!	CD3D,CD3E,CD3G,CD86,FCER1G,HLA-DQB1,Trac,Trbc2
Granulocyte Adhesion and Diapedesis	0.624	0.0212	#NUM!	Ccl2,CCR7,CCR9,SDC4
Systemic Lupus Erythematosus Signaling	0.62	0.0159	#NUM!	CD3D,CD3E,CD3G,CD86,FCER1G,FCGR2B,IGKC,Iglc2,INPP5D,LCK,LSM6,LYN,PLCG1,RRAS2,Snrpc,Trac,Trbc2
IL-6 Signaling	0.618	0.0233	#NUM!	CSNK2A1,RRAS2,SOCS1
Interleukin-7 signaling	0.615	0.0476	#NUM!	SOCS1
Synaptic adhesion-like molecules	0.615	0.0476	#NUM!	PTPRF
Nucleotide salvage	0.615	0.0476	#NUM!	ADA
Basal Cell Carcinoma Signaling	0.612	0.0278	#NUM!	SMO,Tcf7
Ephrin B Signaling	0.612	0.0278	#NUM!	NCK2,RAC2
Amyloid fiber formation	0.603	0.0274	#NUM!	APOE,LYZ
Response to elevated platelet cytosolic Ca2+	0.6	0.0227	#NUM!	CTSW,PSAP,QSOX1
trans-Golgi Network Vesicle Budding	0.595	0.027	#NUM!	CTSZ,FTH1
Atherosclerosis Signaling	0.594	0.0226	#NUM!	APOE,LYZ,PRDX6
CCR3 Signaling in Eosinophils	0.588	0.0224	#NUM!	Calm1 (includes others),PRKCQ,RRAS2
Surfactant metabolism	0.581	0.0435	#NUM!	NAPSA
Apelin Cardiac Fibroblast Signaling Pathway	0.581	0.0435	#NUM!	PRKAG1
Plasma lipoprotein assembly, remodeling, and clearance	0.579	0.0263	#NUM!	ABCA1,APOE
SUMOylation of DNA damage response and repair proteins	0.579	0.0263	#NUM!	NSMCE1,XPC
Angiopoietin Signaling	0.579	0.0263	#NUM!	DOK2,RRAS2
SNARE Signaling Pathway	0.576	0.0221	#NUM!	ADCY6,Calm1 (includes others),PRKAG1
Role of PKR in Interferon Induction and Antiviral Response	0.576	0.0221	#NUM!	ATF3,BAX,TRAF3
Oxytocin in Brain Signaling Pathway	0.574	0.0201	1	Calm1 (includes others),PRDX6,PRKCQ,RRAS2
DHCR24 Signaling Pathway	0.57	0.0219	#NUM!	APOE,PRKCQ,RRAS2
Adrenergic Receptor Signaling Pathway (Enhanced)	0.57	0.02	2	ADCY6,PLCG1,PRKAG1,PRKCQ
RAS processing	0.565	0.0417	#NUM!	PRKCQ
Tumoricidal Function of Hepatic Natural Killer Cells	0.565	0.0417	#NUM!	BAX
Methionine Degradation I (to Homocysteine)	0.565	0.0417	#NUM!	EEF1AKMT1
ILK Signaling	0.565	0.0199	#NUM!	ILKAP,NCK2,RAC2,RHOH
Role of WNT/GSK-3β Signaling in the Pathogenesis of Influenza	0.563	0.0256	#NUM!	SMO,Tcf7
Toll-like Receptor Signaling	0.563	0.0256	#NUM!	IRAK3,TRAF4
CDX Gastrointestinal Cancer Signaling Pathway	0.56	0.0198	-1	CYBB,RAC2,SMO,Tcf7
GABAergic Receptor Signaling Pathway (Enhanced)	0.559	0.0216	#NUM!	ADCY6,KCNJ6,PRKAG1
Adipogenesis pathway	0.559	0.0216	#NUM!	CEBPA,PPARG,SMO
DDX58/IFIH1-mediated induction of interferon-alpha/beta	0.555	0.0253	#NUM!	PCBP2,TRAF3
Signaling by MET	0.555	0.0253	#NUM!	PTPRJ,SPINT2
Renal Cell Carcinoma Signaling	0.555	0.0253	#NUM!	FH,RRAS2
Role of JAK family kinases in IL-6-type Cytokine Signaling	0.555	0.0253	#NUM!	JUNB,SOCS1
MSP-RON Signaling in Cancer Cells Pathway	0.553	0.0214	#NUM!	ARAF,RRAS2,Tcf7
T Helper Cell Differentiation	0.552	0.017	#NUM!	CD3D,CD3E,CD3G,CD86,FCER1G,HLA-DQB1,Trac,Trbc2
Glycosaminoglycan metabolism	0.548	0.025	#NUM!	B4GALT7,SDC4
G alpha (12/13) signalling events	0.548	0.025	#NUM!	BTK,TBXA2R
Dopamine Receptor Signaling	0.548	0.025	#NUM!	ADCY6,PRKAG1
Xenobiotic Metabolism General Signaling Pathway	0.537	0.021	#NUM!	MGST2,PRKCQ,RRAS2
Fertilization	0.536	0.0385	#NUM!	IZUMO4
Role of JAK1, JAK2 and TYK2 in Interferon Signaling	0.536	0.0385	#NUM!	SOCS1
Estrogen-mediated S-phase Entry	0.536	0.0385	#NUM!	TFDP1
D-myo-inositol (1,4,5)-Trisphosphate Biosynthesis	0.536	0.0385	#NUM!	PLCG1
Cysteine Biosynthesis III (mammalia)	0.536	0.0385	#NUM!	EEF1AKMT1
Clathrin-mediated Endocytosis Signaling	0.534	0.0192	#NUM!	APOE,CSNK2A1,LYZ,MYO1E
PI Metabolism	0.533	0.0244	#NUM!	INPP5D,INPP5K
FLT3 Signaling in Hematopoietic Progenitor Cells	0.533	0.0244	#NUM!	INPP5D,RRAS2
JAK/STAT Signaling	0.533	0.0244	#NUM!	RRAS2,SOCS1
OX40 Signaling Pathway	0.532	0.0167	0.447	CD3D,CD3E,CD3G,FCER1G,HLA-DQB1,Trac,TRAF3,Trbc2
Agranulocyte Adhesion and Diapedesis	0.525	0.019	#NUM!	Ccl2,CCR7,CCR9,SDC4
ATF4 activates genes in response to endoplasmic reticulum stress	0.522	0.037	#NUM!	ATF3
Pyroptosis	0.522	0.037	#NUM!	BAX
Fatty acyl-CoA biosynthesis	0.522	0.037	#NUM!	HACD3
PEDF Signaling	0.519	0.0238	#NUM!	PPARG,RRAS2
Lipid Antigen Presentation by CD1	0.515	0.0169	1.134	CD3D,CD3E,CD3G,FCER1G,PSAP,Trac,Trbc2
Integrin cell surface interactions	0.512	0.0235	#NUM!	ITGAE,ITGAV
LPS-stimulated MAPK Signaling	0.512	0.0235	#NUM!	PRKCQ,RRAS2
SUMOylation of intracellular receptors	0.509	0.0357	#NUM!	PPARG
RNA Polymerase II Transcription	0.506	0.0201	#NUM!	CTDP1,NELFCD,PABPN1
Oxidative Stress Induced Senescence	0.505	0.0233	#NUM!	CDKN2D,TFDP1
Cyclins and Cell Cycle Regulation	0.505	0.0233	#NUM!	CDKN2D,TFDP1
Dilated Cardiomyopathy Signaling Pathway	0.501	0.02	#NUM!	ADCY6,BAX,PRKAG1
PTEN Regulation	0.501	0.02	#NUM!	CSNK2A1,PPARG,TRIM27
Energy dependent regulation of mTOR by LKB1-AMPK	0.496	0.0345	#NUM!	PRKAG1
Processing of Capped Intronless Pre-mRNA	0.496	0.0345	#NUM!	PABPN1
Autophagy	0.496	0.0184	0	Calm1 (includes others),PRKAG1,PRKCQ,TRAF3
Transcriptional regulation by RUNX1	0.491	0.0197	#NUM!	CSNK2A1,LGALS3,MYB
Protein ubiquitination	0.484	0.0333	#NUM!	UBA1
Nucleotide catabolism	0.484	0.0333	#NUM!	DPYD
Unfolded protein response	0.479	0.0222	#NUM!	CEBPA,PPARG
Necroptosis Signaling Pathway	0.477	0.0194	#NUM!	CYBB,SLC25A4,TOMM20
KEAP1-NFE2L2 pathway	0.473	0.022	#NUM!	CSNK2A1,UFD1
Heparan Sulfate Biosynthesis	0.473	0.022	#NUM!	B4GALT7,PRDX6
BMP signaling pathway	0.473	0.022	#NUM!	PRKAG1,RRAS2
Toll-like Receptor Cascades	0.473	0.0323	#NUM!	LY86
Role of Pattern Recognition Receptors in Recognition of Bacteria and Viruses	0.472	0.0192	#NUM!	C1QB,PRKCQ,SYK
Toll Like Receptor 3 (TLR3) Cascade	0.462	0.0312	#NUM!	TRAF3
G-protein beta:gamma signalling	0.462	0.0312	#NUM!	BTK
Glutamate binding, activation of AMPA receptors and synaptic plasticity	0.462	0.0312	#NUM!	PICK1
NAFLD Signaling Pathway	0.461	0.0177	0	BAX,PRKAG1,PRKCQ,SOCS1
Signal amplification	0.451	0.0303	#NUM!	TBXA2R
HEY1 Signaling Pathway	0.45	0.0186	#NUM!	BAX,NTRK3,PRKAG1
Senescence Pathway	0.447	0.0167	1.342	ARAF,ATF3,Calm1 (includes others),RRAS2,YPEL3
Mitochondrial translation	0.443	0.0208	#NUM!	MRPL58,MRPS9
Transcriptional Regulation by E2F6	0.441	0.0294	#NUM!	TFDP1
Inhibition of Angiogenesis by TSP1	0.441	0.0294	#NUM!	FYN
UVA-Induced MAPK Signaling	0.432	0.0204	#NUM!	PLCG1,RRAS2
PRC2 methylates histones and DNA	0.431	0.0286	#NUM!	JARID2
VEGF Signaling	0.427	0.0202	#NUM!	PLCG1,RRAS2
HMGB1 Signaling	0.424	0.018	#NUM!	RAC2,RHOH,RRAS2
RHO GTPases Activate WASPs and WAVEs	0.421	0.0278	#NUM!	BTK
Transcriptional regulation by the AP-2 (TFAP2) family of transcription factors	0.421	0.0278	#NUM!	APOE
Androgen Signaling	0.416	0.0178	#NUM!	Calm1 (includes others),PRKAG1,PRKCQ
MyD88-independent TLR4 cascade	0.412	0.027	#NUM!	TRAF3
TWEAK Signaling	0.412	0.027	#NUM!	TRAF3
Complement System	0.412	0.027	#NUM!	C1QB
SUMOylation of ubiquitinylation proteins	0.403	0.0263	#NUM!	TRIM27
Glutathione-mediated Detoxification	0.403	0.0263	#NUM!	MGST2
FcγRIIB Signaling in B Lymphocytes	0.4	0.0151	-0.447	BTK,FCGR2B,IGKC,Iglc2,INPP5D,LYN,RRAS2,SYK
G alpha (q) signalling events	0.397	0.0172	#NUM!	BTK,RGS1,TBXA2R
tRNA Charging	0.394	0.0256	#NUM!	NARS2
Superpathway of Methionine Degradation	0.394	0.0256	#NUM!	EEF1AKMT1
Inhibition of Matrix Metalloproteases	0.394	0.0256	#NUM!	RECK
Antigen Presentation Pathway	0.394	0.0256	#NUM!	HLA-DQB1
WNK Renal Signaling Pathway	0.39	0.0189	#NUM!	Calm1 (includes others),PRKCQ
Signaling by FGFR3	0.386	0.025	#NUM!	PLCG1
PPAR Signaling	0.386	0.0187	#NUM!	PPARG,RRAS2
Transport of vitamins, nucleosides, and related molecules	0.378	0.0244	#NUM!	SLC25A4
Signaling by FGFR4	0.378	0.0244	#NUM!	PLCG1
Mechanisms of Viral Exit from Host Cells	0.378	0.0244	#NUM!	PRKCQ
Formation of WDR5-containing histone-modifying complexes	0.37	0.0238	#NUM!	PSIP1
April Mediated Signaling	0.37	0.0238	#NUM!	TRAF3
Signaling by Insulin receptor	0.362	0.0233	#NUM!	PTPRF
Vasopressin regulates renal water homeostasis via Aquaporins	0.362	0.0233	#NUM!	ADCY6
B Cell Activating Factor Signaling	0.362	0.0233	#NUM!	TRAF3
Oncostatin M Signaling	0.362	0.0233	#NUM!	RRAS2
Retinoate Biosynthesis I	0.362	0.0233	#NUM!	Akr1c12/Akr1c13
Regulation of eIF4 and p70S6K Signaling	0.36	0.0163	#NUM!	ITGAE,ITGAV,RRAS2
Hedgehog 'off' state	0.358	0.0177	#NUM!	ADCY6,SMO
Acute Phase Response Signaling	0.357	0.0162	#NUM!	C1QB,RRAS2,SOCS1
Elastic fibre formation	0.355	0.0227	#NUM!	ITGAV
Regulation of mRNA stability by proteins that bind AU-rich elements	0.355	0.0227	#NUM!	ZFP36
TP53 Regulates Transcription of Cell Death Genes	0.355	0.0227	#NUM!	BAX
BER (Base Excision Repair) Pathway	0.355	0.0227	#NUM!	MBD4
Prostate Cancer Signaling	0.354	0.0175	#NUM!	RRAS2,TFDP1
Antioxidant Action of Vitamin C	0.354	0.0175	#NUM!	PLCG1,PRDX6
Arachidonic acid metabolism	0.348	0.0222	#NUM!	GPX1
Interleukin-10 signaling	0.348	0.0222	#NUM!	CD86
GPER1 signaling	0.348	0.0222	#NUM!	ADCY6
Coronavirus Replication Pathway	0.348	0.0222	#NUM!	TUBB
Bladder Cancer Signaling	0.345	0.0172	#NUM!	RRAS2,TFDP1
Th17 Activation Pathway	0.344	0.0145	#NUM!	CD3D,CD3E,CD3G,FCER1G,IRAK3,Trac,Trbc2
Communication between Innate and Adaptive Immune Cells	0.344	0.0139	-1.342	CCR7,CD3D,CD3E,CD3G,CD83,CD86,CD8A,CD8B,FCER1G,IGKC,Iglc2,Trac,Trbc2
NOD1/2 Signaling Pathway	0.344	0.0159	#NUM!	IRF5,TRAF3,TRIM27
Deubiquitination	0.342	0.0152	1	STAMBPL1,TOMM20,TRAF3,UFD1
Cytosolic sensors of pathogen-associated DNA	0.341	0.0217	#NUM!	XRCC6
Role of RIG1-like Receptors in Antiviral Innate Immunity	0.341	0.0217	#NUM!	TRAF3
Role of OCT4 in Mammalian Embryonic Stem Cell Pluripotency	0.341	0.0217	#NUM!	JARID2
Apelin Pancreas Signaling Pathway	0.341	0.0217	#NUM!	PRKAG1
Regulation of the Epithelial Mesenchymal Transition by Growth Factors Pathway	0.334	0.0156	#NUM!	ARAF,ID2,RRAS2
Synthesis of DNA	0.333	0.0168	#NUM!	MCM2,RPA3
Hepatic Fibrosis / Hepatic Stellate Cell Activation	0.328	0.0155	#NUM!	BAX,CCR7,IGFBP4
Meiotic recombination	0.328	0.0208	#NUM!	RPA3
nNOS Signaling in Skeletal Muscle Cells	0.328	0.0208	#NUM!	Calm1 (includes others)
Apelin Muscle Signaling Pathway	0.328	0.0208	#NUM!	PRKAG1
Xenobiotic Metabolism PXR Signaling Pathway	0.324	0.0154	#NUM!	MGST2,PRKAG1,PRKCQ
Nonhomologous End-Joining (NHEJ)	0.321	0.0204	#NUM!	XRCC6
Nucleosome assembly	0.321	0.0204	#NUM!	CENPM
PFKFB4 Signaling Pathway	0.321	0.0204	#NUM!	PRKAG1
Cell Cycle Checkpoints	0.318	0.0147	1	CENPM,CLASP1,MCM2,RPA3
Signaling by EGFR	0.315	0.02	#NUM!	PLCG1
Signaling by FGFR1	0.315	0.02	#NUM!	PLCG1
Melanoma Signaling	0.315	0.02	#NUM!	RRAS2
Role of NANOG in Mammalian Embryonic Stem Cell Pluripotency	0.313	0.0161	#NUM!	RRAS2,SMO
RHOA Signaling	0.313	0.0161	#NUM!	ARHGAP9,MYL11
Cytotoxic T Lymphocyte-mediated Apoptosis of Target Cells	0.312	0.0141	1	CD3D,CD3E,CD3G,FCER1G,Trac,Trbc2
Antiproliferative Role of TOB in T Cell Signaling	0.31	0.0141	#NUM!	CD3D,CD3E,CD3G,FCER1G,Trac,Trbc2
L1CAM interactions	0.309	0.016	#NUM!	CSNK2A1,ITGAV
Cell Cycle: G2/M DNA Damage Checkpoint Regulation	0.309	0.0196	#NUM!	CKS1B
p70S6K Signaling	0.307	0.0138	0	BTK,IGKC,Iglc2,LYN,PLCG1,PRKCQ,RRAS2,SYK
Pancreatic Adenocarcinoma Signaling	0.306	0.0159	#NUM!	RALGDS,TFDP1
UVB-Induced MAPK Signaling	0.303	0.0192	#NUM!	PRKCQ
Intra-Golgi and retrograde Golgi-to-ER traffic	0.301	0.0148	#NUM!	DCTN3,KLC2,RIC1
Coronavirus Pathogenesis Pathway	0.298	0.0147	#NUM!	BAX,TFDP1,TRAF3
Signaling by TGF-beta Receptor Complex	0.297	0.0189	#NUM!	ITGAV
Spliceosomal Cycle	0.297	0.0189	#NUM!	SF3B6
Phototransduction Pathway	0.292	0.0185	#NUM!	PRKAG1
Huntington's Disease Signaling	0.289	0.0141	#NUM!	BAX,PACSIN1,PRKCQ,TGM2
HSP90 chaperone cycle for steroid hormone receptors in the presence of ligand	0.286	0.0182	#NUM!	DCTN3
Sensory processing of sound by outer hair cells of the cochlea	0.286	0.0182	#NUM!	TMIE
SUMOylation of chromatin organization proteins	0.281	0.0179	#NUM!	SATB1
Folate Signaling Pathway	0.281	0.0179	#NUM!	SHMT2
Activin Inhibin Signaling Pathway	0.279	0.0142	#NUM!	CEBPA,IGKC,PPARG
CD27 Signaling in Lymphocytes	0.276	0.0175	#NUM!	CD27
CNTF Signaling	0.276	0.0175	#NUM!	RRAS2
FAT10 Signaling Pathway	0.276	0.0175	#NUM!	UBA1
Complement cascade	0.274	0.0148	#NUM!	C1QB,IGKC
RUNX1 regulates megakaryocyte differentiation and platelet function	0.271	0.0172	#NUM!	PRKCQ
Pathogen Induced Cytokine Storm Signaling Pathway	0.268	0.0135	-2.236	Ccl2,FTH1,HLA-DQB1,PRDM1,SYK
NFKBIE Signaling Pathway	0.267	0.0134	1.633	CD3D,CD3E,CD3G,FCER1G,Trac,Trbc2
Iron homeostasis signaling pathway	0.265	0.0145	#NUM!	FTH1,NUBP2
RHO GTPases Activate Formins	0.262	0.0144	#NUM!	CENPM,CLASP1
Visual phototransduction	0.261	0.0167	#NUM!	PRKCQ
Endometrial Cancer Signaling	0.261	0.0167	#NUM!	RRAS2
Triacylglycerol Degradation	0.261	0.0167	#NUM!	PRDX6
NCAM signaling for neurite out-growth	0.256	0.0164	#NUM!	FYN
Kinesins	0.256	0.0164	#NUM!	KLC2
Chondroitin Sulfate Biosynthesis	0.256	0.0164	#NUM!	B4GALT7
Calcium Signaling	0.256	0.0136	#NUM!	ATP2B1,Calm1 (includes others),PRKAG1
Role of Chondrocytes in Rheumatoid Arthritis Signaling Pathway	0.256	0.0142	#NUM!	CEBPA,PRKAG1
UFMylation Signaling Pathway	0.252	0.0161	#NUM!	ABCA1
Role of JAK2 in Hormone-like Cytokine Signaling	0.252	0.0161	#NUM!	SOCS1
Transcriptional Regulation by MECP2	0.247	0.0159	#NUM!	PPARG
Dermatan Sulfate Biosynthesis	0.247	0.0159	#NUM!	B4GALT7
G alpha (s) signalling events	0.244	0.0138	#NUM!	ADCY6,RAMP1
RAB geranylgeranylation	0.239	0.0154	#NUM!	RAB32
PXR/RXR Activation	0.239	0.0154	#NUM!	PRKAG1
Activation of IRF by Cytosolic Pattern Recognition Receptors	0.239	0.0154	#NUM!	TRAF3
ERB2-ERBB3 Signaling	0.239	0.0154	#NUM!	RRAS2
Role of Osteoblasts, Osteoclasts and Chondrocytes in Rheumatoid Arthritis	0.238	0.0132	#NUM!	Calm1 (includes others),SMO,Tcf7
CD40 Signaling	0.23	0.0149	#NUM!	TRAF3
NAD Signaling Pathway	0.227	0.0132	#NUM!	LDHB,PRKAG1
TNFR2 non-canonical NF-kB pathway	0.226	0.0147	#NUM!	TRAF3
SPINK1 General Cancer Pathway	0.222	0.0145	#NUM!	RRAS2
ISG15 antiviral mechanism	0.215	0.0141	#NUM!	PLCG1
Translocation of SLC2A4 (GLUT4) to the plasma membrane	0.215	0.0141	#NUM!	PRKAG1
Telomere Maintenance	0.208	0.0137	#NUM!	RPA3
Senescence-Associated Secretory Phenotype (SASP)	0.208	0.0137	#NUM!	CDKN2D
Signaling by FGFR2	0.208	0.0137	#NUM!	PLCG1
ERK5 Signaling	0.204	0.0135	#NUM!	RRAS2
Pre-NOTCH Expression and Processing	0.197	0.0132	#NUM!	TFDP1
Wound Healing Signaling Pathway	0	0.00397	#NUM!	RRAS2
Immunogenic Cell Death Signaling Pathway	0	0.0111	#NUM!	BAX
MicroRNA Biogenesis Signaling Pathway	0	0.0107	#NUM!	DROSHA,RRAS2
Chaperone Mediated Autophagy Signaling Pathway	0	0.011	1.89	CD3D,CD3E,CD3G,FCER1G,PRKAG1,Trac,Trbc2
IL-33 Signaling Pathway	0	0.0108	#NUM!	PRKAG1,SYK
ABRA Signaling Pathway	0	0.0109	#NUM!	JUNB
Cachexia Signaling Pathway	0	0.0109	2	ADCY6,PPARG,PRKAG1,PRKCQ
Microautophagy Signaling Pathway	0	0.0125	#NUM!	PRKAG1,TOMM20
Sertoli Cell-Germ Cell Junction Signaling Pathway (Enhanced)	0	0.0127	#NUM!	PRKAG1,RAC2,RRAS2
LPS/IL-1 Mediated Inhibition of RXR Function	0	0.0117	#NUM!	ABCA1,APOE,MGST2
p53 Signaling	0	0.0102	#NUM!	BAX
Opioid Signalling	0	0.0111	#NUM!	ADCY6
Potassium Channels	0	0.00971	#NUM!	KCNJ6
Extracellular matrix organization	0	0.00943	#NUM!	ITGAV
p75 NTR receptor-mediated signalling	0	0.01	#NUM!	BEX3
Degradation of beta-catenin by the destruction complex	0	0.0109	#NUM!	Tcf7
TCF dependent signaling in response to WNT	0	0.0101	#NUM!	CSNK2A1,SOX4
Generic Transcription Pathway	0	0.0117	1.342	MED30,PPARG,ZNF519,ZNF771,ZNF799
Mitotic Metaphase and Anaphase	0	0.00851	#NUM!	CENPM,CLASP1
Cellular response to heat stress	0	0.0103	#NUM!	RPA3
Class A/1 (Rhodopsin-like receptors)	0	0.0126	1	CCR7,CCR9,PSAP,TBXA2R
Beta-catenin independent WNT signaling	0	0.0098	#NUM!	RAC2
Platelet homeostasis	0	0.0116	#NUM!	ATP2B1
Activation of NMDA receptors and postsynaptic events	0	0.0119	#NUM!	PRKAG1
Interleukin-1 family signaling	0	0.00775	#NUM!	IRAK3
Cardiac conduction	0	0.00769	#NUM!	ATP2B1
Hedgehog 'on' state	0	0.0116	#NUM!	SMO
HDR through Homologous Recombination (HRR) or Single Strand Annealing (SSA)	0	0.00893	#NUM!	RPA3
RNA polymerase II transcribes snRNA genes	0	0.012	#NUM!	POU2F2
COPI-mediated anterograde transport	0	0.0098	#NUM!	DCTN3
DNA Replication Pre-Initiation	0	0.00962	#NUM!	MCM2
ESR-mediated signaling	0	0.00847	#NUM!	MYB
Response of EIF2AK4 (GCN2) to amino acid deficiency	0	0.00971	#NUM!	ATF3
Ion channel transport	0	0.00546	#NUM!	ATP2B1
Autism Signaling Pathway	0	0.00974	#NUM!	PRKAG1,RRAS2,SMO
CGAS-STING Signaling Pathway	0	0.00714	#NUM!	BAX
IL-27 Signaling Pathway	0	0.00781	#NUM!	IRF8
Sleep REM Signaling Pathway	0	0.00901	#NUM!	PRKAG1
Cohesin Chromatin Regulation Pathway	0	0.0121	#NUM!	CEBPA,MED30,PCDH9
Ceramide Signaling	0	0.011	#NUM!	RRAS2
Tight Junction Signaling	0	0.0111	#NUM!	CEBPA,PRKAG1
TR/RXR Activation	0	0.00781	#NUM!	PPARG
Role of BRCA1 in DNA Damage Response	0	0.0125	#NUM!	FAAP24
IL-17 Signaling	0	0.00535	#NUM!	RRAS2
IL-15 Signaling	0	0.00951	#NUM!	IGKC,Iglc2,LCK,RRAS2,SYK
Relaxin Signaling	0	0.0129	#NUM!	ADCY6,PRKAG1
Maturity Onset Diabetes of Young (MODY) Signaling	0	0.0127	#NUM!	APOE
DNA Methylation and Transcriptional Repression Signaling	0	0.0102	#NUM!	MBD4
Antiproliferative Role of Somatostatin Receptor 2	0	0.013	#NUM!	RRAS2
EIF2 Signaling	0	0.0087	#NUM!	ATF3,RRAS2
AMPK Signaling	0	0.00826	#NUM!	ILKAP,PRKAG1
Altered T Cell and B Cell Signaling in Rheumatoid Arthritis	0	0.0117	#NUM!	CD3D,CD3E,CD3G,CD86,FCER1G,HLA-DQB1,IGKC,Iglc2,Trac,TRAF3,Trbc2
Estrogen-Dependent Breast Cancer Signaling	0	0.0122	#NUM!	RRAS2
B Cell Development	0	0.0082	#NUM!	CD86,HLA-DQB1,IGKC,Iglc2
RANK Signaling in Osteoclasts	0	0.011	#NUM!	Calm1 (includes others)
Neuroprotective Role of THOP1 in Alzheimer's Disease	0	0.0082	#NUM!	PRKAG1
Sertoli Cell-Sertoli Cell Junction Signaling	0	0.0123	#NUM!	RRAS2,TUBB,TUBG1
Telomerase Signaling	0	0.00926	#NUM!	RRAS2
Transcriptional Regulatory Network in Embryonic Stem Cells	0	0.0122	#NUM!	RRAS2,SMO
Heparan Sulfate Biosynthesis (Late Stages)	0	0.0119	#NUM!	PRDX6
Cardiac β-adrenergic Signaling	0	0.0111	#NUM!	ADCY6,PRKAG1
Protein Ubiquitination Pathway	0	0.00733	#NUM!	SMO,UBA1
FGF Signaling	0	0.0116	#NUM!	PLCG1
GABA Receptor Signaling	0	0.00758	#NUM!	ADCY6
Xenobiotic Metabolism Signaling	0	0.0102	#NUM!	MGST2,PRKCQ,RRAS2
TGF-β Signaling	0	0.0103	#NUM!	RRAS2
Gustation Pathway	0	0.00985	#NUM!	ADCY6,PRKAG1
HOTAIR Regulatory Pathway	0	0.0123	#NUM!	JARID2,Tcf7
BEX2 Signaling Pathway	0	0.0122	#NUM!	Tcf7
Xenobiotic Metabolism AHR Signaling Pathway	0	0.0115	#NUM!	MGST2
Xenobiotic Metabolism CAR Signaling Pathway	0	0.0103	#NUM!	MGST2,PRKCQ
Tumor Microenvironment Pathway	0	0.0112	#NUM!	ARAF,RRAS2

## Sheet: IPA_C0
Ingenuity Canonical Pathways	-log(p-value)	Ratio	z-score	Molecules
Neutrophil degranulation	6.89	0.0294	0.535	ANXA2,ARHGAP9,CD68,CTSB,CTSZ,CYBA,DYNC1H1,DYNLL1,ITGAM,LAMP2,LRG1,PSAP,S100A8,SIRPB1
Eukaryotic Translation Termination	5.09	0.0638	-2.449	RPL35,RPL37A,RPL38,RPS18,RPS19,RPS3
Eukaryotic Translation Elongation	5.07	0.0632	-2.449	RPL35,RPL37A,RPL38,RPS18,RPS19,RPS3
Response of EIF2AK4 (GCN2) to amino acid deficiency	4.86	0.0583	-2.449	RPL35,RPL37A,RPL38,RPS18,RPS19,RPS3
Selenoamino acid metabolism	4.77	0.0561	-2.449	RPL35,RPL37A,RPL38,RPS18,RPS19,RPS3
SRP-dependent cotranslational protein targeting to membrane	4.59	0.0522	-2.449	RPL35,RPL37A,RPL38,RPS18,RPS19,RPS3
Nonsense-Mediated Decay (NMD)	4.55	0.0513	-2.449	RPL35,RPL37A,RPL38,RPS18,RPS19,RPS3
Eukaryotic Translation Initiation	4.45	0.0492	-2.449	RPL35,RPL37A,RPL38,RPS18,RPS19,RPS3
Major pathway of rRNA processing in the nucleolus and cytosol	4.35	0.0376	-1.89	RIOK3,RPL35,RPL37A,RPL38,RPS18,RPS19,RPS3
EIF2 Signaling	3.78	0.0304	-1	PIK3R1,RPL35,RPL37A,RPL38,RPS18,RPS19,RPS3
Phagosome Maturation	3.74	0.0366	#NUM!	CTSB,CTSE,CTSZ,DYNC1H1,DYNLL1,LAMP2
Interleukin-4 and Interleukin-13 signaling	3.62	0.0455	2.236	ANXA1,BCL6,IRF4,ITGAM,PIK3R1
MHC class II antigen presentation	3.35	0.0397	-0.447	CTSB,CTSE,DYNC1H1,DYNLL1,LGMN
Gene and protein expression by JAK-STAT signaling after IL-12 stimulation	3.07	0.0811	#NUM!	ANXA2,HNRNPA2B1,LMNB1
Smooth Muscle Contraction	2.88	0.0698	#NUM!	ANXA1,ANXA2,ANXA6
Trafficking and processing of endosomal TLR	2.72	0.154	#NUM!	CTSB,LGMN
Regulation of eIF4 and p70S6K Signaling	2.62	0.0272	#NUM!	ITGAM,PIK3R1,RPS18,RPS19,RPS3
Macrophage Alternative Activation Signaling Pathway	2.56	0.0263	1.342	IGHM,IRF4,NR1H3,PIK3R1,TSC22D3
D-myo-inositol (1,4,5)-trisphosphate Degradation	2.54	0.125	#NUM!	INPP5A,INPP5K
1D-myo-inositol Hexakisphosphate Biosynthesis II (Mammalian)	2.49	0.118	#NUM!	INPP5A,INPP5K
D-myo-inositol (1,3,4)-trisphosphate Biosynthesis	2.49	0.118	#NUM!	INPP5A,INPP5K
Class I peroxisomal membrane protein import	2.35	0.1	#NUM!	ABCD2,PXMP4
mTOR Signaling	2.34	0.0234	#NUM!	PIK3R1,PRKAG1,RPS18,RPS19,RPS3
Nuclear Cytoskeleton Signaling Pathway	2.29	0.0227	1.342	DYNC1H1,DYNLL1,ITGAM,LMNB1,SYNE2
RHO GTPases Activate NADPH Oxidases	2.27	0.0909	#NUM!	CYBA,S100A8
Superpathway of D-myo-inositol (1,4,5)-trisphosphate Metabolism	2.27	0.0909	#NUM!	INPP5A,INPP5K
IL-12 Signaling and Production in Macrophages	2.22	0.0219	-2.236	IGHM,ITGAM,PIK3R1,PRKAG1,S100A8
Osteoarthritis Pathway	2.16	0.0212	#NUM!	ANXA2,CASP4,ITGAM,PRKAG1,S100A8
IL-7 Signaling Pathway	2.14	0.0385	#NUM!	BCL6,IGHM,PIK3R1
Fatty acyl-CoA biosynthesis	2.09	0.0741	#NUM!	HACD3,MORC2
PI Metabolism	2.09	0.0366	#NUM!	INPP5K,PIK3R1,TNFAIP8L2
Nucleotide catabolism	2	0.0667	#NUM!	DPYD,SAMHD1
Signaling by CSF1 (M-CSF) in myeloid cells	1.97	0.0645	#NUM!	GAB3,PIK3R1
G alpha (q) signalling events	1.93	0.023	1	ANXA1,LTB4R,PIK3R1,RGS1
Uracil Degradation II (Reductive)	1.82	0.333	#NUM!	DPYD
Thymine Degradation	1.82	0.333	#NUM!	DPYD
S100 Family Signaling Pathway	1.79	0.0117	3	ADGRG5,ANXA1,ANXA2,CACNA1D,IGHM,LTB4R,PIK3R1,PRKAG1,S100A8
Leukocyte Extravasation Signaling	1.78	0.0207	0	ARHGAP9,CYBA,ITGAM,PIK3R1
DAP12 interactions	1.72	0.0476	#NUM!	PIK3R1,SIRPB1
Aggrephagy	1.7	0.0465	#NUM!	DYNC1H1,DYNLL1
Methylmalonyl Pathway	1.7	0.25	#NUM!	PCCB
Interleukin-2 family signaling	1.65	0.0435	#NUM!	INPP5K,PIK3R1
Apelin Pancreas Signaling Pathway	1.65	0.0435	#NUM!	PIK3R1,PRKAG1
Nitric Oxide Signaling in the Cardiovascular System	1.64	0.025	#NUM!	CACNA1D,PIK3R1,PRKAG1
2-oxobutanoate Degradation I	1.6	0.2	#NUM!	PCCB
NR1H2 and NR1H3-mediated signaling	1.58	0.04	#NUM!	MOV10,NR1H3
RHO GTPase cycle	1.58	0.0133	1.633	ARHGAP9,CDC42EP3,CYBA,LMNB1,PHIP,PIK3R1
NAFLD Signaling Pathway	1.56	0.0177	-2	CTSB,NR1H3,PIK3R1,PRKAG1
Meiotic synapsis	1.5	0.0364	#NUM!	LMNB1,SYNE2
HSP90 chaperone cycle for steroid hormone receptors in the presence of ligand	1.5	0.0364	#NUM!	DYNC1H1,DYNLL1
Interleukin-3, Interleukin-5 and GM-CSF signaling	1.5	0.0364	#NUM!	INPP5K,PIK3R1
Gαi Signaling	1.47	0.0214	#NUM!	LTB4R,PRKAG1,RGS14
Insulin Receptor Signaling	1.47	0.0214	#NUM!	INPP5K,PIK3R1,PRKAG1
Apelin Endothelial Signaling Pathway	1.46	0.0213	#NUM!	KLF2,PIK3R1,PRKAG1
RUNX1 regulates megakaryocyte differentiation and platelet function	1.46	0.0345	#NUM!	MOV10,RBBP5
MSP-RON Signaling Pathway	1.46	0.0345	#NUM!	ITGAM,PIK3R1
Role of Osteoblasts in Rheumatoid Arthritis Signaling Pathway	1.46	0.0164	-1	CTSB,CTSE,CTSZ,PIK3R1
Endocannabinoid Cancer Inhibition Pathway	1.42	0.0204	#NUM!	CASP4,PIK3R1,PRKAG1
NAD Signaling Pathway	1.39	0.0199	#NUM!	PARP4,PIK3R1,PRKAG1
PTEN Signaling	1.39	0.0199	#NUM!	INPP5K,ITGAM,PIK3R1
G alpha (i) signalling events	1.38	0.0155	0	ANXA1,PSAP,RGS1,RGS14
Type II Diabetes Mellitus Signaling	1.38	0.0196	#NUM!	CACNA1D,PIK3R1,PRKAG1
Macroautophagy	1.37	0.0308	#NUM!	DYNLL1,PRKAG1
Lipophagy	1.35	0.111	#NUM!	PRKAG1
Interferon alpha/beta signaling	1.3	0.0282	#NUM!	IRF4,SAMHD1
Pre-NOTCH Expression and Processing	1.25	0.0263	#NUM!	MAML1,MOV10
Leptin Signaling in Obesity	1.25	0.0263	#NUM!	PIK3R1,PRKAG1
Vitamin D (calciferol) metabolism	1.23	0.0833	#NUM!	LGMN
GP1b-IX-V activation signalling	1.23	0.0833	#NUM!	PIK3R1
Protein Sorting Signaling Pathway	1.22	0.0169	#NUM!	PRKAG1,SNX4,SNX6
Signaling by NTRK1 (TRKA)	1.2	0.0247	#NUM!	DNAL4,PIK3R1
Dissolution of Fibrin Clot	1.2	0.0769	#NUM!	ANXA2
IL-33 Signaling Pathway	1.18	0.0162	#NUM!	CASP4,PIK3R1,PRKAG1
Role of IL-17A in Psoriasis	1.17	0.0714	#NUM!	S100A8
BAG2 Signaling Pathway	1.17	0.0235	#NUM!	ANXA2,CTSB
PDGF Signaling	1.15	0.023	#NUM!	INPP5K,PIK3R1
Production of Nitric Oxide and Reactive Oxygen Species in Macrophages	1.14	0.0157	#NUM!	CYBA,PIK3R1,S100A8
TP53 Regulates Metabolic Genes	1.14	0.0227	#NUM!	MOV10,PRKAG1
Telomere Extension by Telomerase	1.14	0.0667	#NUM!	HNRNPA2B1
Regulation of the Epithelial-Mesenchymal Transition Pathway	1.12	0.0154	#NUM!	ID2,MAML1,PIK3R1
Signal regulatory protein family interactions	1.11	0.0625	#NUM!	SIRPB1
FOXO-mediated transcription of cell death genes	1.11	0.0625	#NUM!	BCL6
Granzyme B Signaling	1.11	0.0625	#NUM!	LMNB1
MAPK6/MAPK4 signaling	1.11	0.0217	#NUM!	CDC42EP3,MOV10
PI3K/AKT Signaling	1.1	0.015	#NUM!	INPP5K,ITGAM,PIK3R1
Human Embryonic Stem Cell Pluripotency	1.09	0.0149	#NUM!	ID2,KLF2,PIK3R1
Pyroptosis Signaling Pathway	1.09	0.0213	#NUM!	CASP4,PRKAG1
Interferon gamma signaling	1.09	0.0213	#NUM!	IRF4,TRIM5
Signaling by Type 1 Insulin-like Growth Factor 1 Receptor (IGF1R)	1.09	0.0588	#NUM!	PIK3R1
Signaling by NTRK3 (TRKC)	1.09	0.0588	#NUM!	PIK3R1
Mitotic Prometaphase	1.08	0.0148	#NUM!	DYNC1H1,DYNLL1,EML4
Coronavirus Pathogenesis Pathway	1.08	0.0147	#NUM!	RPS18,RPS19,RPS3
Metabolism of Angiotensinogen to Angiotensins	1.06	0.0556	#NUM!	CTSZ
Melanocyte Development and Pigmentation Signaling	1.06	0.0204	#NUM!	PIK3R1,PRKAG1
UVA-Induced MAPK Signaling	1.06	0.0204	#NUM!	PARP4,PIK3R1
Glycerophospholipid biosynthesis	1.05	0.0202	#NUM!	CDS2,DGAT2
Activin Inhibin Signaling Pathway	1.04	0.0142	#NUM!	IGHM,MXD1,PIK3R1
Cell surface interactions at the vascular wall	1.04	0.0142	#NUM!	IGHM,ITGAM,PIK3R1
COPI-mediated anterograde transport	1.03	0.0196	#NUM!	DYNC1H1,DYNLL1
ERK/MAPK Signaling	1.02	0.014	#NUM!	ITGAM,PIK3R1,PRKAG1
Inflammasome pathway	1.02	0.05	#NUM!	CTSB
Autophagy	1.02	0.0138	#NUM!	LAMP2,PIK3R1,PRKAG1
Mouse Embryonic Stem Cell Pluripotency	1.02	0.0192	#NUM!	ID2,PIK3R1
IGF-1 Signaling	1.01	0.019	#NUM!	PIK3R1,PRKAG1
Interleukin-7 signaling	0.998	0.0476	#NUM!	PIK3R1
Regulation of TLR by endogenous ligand	0.998	0.0476	#NUM!	S100A8
Paxillin Signaling	0.995	0.0187	#NUM!	ITGAM,PIK3R1
Multiple Sclerosis Signaling Pathway	0.994	0.0135	#NUM!	IRF4,NR1H3,PARP4
Signaling by VEGF	0.988	0.0185	#NUM!	CYBA,PIK3R1
Role of NFAT in Cardiac Hypertrophy	0.985	0.0134	#NUM!	CACNA1D,PIK3R1,PRKAG1
Chaperone Mediated Autophagy	0.979	0.0455	#NUM!	LAMP2
Nephrin family interactions	0.961	0.0435	#NUM!	PIK3R1
Formation of paraxial mesoderm	0.961	0.0435	#NUM!	MAML1
Pyrimidine Deoxyribonucleotides De Novo Biosynthesis I	0.961	0.0435	#NUM!	CMPK2
Apelin Cardiac Fibroblast Signaling Pathway	0.961	0.0435	#NUM!	PRKAG1
Mitochondrial Fatty Acid Beta-Oxidation	0.943	0.0417	#NUM!	PCCB
Regulation of RUNX1 Expression and Activity	0.943	0.0417	#NUM!	MOV10
Mitotic Metaphase and Anaphase	0.939	0.0128	#NUM!	DYNC1H1,DYNLL1,LMNB1
Superpathway of Inositol Phosphate Compounds	0.931	0.0127	#NUM!	INPP5A,INPP5K,PIK3R1
PAK Signaling	0.931	0.0171	#NUM!	ITGAM,PIK3R1
Signaling by NTRK2 (TRKB)	0.927	0.04	#NUM!	PIK3R1
Signaling by Erythropoietin	0.927	0.04	#NUM!	PIK3R1
Fc Epsilon RI Signaling	0.925	0.0169	#NUM!	INPP5K,PIK3R1
Regulation of lipid metabolism by PPARalpha	0.919	0.0168	#NUM!	MED30,NR1H3
MSP-RON Signaling in Macrophages Pathway	0.919	0.0168	#NUM!	ITGAM,PIK3R1
Sphingosine-1-phosphate Signaling	0.913	0.0167	#NUM!	CASP4,PIK3R1
Renin-Angiotensin Signaling	0.907	0.0165	#NUM!	PIK3R1,PRKAG1
Pyroptosis	0.895	0.037	#NUM!	CASP4
LXR/RXR Activation	0.895	0.0163	#NUM!	NR1H3,S100A8
RHOA Signaling	0.889	0.0161	#NUM!	ARHGAP9,CDC42EP3
Signaling by ALK	0.881	0.0357	#NUM!	PIK3R1
SUMOylation of intracellular receptors	0.881	0.0357	#NUM!	NR1H3
CDP-diacylglycerol Biosynthesis I	0.881	0.0357	#NUM!	CDS2
Energy dependent regulation of mTOR by LKB1-AMPK	0.866	0.0345	#NUM!	PRKAG1
G Beta Gamma Signaling	0.862	0.0155	#NUM!	CACNA1D,PRKAG1
Phosphatidylglycerol Biosynthesis II (Non-plastidic)	0.853	0.0333	#NUM!	CDS2
Role of p14/p19ARF in Tumor Suppression	0.853	0.0333	#NUM!	PIK3R1
Hematoma Resolution Signaling Pathway	0.851	0.0116	#NUM!	ANXA1,ITGAM,PRKAG1
Ferroptosis Signaling Pathway	0.851	0.0153	#NUM!	CTSB,PRKAG1
Response to elevated platelet cytosolic Ca2+	0.846	0.0152	#NUM!	LAMP2,PSAP
HGF Signaling	0.846	0.0152	#NUM!	ITGAM,PIK3R1
Neutrophil Extracellular Trap Signaling Pathway	0.845	0.01	2	CASP4,IGHM,ITGAM,PIK3R1
P2Y Purinergic Receptor Signaling Pathway	0.841	0.015	#NUM!	PIK3R1,PRKAG1
Cardiac Hypertrophy Signaling	0.841	0.0115	#NUM!	CACNA1D,PIK3R1,PRKAG1
Toll-like Receptor Cascades	0.84	0.0323	#NUM!	ITGAM
Sonic Hedgehog Signaling	0.84	0.0323	#NUM!	PRKAG1
Estrogen Receptor Signaling	0.821	0.00978	2	CACNA1D,MED30,PIK3R1,PRKAG1
DHCR24 Signaling Pathway	0.82	0.0146	#NUM!	NR1H3,PIK3R1
RAC Signaling	0.82	0.0146	#NUM!	ITGAM,PIK3R1
Signaling by Rho Family GTPases	0.82	0.0112	#NUM!	CDC42EP3,ITGAM,PIK3R1
White Adipose Tissue Browning Pathway	0.815	0.0145	#NUM!	CACNA1D,PRKAG1
RHO GTPases Activate Formins	0.81	0.0144	#NUM!	DYNC1H1,DYNLL1
Antimicrobial peptides	0.803	0.0294	#NUM!	S100A8
Signaling by NOTCH2	0.803	0.0294	#NUM!	MAML1
Oncogene Induced Senescence	0.803	0.0294	#NUM!	MOV10
Cargo concentration in the ER	0.803	0.0294	#NUM!	CTSZ
Hepatic Fibrosis Signaling Pathway	0.8	0.00959	#NUM!	CACNA1D,ITGAM,PIK3R1,PRKAG1
Insulin Secretion Signaling Pathway	0.793	0.0109	#NUM!	CACNA1D,PIK3R1,PRKAG1
GPVI-mediated activation cascade	0.791	0.0286	#NUM!	PIK3R1
Transcriptional Regulation by NPAS4	0.791	0.0286	#NUM!	MOV10
IL-9 Signaling	0.791	0.0286	#NUM!	PIK3R1
FLT3 Signaling	0.78	0.0278	#NUM!	PIK3R1
Eicosanoid Signaling	0.777	0.0107	#NUM!	LTB4R,PIK3R1,PRKAG1
Oxytocin Signaling Pathway	0.771	0.0106	#NUM!	CACNA1D,PIK3R1,PRKAG1
Detoxification of Reactive Oxygen Species	0.769	0.027	#NUM!	CYBA
Complement System	0.769	0.027	#NUM!	ITGAM
Dilated Cardiomyopathy Signaling Pathway	0.759	0.0133	#NUM!	CACNA1D,PRKAG1
PTEN Regulation	0.759	0.0133	#NUM!	MOV10,TRIM27
SUMOylation of ubiquitinylation proteins	0.758	0.0263	#NUM!	TRIM27
Notch Signaling	0.758	0.0263	#NUM!	MAML1
Corticotropin Releasing Hormone Signaling	0.75	0.0132	#NUM!	CACNA1D,PRKAG1
NGF-stimulated transcription	0.748	0.0256	#NUM!	ID2
Superpathway of Methionine Degradation	0.748	0.0256	#NUM!	PCCB
Signaling by FGFR3	0.738	0.025	#NUM!	PIK3R1
Transcriptional Regulation by VENTX	0.738	0.025	#NUM!	MOV10
Pyrimidine Ribonucleotides Interconversion	0.738	0.025	#NUM!	CMPK2
Relaxin Signaling	0.737	0.0129	#NUM!	PIK3R1,PRKAG1
eNOS Signaling	0.733	0.0128	#NUM!	PIK3R1,PRKAG1
Transport of vitamins, nucleosides, and related molecules	0.729	0.0244	#NUM!	SLC28A2
Signaling by FGFR4	0.729	0.0244	#NUM!	PIK3R1
RET signaling	0.729	0.0244	#NUM!	PIK3R1
Mechanisms of Viral Exit from Host Cells	0.729	0.0244	#NUM!	LMNB1
Ovarian Cancer Signaling	0.724	0.0127	#NUM!	PIK3R1,PRKAG1
Senescence Pathway	0.719	0.01	#NUM!	CACNA1D,PIK3R1,YPEL3
MyD88:MAL(TIRAP) cascade initiated on plasma membrane	0.719	0.0238	#NUM!	S100A8
Regulation of beta-cell development	0.719	0.0238	#NUM!	MAML1
Formation of WDR5-containing histone-modifying complexes	0.719	0.0238	#NUM!	RBBP5
Microautophagy Signaling Pathway	0.716	0.0125	#NUM!	LAMP2,PRKAG1
HEY1 Signaling Pathway	0.712	0.0124	#NUM!	PIK3R1,PRKAG1
Signaling by Insulin receptor	0.71	0.0233	#NUM!	PIK3R1
Signaling by SCF-KIT	0.71	0.0233	#NUM!	PIK3R1
Pyrimidine Ribonucleotides De Novo Biosynthesis	0.71	0.0233	#NUM!	CMPK2
PI3K Cascade	0.701	0.0227	#NUM!	PIK3R1
TP53 Regulates Transcription of Cell Death Genes	0.701	0.0227	#NUM!	BCL6
Coronavirus Replication Pathway	0.692	0.0222	#NUM!	Ifitm6
DNA damage-induced 14-3-3σ Signaling	0.684	0.0217	#NUM!	CASP4
IL-23 Signaling Pathway	0.684	0.0217	#NUM!	PIK3R1
Androgen Signaling	0.68	0.0118	#NUM!	CACNA1D,PRKAG1
Signaling by the B Cell Receptor (BCR)	0.677	0.0118	#NUM!	IGHM,PIK3R1
Ribonucleotide Reductase Signaling Pathway	0.673	0.0117	#NUM!	PARP4,PIK3R1
Class A/1 (Rhodopsin-like receptors)	0.67	0.00946	#NUM!	ANXA1,LTB4R,PSAP
nNOS Signaling in Skeletal Muscle Cells	0.668	0.0208	#NUM!	CACNA1D
Apelin Muscle Signaling Pathway	0.668	0.0208	#NUM!	PRKAG1
PFKFB4 Signaling Pathway	0.66	0.0204	#NUM!	PRKAG1
Signaling by ERBB2	0.652	0.02	#NUM!	PIK3R1
Signaling by EGFR	0.652	0.02	#NUM!	PIK3R1
Signaling by FGFR1	0.652	0.02	#NUM!	PIK3R1
Signaling by NOTCH3	0.652	0.02	#NUM!	MAML1
Melanoma Signaling	0.652	0.02	#NUM!	PIK3R1
MYC Mediated Apoptosis Signaling	0.652	0.02	#NUM!	PRKAG1
Cardiac β-adrenergic Signaling	0.64	0.0111	#NUM!	CACNA1D,PRKAG1
Apoptotic execution phase	0.637	0.0192	#NUM!	LMNB1
UVB-Induced MAPK Signaling	0.637	0.0192	#NUM!	PIK3R1
MicroRNA Biogenesis Signaling Pathway	0.616	0.0107	#NUM!	HNRNPA2B1,PIK3R1
FXR/RXR Activation	0.616	0.0107	#NUM!	NR1H3,PRKAG1
Intrinsic Pathway for Apoptosis	0.616	0.0182	#NUM!	DYNLL1
E3 ubiquitin ligases ubiquitinate target proteins	0.616	0.0182	#NUM!	RNF144A
Lymphotoxin β Receptor Signaling	0.616	0.0182	#NUM!	PIK3R1
NLR signaling pathways	0.609	0.0179	#NUM!	CASP4
DNA Damage/Telomere Stress Induced Senescence	0.609	0.0179	#NUM!	LMNB1
Triacylglycerol Biosynthesis	0.609	0.0179	#NUM!	DGAT2
EGF Signaling	0.609	0.0179	#NUM!	PIK3R1
Mitochondrial Dysfunction	0.602	0.00872	#NUM!	CACNA1D,PIK3R1,PRKAG1
Role of IL-17A in Arthritis	0.602	0.0175	#NUM!	PIK3R1
Regulation of the Epithelial Mesenchymal Transition by Growth Factors Pathway	0.6	0.0104	#NUM!	ID2,PIK3R1
Signaling by PDGF	0.596	0.0172	#NUM!	PIK3R1
Endothelin-1 Signaling	0.593	0.0103	#NUM!	CASP4,PIK3R1
Signaling by ERBB4	0.589	0.0169	#NUM!	PIK3R1
Metabolism of water-soluble vitamins and cofactors	0.589	0.0169	#NUM!	PCCB
Polyamine Regulation in Colon Cancer	0.589	0.0169	#NUM!	MXD1
Endometrial Cancer Signaling	0.583	0.0167	#NUM!	PIK3R1
Retinoic acid Mediated Apoptosis Signaling	0.583	0.0167	#NUM!	PARP4
SPINK1 Pancreatic Cancer Pathway	0.583	0.0167	#NUM!	CTSB
Mitotic G2-G2/M phases	0.578	0.0101	#NUM!	DYNC1H1,DYNLL1
Adrenomedullin signaling pathway	0.578	0.0101	#NUM!	PIK3R1,PRKAG1
Collagen degradation	0.577	0.0164	#NUM!	CTSB
Assembly of collagen fibrils and other multimeric structures	0.577	0.0164	#NUM!	CTSB
NCAM signaling for neurite out-growth	0.577	0.0164	#NUM!	CACNA1D
Primary Immunodeficiency Signaling	0.577	0.0164	#NUM!	IGHM
Cellular Effects of Sildenafil (Viagra)	0.577	0.00727	-0.447	ADGRG5,CACNA1D,LTB4R,PIK3R1,PRKAG1
UFMylation Signaling Pathway	0.571	0.0161	#NUM!	NR1H3
IL-2 Signaling	0.571	0.0161	#NUM!	PIK3R1
Intra-Golgi and retrograde Golgi-to-ER traffic	0.566	0.00985	#NUM!	DYNC1H1,DYNLL1
Transcriptional Regulation by MECP2	0.565	0.0159	#NUM!	MOV10
Thrombopoietin Signaling	0.565	0.0159	#NUM!	PIK3R1
Phagosome Formation	0.564	0.00718	2.236	ADGRG5,IGHM,ITGAM,LTB4R,PIK3R1
Cilium Assembly	0.563	0.0098	#NUM!	DYNC1H1,DYNLL1
Mitochondrial biogenesis	0.559	0.0156	#NUM!	PRKAG1
Fc epsilon receptor (FCERI) signaling	0.557	0.00971	#NUM!	PIK3R1,RASGRP4
G-Protein Coupled Receptor Signaling	0.554	0.00711	1.342	ADGRG5,LTB4R,PIK3R1,PRKAG1,RGS14
PXR/RXR Activation	0.553	0.0154	#NUM!	PRKAG1
Clathrin-mediated Endocytosis Signaling	0.551	0.00962	#NUM!	PIK3R1,S100A8
Cachexia Signaling Pathway	0.549	0.00815	#NUM!	CASP4,PIK3R1,PRKAG1
Role of PI3K/AKT Signaling in the Pathogenesis of Influenza	0.548	0.0152	#NUM!	PIK3R1
IL-8 Signaling	0.545	0.00952	#NUM!	ITGAM,PIK3R1
CD40 Signaling	0.542	0.0149	#NUM!	PIK3R1
IL-17A Signaling in Airway Cells	0.542	0.0149	#NUM!	PIK3R1
Integrin Signaling	0.54	0.00943	#NUM!	ITGAM,PIK3R1
Cardiac Hypertrophy Signaling (Enhanced)	0.537	0.00738	#NUM!	CACNA1D,ITGAM,PIK3R1,PRKAG1
Class I MHC mediated antigen processing and presentation	0.535	0.008	#NUM!	CYBA,FBXO31,S100A8
Sensory processing of sound by inner hair cells of the cochlea	0.532	0.0145	#NUM!	CACNA1D
Role of JAK1 and JAK3 in γc Cytokine Signaling	0.532	0.0145	#NUM!	PIK3R1
SPINK1 General Cancer Pathway	0.532	0.0145	#NUM!	PIK3R1
GM-CSF Signaling	0.526	0.0143	#NUM!	PIK3R1
Translocation of SLC2A4 (GLUT4) to the plasma membrane	0.521	0.0141	#NUM!	PRKAG1
Growth Hormone Signaling	0.521	0.0141	#NUM!	PIK3R1
RHOGDI Signaling	0.518	0.00909	#NUM!	ARHGAP9,ITGAM
Calcium Signaling	0.518	0.00909	#NUM!	CACNA1D,PRKAG1
COPII-mediated vesicle transport	0.516	0.0139	#NUM!	CTSZ
Signaling by FGFR2	0.511	0.0137	#NUM!	PIK3R1
Extra-nuclear estrogen signaling	0.511	0.0137	#NUM!	PIK3R1
Glioma Invasiveness Signaling	0.511	0.0137	#NUM!	PIK3R1
Hepatic Cholestasis	0.51	0.00897	#NUM!	NR1H3,PRKAG1
trans-Golgi Network Vesicle Budding	0.506	0.0135	#NUM!	CTSZ
Granzyme A Signaling	0.506	0.0135	#NUM!	LMNB1
Caveolar-mediated Endocytosis Signaling	0.502	0.0133	#NUM!	ITGAM
Plasma lipoprotein assembly, remodeling, and clearance	0.497	0.0132	#NUM!	NR1H3
Angiopoietin Signaling	0.497	0.0132	#NUM!	PIK3R1
Macropinocytosis Signaling	0.497	0.0132	#NUM!	PIK3R1
Antiproliferative Role of Somatostatin Receptor 2	0.492	0.013	#NUM!	PIK3R1
Signaling by NOTCH1	0.488	0.0128	#NUM!	MAML1
Costimulation by the CD28 family	0.488	0.0128	#NUM!	PIK3R1
VDR/RXR Activation	0.488	0.0128	#NUM!	MXD1
NF-κB Activation by Viruses	0.488	0.0128	#NUM!	PIK3R1
Signaling by MET	0.483	0.0127	#NUM!	PIK3R1
IL-3 Signaling	0.483	0.0127	#NUM!	PIK3R1
Maturity Onset Diabetes of Young (MODY) Signaling	0.483	0.0127	#NUM!	CACNA1D
Renal Cell Carcinoma Signaling	0.483	0.0127	#NUM!	PIK3R1
Thyroid Cancer Signaling	0.483	0.0127	#NUM!	PIK3R1
Glycosaminoglycan metabolism	0.479	0.0125	#NUM!	VCAN
Sertoli Cell-Germ Cell Junction Signaling Pathway (Enhanced)	0.478	0.00847	#NUM!	PIK3R1,PRKAG1
cAMP-mediated signaling	0.478	0.00847	#NUM!	LTB4R,RGS14
NRF2-mediated Oxidative Stress Response	0.475	0.00844	#NUM!	HACD3,PIK3R1
Activation of anterior HOX genes in hindbrain during early embryogenesis	0.474	0.0123	#NUM!	RBBP5
Glucocorticoid Receptor Signaling	0.474	0.00687	#NUM!	ANXA1,PIK3R1,PRKAG1,TSC22D3
FLT3 Signaling in Hematopoietic Progenitor Cells	0.47	0.0122	#NUM!	PIK3R1
Estrogen-Dependent Breast Cancer Signaling	0.47	0.0122	#NUM!	PIK3R1
JAK/STAT Signaling	0.47	0.0122	#NUM!	PIK3R1
Signaling by NOTCH4	0.466	0.012	#NUM!	MAML1
AMPK Signaling	0.464	0.00826	#NUM!	PIK3R1,PRKAG1
Transcriptional regulation of white adipocyte differentiation	0.461	0.0119	#NUM!	MED30
Activation of NMDA receptors and postsynaptic events	0.461	0.0119	#NUM!	PRKAG1
VEGF Family Ligand-Receptor Interactions	0.461	0.0119	#NUM!	PIK3R1
PEDF Signaling	0.461	0.0119	#NUM!	PIK3R1
Actin Cytoskeleton Signaling	0.459	0.0082	#NUM!	ITGAM,PIK3R1
Integrin cell surface interactions	0.457	0.0118	#NUM!	ITGAM
LPS-stimulated MAPK Signaling	0.457	0.0118	#NUM!	PIK3R1
Breast Cancer Regulation by Stathmin1	0.457	0.00673	1	ADGRG5,LTB4R,PIK3R1,PRKAG1
Neddylation	0.455	0.00813	#NUM!	FBXO31,RBBP5
Oxidative Stress Induced Senescence	0.453	0.0116	#NUM!	MOV10
FGF Signaling	0.453	0.0116	#NUM!	PIK3R1
Pancreatic Secretion Signaling Pathway	0.45	0.00806	#NUM!	PIK3R1,PRKAG1
Sphingolipid metabolism	0.449	0.0115	#NUM!	PSAP
Regulation of the Epithelial Mesenchymal Transition in Development Pathway	0.449	0.0115	#NUM!	MAML1
RAB GEFs exchange GTP for GDP on RABs	0.441	0.0112	#NUM!	GDI1
Generic Transcription Pathway	0.438	0.00701	#NUM!	MAML1,MED30,NR1H3
Immunogenic Cell Death Signaling Pathway	0.438	0.0111	#NUM!	ANXA1
Regulation of Cellular Mechanics by Calpain Protease	0.438	0.0111	#NUM!	ITGAM
RAR Activation	0.437	0.00699	#NUM!	KLF2,PIK3R1,PRKAG1
Ceramide Signaling	0.434	0.011	#NUM!	PIK3R1
Acute Myeloid Leukemia Signaling	0.434	0.011	#NUM!	PIK3R1
RANK Signaling in Osteoclasts	0.434	0.011	#NUM!	PIK3R1
BMP signaling pathway	0.434	0.011	#NUM!	PRKAG1
NER (Nucleotide Excision Repair, Enhanced Pathway)	0.434	0.011	#NUM!	UVSSA
Apelin Adipocyte Signaling Pathway	0.434	0.011	#NUM!	PRKAG1
Sperm Motility	0.431	0.00778	#NUM!	CLK1,PRKAG1
Regulation of TP53 Activity through Phosphorylation	0.426	0.0108	#NUM!	PRKAG1
Actin Nucleation by ARP-WASP Complex	0.426	0.0108	#NUM!	ITGAM
Fcγ Receptor-mediated Phagocytosis in Macrophages and Monocytes	0.423	0.0106	#NUM!	PIK3R1
Non-Small Cell Lung Cancer Signaling	0.423	0.0106	#NUM!	PIK3R1
RAF/MAP kinase cascade	0.42	0.00763	#NUM!	PIK3R1,RASGRP4
Prolactin Signaling	0.419	0.0105	#NUM!	PIK3R1
Transcriptional regulation by RUNX3	0.416	0.0104	#NUM!	MAML1
Small Cell Lung Cancer Signaling	0.416	0.0104	#NUM!	PIK3R1
IL-1 Signaling	0.416	0.0104	#NUM!	PRKAG1
Death Receptor Signaling	0.416	0.0104	#NUM!	PARP4
Nucleotide Excision Repair	0.412	0.0103	#NUM!	UVSSA
Salvage Pathways of Pyrimidine Ribonucleotides	0.412	0.0103	#NUM!	CMPK2
p53 Signaling	0.409	0.0102	#NUM!	PIK3R1
VEGF Signaling	0.405	0.0101	#NUM!	PIK3R1
Apelin Cardiomyocyte Signaling Pathway	0.405	0.0101	#NUM!	PIK3R1
B Cell Receptor Signaling	0.403	0.00631	#NUM!	BCL6,IGHM,INPP5K,PIK3R1
Colorectal Cancer Metastasis Signaling	0.402	0.00738	#NUM!	PIK3R1,PRKAG1
Cell Cycle Checkpoints	0.4	0.00735	#NUM!	DYNC1H1,DYNLL1
ABC-family proteins mediated transport	0.398	0.0099	#NUM!	ABCD2
Beta-catenin independent WNT signaling	0.395	0.0098	#NUM!	MOV10
Systemic Lupus Erythematosus in T Cell Signaling Pathway	0.392	0.00622	1	BCL6,CASP4,IRF4,PIK3R1
Integration of energy metabolism	0.392	0.00971	#NUM!	CACNA1D
Mitotic Prophase	0.392	0.00971	#NUM!	LMNB1
Chronic Myeloid Leukemia Signaling	0.389	0.00719	#NUM!	PIK3R1,PRKAG1
WNK Renal Signaling Pathway	0.382	0.00943	#NUM!	PIK3R1
Extracellular matrix organization	0.382	0.00943	#NUM!	VCAN
Post-translational protein phosphorylation	0.379	0.00935	#NUM!	VCAN
PPAR Signaling	0.379	0.00935	#NUM!	NR1H3
PD-1, PD-L1 cancer immunotherapy pathway	0.379	0.00935	#NUM!	PIK3R1
ISGylation Signaling Pathway	0.376	0.00926	#NUM!	IRF4
Telomerase Signaling	0.376	0.00926	#NUM!	PIK3R1
α-Adrenergic Signaling	0.373	0.00917	#NUM!	PRKAG1
Sleep REM Signaling Pathway	0.367	0.00901	#NUM!	PRKAG1
Molecular Mechanisms of Cancer	0.365	0.00584	2.236	ADGRG5,ITGAM,LTB4R,PIK3R1,PRKAG1
HDR through Homologous Recombination (HRR) or Single Strand Annealing (SSA)	0.364	0.00893	#NUM!	PPP4R2
Prostate Cancer Signaling	0.359	0.00877	#NUM!	PIK3R1
Sleep NREM Signaling Pathway	0.356	0.0087	#NUM!	PRKAG1
IL-13 Signaling Pathway	0.353	0.00862	#NUM!	PIK3R1
BBSome Signaling Pathway	0.35	0.00613	#NUM!	ADGRG5,LTB4R,PRKAG1
ESR-mediated signaling	0.348	0.00847	#NUM!	MOV10
Virus Entry via Endocytic Pathways	0.348	0.00847	#NUM!	PIK3R1
Neuroprotective Role of THOP1 in Alzheimer's Disease	0.337	0.0082	#NUM!	PRKAG1
Th1 Pathway	0.337	0.0082	#NUM!	PIK3R1
IL-15 Production	0.335	0.00813	#NUM!	CLK1
Regulation of Insulin-like Growth Factor (IGF) transport and uptake by IGFBPs	0.332	0.00806	#NUM!	VCAN
Glioma Signaling	0.33	0.008	#NUM!	PIK3R1
TCR signaling	0.327	0.00794	#NUM!	PIK3R1
Pancreatic Adenocarcinoma Signaling	0.327	0.00794	#NUM!	PIK3R1
Gαs Signaling	0.327	0.00794	#NUM!	PRKAG1
14-3-3-mediated Signaling	0.325	0.00787	#NUM!	PIK3R1
GP6 Signaling Pathway	0.325	0.00787	#NUM!	PIK3R1
IL-27 Signaling Pathway	0.322	0.00781	#NUM!	PIK3R1
TR/RXR Activation	0.322	0.00781	#NUM!	PIK3R1
IL-6 Signaling	0.32	0.00775	#NUM!	PIK3R1
fMLP Signaling in Neutrophils	0.315	0.00763	#NUM!	PIK3R1
Gap Junction Signaling	0.312	0.00615	#NUM!	PIK3R1,PRKAG1
Gα12/13 Signaling	0.31	0.00752	#NUM!	PIK3R1
Atherosclerosis Signaling	0.31	0.00752	#NUM!	S100A8
CCR3 Signaling in Eosinophils	0.308	0.00746	#NUM!	PIK3R1
Th2 Pathway	0.301	0.0073	#NUM!	PIK3R1
Role of Macrophages, Fibroblasts and Endothelial Cells in Rheumatoid Arthritis	0.301	0.00601	#NUM!	IGHM,PIK3R1
FcγRIIB Signaling in B Lymphocytes	0.3	0.00565	#NUM!	CACNA1D,IGHM,PIK3R1
Hereditary Breast Cancer Signaling	0.299	0.00725	#NUM!	PIK3R1
PIP3 activates AKT signaling	0.295	0.00714	#NUM!	PIK3R1
MSP-RON Signaling in Cancer Cells Pathway	0.295	0.00714	#NUM!	PIK3R1
Role of Chondrocytes in Rheumatoid Arthritis Signaling Pathway	0.293	0.00709	#NUM!	PRKAG1
IL-10 Signaling	0.267	0.00649	#NUM!	PRKAG1
T Cell Exhaustion Signaling Pathway	0.263	0.00529	#NUM!	BCL6,IRF4,PIK3R1
Role of Pattern Recognition Receptors in Recognition of Bacteria and Viruses	0.263	0.00641	#NUM!	PIK3R1
Fcgamma receptor (FCGR) dependent phagocytosis	0.261	0.00637	#NUM!	PIK3R1
Epithelial Adherens Junction Signaling	0.26	0.00633	#NUM!	PRKAG1
Inhibition of ARE-Mediated mRNA Degradation Pathway	0.251	0.00613	#NUM!	PRKAG1
HOTAIR Regulatory Pathway	0.251	0.00613	#NUM!	PIK3R1
HMGB1 Signaling	0.244	0.00599	#NUM!	PIK3R1
CXCR4 Signaling	0.242	0.00595	#NUM!	PIK3R1
Germ Cell-Sertoli Cell Junction Signaling	0.239	0.00588	#NUM!	PIK3R1
Gαq Signaling	0.239	0.00588	#NUM!	PIK3R1
Glioblastoma Multiforme Signaling	0.237	0.00585	#NUM!	PIK3R1
Aldosterone Signaling in Epithelial Cells	0.236	0.00581	#NUM!	PIK3R1
Th1 and Th2 Activation Pathway	0.236	0.00581	#NUM!	PIK3R1
Erythropoietin Signaling Pathway	0.23	0.00568	#NUM!	PIK3R1
Tumor Microenvironment Pathway	0.225	0.00559	#NUM!	PIK3R1
Tight Junction Signaling	0.224	0.00556	#NUM!	PRKAG1
Ion channel transport	0.219	0.00546	#NUM!	TSC22D3
Acute Phase Response Signaling	0.216	0.00541	#NUM!	PIK3R1
IL-17 Signaling	0.213	0.00535	#NUM!	PIK3R1
NOD1/2 Signaling Pathway	0.211	0.00529	#NUM!	TRIM27
Granulocyte Adhesion and Diapedesis	0.211	0.00529	#NUM!	ITGAM
PPARα/RXRα Activation	0.204	0.00515	#NUM!	PRKAG1
3-phosphoinositide Degradation	0.204	0.00515	#NUM!	INPP5K
Natural Killer Cell Signaling	0.199	0.00505	#NUM!	PIK3R1
Pulmonary Fibrosis Idiopathic Signaling Pathway	0	0.00307	#NUM!	PIK3R1
Pulmonary Healing Signaling Pathway	0	0.00503	#NUM!	PRKAG1
Role of Osteoclasts in Rheumatoid Arthritis Signaling Pathway	0	0.00325	#NUM!	PIK3R1
Chaperone Mediated Autophagy Signaling Pathway	0	0.00472	#NUM!	LAMP2,PIK3R1,PRKAG1
LPS/IL-1 Mediated Inhibition of RXR Function	0	0.00389	#NUM!	NR1H3
Immunoregulatory interactions between a Lymphoid and a non-Lymphoid cell	0	0.00495	#NUM!	SLAMF7
TCF dependent signaling in response to WNT	0	0.00503	#NUM!	RBBP5
Deubiquitination	0	0.0038	#NUM!	STAMBPL1
Processing of Capped Intron-Containing Pre-mRNA	0	0.00348	#NUM!	HNRNPA2B1
Role of NFAT in Regulation of the Immune Response	0	0.00193	#NUM!	IGHM,PIK3R1
CCR5 Signaling in Macrophages	0	0.002	#NUM!	CACNA1D
CTLA4 Signaling in Cytotoxic T Lymphocytes	0	0.00164	#NUM!	PIK3R1
T Helper Cell Differentiation	0	0.00212	#NUM!	BCL6
CD28 Signaling in T Helper Cells	0	0.00193	#NUM!	PIK3R1
IL-15 Signaling	0	0.0038	#NUM!	IGHM,PIK3R1
Dendritic Cell Maturation	0	0.00336	#NUM!	IGHM,PIK3R1
HIF1α Signaling	0	0.00478	#NUM!	PIK3R1
Thrombin Signaling	0	0.00444	#NUM!	PIK3R1
ICOS-ICOSL Signaling in T Helper Cells	0	0.00197	#NUM!	PIK3R1
Lipid Antigen Presentation by CD1	0	0.00241	#NUM!	PSAP
Allograft Rejection Signaling	0	0.00205	#NUM!	IGHM
Autoimmune Thyroid Disease Signaling	0	0.00218	#NUM!	IGHM
p70S6K Signaling	0	0.00345	#NUM!	IGHM,PIK3R1
Communication between Innate and Adaptive Immune Cells	0	0.00107	#NUM!	IGHM
Systemic Lupus Erythematosus Signaling	0	0.00281	#NUM!	HNRNPA2B1,IGHM,PIK3R1
CDC42 Signaling	0	0.00174	#NUM!	ITGAM
ILK Signaling	0	0.00498	#NUM!	PIK3R1
FAK Signaling	0	0.00387	2	ADGRG5,ITGAM,LTB4R,PIK3R1
Role of Osteoblasts, Osteoclasts and Chondrocytes in Rheumatoid Arthritis	0	0.00439	#NUM!	PIK3R1
Phospholipase C Signaling	0	0.00179	#NUM!	IGHM,ITGAM
HER-2 Signaling in Breast Cancer	0	0.00441	#NUM!	PIK3R1
Altered T Cell and B Cell Signaling in Rheumatoid Arthritis	0	0.00107	#NUM!	IGHM
Protein Kinase A Signaling	0	0.00243	#NUM!	PRKAG1
B Cell Development	0	0.00205	#NUM!	IGHM
Regulation of IL-2 Expression in Activated and Anergic T Lymphocytes	0	0.00216	#NUM!	TOB1
PKCθ Signaling in T Lymphocytes	0	0.00358	#NUM!	CACNA1D,PIK3R1
Antiproliferative Role of TOB in T Cell Signaling	0	0.00235	#NUM!	TOB1
PI3K Signaling in B Lymphocytes	0	0.0034	#NUM!	IGHM,PIK3R1
Role of Tissue Factor in Cancer	0	0.00483	#NUM!	PIK3R1
Sertoli Cell-Sertoli Cell Junction Signaling	0	0.00412	#NUM!	PIK3R1
Hematopoiesis from Pluripotent Stem Cells	0	0.00224	#NUM!	IGHM
3-phosphoinositide Biosynthesis	0	0.00478	#NUM!	PIK3R1
TEC Kinase Signaling	0	0.00346	#NUM!	ITGAM,PIK3R1
SAPK/JNK Signaling	0	0.00199	#NUM!	PIK3R1
IL-4 Signaling	0	0.00347	#NUM!	IRF4,PIK3R1
NF-κB Signaling	0	0.00175	#NUM!	PIK3R1
T Cell Receptor Signaling	0	0.00162	#NUM!	PIK3R1
Th17 Activation Pathway	0	0.00207	#NUM!	IRF4
Systemic Lupus Erythematosus in B Cell Signaling Pathway	0	0.00415	#NUM!	IGHM,INPP5K,PIK3R1

## Sheet: IPA_C1
Ingenuity Canonical Pathways	-log(p-value)	Ratio	z-score	Molecules
Ovarian Cancer Signaling	3.75	0.0316	#NUM!	APC,HDAC1,HDAC6,HDAC7,WNT3
TCF dependent signaling in response to WNT	3.29	0.0251	-2.236	APC,HDAC1,KLHL12,RNF146,WNT3
Adipogenesis pathway	2.93	0.0288	0	HDAC1,HDAC6,HDAC7,KLF5
Cell Cycle: G1/S Checkpoint Regulation	2.81	0.0435	#NUM!	HDAC1,HDAC6,HDAC7
Cardiac Hypertrophy Signaling (Enhanced)	2.68	0.0129	-0.816	HDAC1,HDAC6,HDAC7,ITGAV,PDE2A,SMPDL3B,WNT3
Signaling by NOTCH1	2.66	0.0385	#NUM!	HDAC1,HDAC6,HDAC7
Cyclins and Cell Cycle Regulation	2.54	0.0349	#NUM!	HDAC1,HDAC6,HDAC7
Non-Small Cell Lung Cancer Signaling	2.43	0.0319	#NUM!	HDAC1,HDAC6,HDAC7
Small Cell Lung Cancer Signaling	2.4	0.0312	#NUM!	HDAC1,HDAC6,HDAC7
Telomerase Signaling	2.26	0.0278	#NUM!	HDAC1,HDAC6,HDAC7
Prostate Cancer Signaling	2.2	0.0263	#NUM!	HDAC1,HDAC6,HDAC7
GDP-L-fucose Biosynthesis II (from L-fucose)	2.18	0.5	#NUM!	FPGT
Bladder Cancer Signaling	2.17	0.0259	#NUM!	HDAC1,HDAC6,HDAC7
Molecular Mechanisms of Cancer	2.14	0.00935	-1.414	ADGRE5,APC,CYSLTR2,GPR183,HDAC1,HDAC6,HDAC7,ITGAV
Glioma Signaling	2.09	0.024	#NUM!	HDAC1,HDAC6,HDAC7
Pancreatic Adenocarcinoma Signaling	2.08	0.0238	#NUM!	HDAC1,HDAC6,HDAC7
tRNA Splicing	2	0.0435	#NUM!	PDE2A,SMPDL3B
Spermine and Spermidine Degradation I	1.88	0.25	#NUM!	SAT1
PTEN Regulation	1.87	0.02	#NUM!	HDAC1,HDAC7,RNF146
Chronic Myeloid Leukemia Signaling	1.87	0.0144	-1	HDAC1,HDAC6,HDAC7,WNT3
E3 ubiquitin ligases ubiquitinate target proteins	1.85	0.0364	#NUM!	HLA-A,RNF144A
Polyamine Regulation in Colon Cancer	1.79	0.0339	#NUM!	APC,SAT1
Tyrosine Degradation I	1.79	0.2	#NUM!	FAH
WNT/β-catenin Signaling	1.7	0.0172	#NUM!	APC,HDAC1,WNT3
Cardiac β-adrenergic Signaling	1.66	0.0167	#NUM!	PDE2A,PPP1R14B,SMPDL3B
BBSome Signaling Pathway	1.64	0.0102	-1	ADGRE5,CBX7,CYSLTR2,GPR183,HDAC6
Basal Cell Carcinoma Signaling	1.63	0.0278	#NUM!	APC,WNT3
Caveolar-mediated Endocytosis Signaling	1.59	0.0267	#NUM!	HLA-A,ITGAV
Role of WNT/GSK-3β Signaling in the Pathogenesis of Influenza	1.56	0.0256	#NUM!	APC,WNT3
Human Embryonic Stem Cell Pluripotency	1.54	0.0149	#NUM!	APC,NFYB,WNT3
Coronavirus Pathogenesis Pathway	1.52	0.0147	#NUM!	HDAC1,HDAC6,HDAC7
ATF6 (ATF6-alpha) activates chaperone genes	1.49	0.1	#NUM!	NFYB
Regulation of the Epithelial Mesenchymal Transition in Development Pathway	1.47	0.023	#NUM!	APC,WNT3
Phenylalanine and tyrosine metabolism	1.45	0.0909	#NUM!	FAH
Calcium Signaling	1.44	0.0136	#NUM!	HDAC1,HDAC6,HDAC7
Degradation of beta-catenin by the destruction complex	1.43	0.0217	#NUM!	APC,HDAC1
Role of NFAT in Cardiac Hypertrophy	1.42	0.0134	#NUM!	HDAC1,HDAC6,HDAC7
Class B/2 (Secretin family receptors)	1.4	0.0208	#NUM!	ADGRE5,WNT3
Guanosine Nucleotides Degradation III	1.38	0.0769	#NUM!	NT5M
Urate Biosynthesis/Inosine 5'-phosphate Degradation	1.35	0.0714	#NUM!	NT5M
PD-1, PD-L1 cancer immunotherapy pathway	1.31	0.0187	#NUM!	HLA-A,LAT
FOXO-mediated transcription of cell death genes	1.29	0.0625	#NUM!	NFYB
Adenosine Nucleotides Degradation II	1.29	0.0625	#NUM!	NT5M
Oxidative Phosphorylation	1.28	0.0179	#NUM!	COX7B,UQCRC2
Generic Transcription Pathway	1.28	0.00935	-1	HDAC1,HDAC6,HDAC7,ZNF689
Signaling by ROBO receptors	1.25	0.0172	#NUM!	ROBO1,SRGAP3
Deubiquitination	1.25	0.0114	#NUM!	APC,RNF146,USP24
Purine Nucleotides Degradation II (Aerobic)	1.22	0.0526	#NUM!	NT5M
Protein Ubiquitination Pathway	1.21	0.011	#NUM!	HLA-A,USP24,USP29
Role of NANOG in Mammalian Embryonic Stem Cell Pluripotency	1.2	0.0161	#NUM!	APC,WNT3
L1CAM interactions	1.19	0.016	#NUM!	ITGAV,NRCAM
Electron transport, ATP synthesis, and heat production by uncoupling proteins	1.18	0.0156	#NUM!	COX7B,UQCRC2
Chaperone Mediated Autophagy	1.15	0.0455	#NUM!	HDAC6
Putrescine Degradation III	1.15	0.0455	#NUM!	SAT1
Sulfur amino acid metabolism	1.12	0.0417	#NUM!	ADO
Phagosome Formation	1.1	0.00718	-1.342	ADGRE5,CYSLTR2,GPR183,ITGAV,LAT
WNT ligand biogenesis and trafficking	1.08	0.0385	#NUM!	WNT3
G-Protein Coupled Receptor Signaling	1.08	0.00711	-0.447	ADGRE5,CYSLTR2,GPR183,PDE2A,SMPDL3B
G alpha (s) signalling events	1.08	0.0138	#NUM!	CYSLTR2,PDE2A
Effects of PIP2 hydrolysis	1.07	0.037	#NUM!	DGKQ
Syndecan interactions	1.07	0.037	#NUM!	ITGAV
ATF4 activates genes in response to endoplasmic reticulum stress	1.07	0.037	#NUM!	NFYB
NAD Salvage Pathway II	1.07	0.037	#NUM!	NT5M
Class A/1 (Rhodopsin-like receptors)	1.06	0.00946	#NUM!	CYSLTR2,GPR183,QRFP
Signaling by ALK	1.05	0.0357	#NUM!	HDAC1
Factors Promoting Cardiogenesis in Vertebrates	1.04	0.0131	#NUM!	APC,WNT3
TNFs bind their physiological receptors	1.04	0.0345	#NUM!	TNFRSF25
Relaxin Signaling	1.03	0.0129	#NUM!	PDE2A,SMPDL3B
Regulation of TP53 Activity through Acetylation	1.03	0.0333	#NUM!	HDAC1
Nucleotide catabolism	1.03	0.0333	#NUM!	NT5M
FOXO-mediated transcription of oxidative stress, metabolic and neuronal genes	1.03	0.0333	#NUM!	HDAC1
Asparagine N-linked glycosylation	1.01	0.0323	#NUM!	FPGT
HOTAIR Regulatory Pathway	0.996	0.0123	#NUM!	HDAC1,WNT3
Late endosomal microautophagy	0.974	0.0294	#NUM!	HDAC6
GPVI-mediated activation cascade	0.962	0.0286	#NUM!	LAT
Transcriptional Regulation by NPAS4	0.962	0.0286	#NUM!	GEM
Glioblastoma Multiforme Signaling	0.961	0.0117	#NUM!	APC,WNT3
G alpha (q) signalling events	0.949	0.0115	#NUM!	CYSLTR2,QRFP
ERCC6 (CSB) and EHMT2 (G9a) positively regulate rRNA expression	0.939	0.027	#NUM!	HDAC1
TWEAK Signaling	0.939	0.027	#NUM!	TNFRSF25
NoRC negatively regulates rRNA expression	0.928	0.0263	#NUM!	HDAC1
Antigen Presentation Pathway	0.918	0.0256	#NUM!	HLA-A
FAK Signaling	0.901	0.0058	-2.449	ADGRE5,APC,CYSLTR2,GPR183,ITGAV,SH3GL1
Activation of gene expression by SREBF (SREBP)	0.897	0.0244	#NUM!	NFYB
Mechanisms of Viral Exit from Host Cells	0.897	0.0244	#NUM!	SH3GL1
DAP12 interactions	0.887	0.0238	#NUM!	LAT
Aggrephagy	0.878	0.0233	#NUM!	HDAC6
Breast Cancer Regulation by Stathmin1	0.877	0.00673	-1	ADGRE5,CYSLTR2,GPR183,PPP1R14B
Elastic fibre formation	0.869	0.0227	#NUM!	ITGAV
TBC/RABGAPs	0.869	0.0227	#NUM!	OPTN
Regulation of the Epithelial-Mesenchymal Transition Pathway	0.868	0.0103	#NUM!	APC,WNT3
Natural Killer Cell Signaling	0.858	0.0101	#NUM!	HLA-A,LAT
Cytosolic sensors of pathogen-associated DNA	0.851	0.0217	#NUM!	LRRFIP1
DNA damage-induced 14-3-3σ Signaling	0.851	0.0217	#NUM!	HUS1
CDX Gastrointestinal Cancer Signaling Pathway	0.844	0.0099	#NUM!	KLF5,WNT3
Immunoregulatory interactions between a Lymphoid and a non-Lymphoid cell	0.844	0.0099	#NUM!	HLA-A,KLRG1
Transcriptional activity of SMAD2/SMAD3:SMAD4 heterotrimer	0.825	0.0204	#NUM!	HDAC1
Signaling by EGFR	0.817	0.02	#NUM!	SH3GL1
Netrin-1 signaling	0.817	0.02	#NUM!	ROBO1
RNA Polymerase I Transcription	0.817	0.02	#NUM!	HDAC1
Protein Kinase A Signaling	0.812	0.0073	#NUM!	PDE2A,PPP1R14B,SMPDL3B
Transcriptional regulation by RUNX2	0.809	0.0196	#NUM!	HDAC6
Transcriptional regulation of granulopoiesis	0.809	0.0196	#NUM!	KLF5
Apoptotic execution phase	0.802	0.0192	#NUM!	APC
ERK/MAPK Signaling	0.801	0.0093	#NUM!	ITGAV,PPP1R14B
Hepatic Fibrosis Signaling Pathway	0.799	0.00719	#NUM!	APC,ITGAV,WNT3
Signaling by TGF-beta Receptor Complex	0.794	0.0189	#NUM!	ITGAV
SUMOylation of chromatin organization proteins	0.772	0.0179	#NUM!	HDAC1
TNF signaling	0.765	0.0175	#NUM!	OPTN
Role of Osteoblasts, Osteoclasts and Chondrocytes in Rheumatoid Arthritis	0.761	0.00877	#NUM!	APC,WNT3
RUNX1 regulates megakaryocyte differentiation and platelet function	0.758	0.0172	#NUM!	HDAC1
Role of CHK Proteins in Cell Cycle Checkpoint Control	0.758	0.0172	#NUM!	HUS1
Metabolism of polyamines	0.752	0.0169	#NUM!	SAT1
PCP (Planar Cell Polarity) Pathway	0.745	0.0167	#NUM!	WNT3
SPINK1 Pancreatic Cancer Pathway	0.745	0.0167	#NUM!	CPM
cAMP-mediated signaling	0.738	0.00847	#NUM!	PDE2A,SMPDL3B
Cytoprotection by HMOX1	0.732	0.0161	#NUM!	COX7B
Transcriptional Regulation by MECP2	0.726	0.0159	#NUM!	HDAC1
Cellular Effects of Sildenafil (Viagra)	0.717	0.00581	2	ADGRE5,CYSLTR2,GPR183,PPP1R14B
Role of Osteoblasts in Rheumatoid Arthritis Signaling Pathway	0.716	0.0082	#NUM!	APC,WNT3
Actin Cytoskeleton Signaling	0.716	0.0082	#NUM!	APC,ITGAV
Remodeling of Epithelial Adherens Junctions	0.696	0.0147	#NUM!	APC
Interferon alpha/beta signaling	0.679	0.0141	#NUM!	HLA-A
Glioma Invasiveness Signaling	0.669	0.0137	#NUM!	ITGAV
SUMOylation of DNA damage response and repair proteins	0.653	0.0132	#NUM!	HDAC7
Colorectal Cancer Metastasis Signaling	0.648	0.00738	#NUM!	APC,WNT3
NF-κB Activation by Viruses	0.643	0.0128	#NUM!	ITGAV
Signaling by MET	0.638	0.0127	#NUM!	SH3GL1
NUR77 Signaling in T Lymphocytes	0.621	0.00585	#NUM!	HDAC1,HDAC7,HLA-A
Transcriptional regulation of white adipocyte differentiation	0.615	0.0119	#NUM!	KLF5
Processing of Capped Intron-Containing Pre-mRNA	0.612	0.00697	#NUM!	PPIG,SNRNP25
Integrin cell surface interactions	0.611	0.0118	#NUM!	ITGAV
Platelet homeostasis	0.606	0.0116	#NUM!	PDE2A
HIPPO signaling	0.602	0.0115	#NUM!	PPP1R14B
S100 Family Signaling Pathway	0.602	0.00518	-2	ADGRE5,CYSLTR2,GPR183,WNT3
TP53 Regulates Metabolic Genes	0.598	0.0114	#NUM!	COX7B
Histone Modification Signaling Pathway	0.595	0.00678	#NUM!	CBX7,HDAC1
RAB GEFs exchange GTP for GDP on RABs	0.593	0.0112	#NUM!	RIC1
Regulation of Cellular Mechanics by Calpain Protease	0.589	0.0111	#NUM!	ITGAV
Factors involved in megakaryocyte development and platelet production	0.585	0.011	#NUM!	HDAC1
Crosstalk between Dendritic Cells and Natural Killer Cells	0.585	0.011	#NUM!	HLA-A
Regulation of TP53 Activity through Phosphorylation	0.577	0.0108	#NUM!	HUS1
Actin Nucleation by ARP-WASP Complex	0.577	0.0108	#NUM!	ITGAV
Interferon gamma signaling	0.573	0.0106	#NUM!	HLA-A
Mitochondrial translation	0.565	0.0104	#NUM!	MRPS9
Death Receptor Signaling	0.565	0.0104	#NUM!	TNFRSF25
TGF-β Signaling	0.561	0.0103	#NUM!	HDAC1
p53 Signaling	0.558	0.0102	#NUM!	HDAC1
DNA Methylation and Transcriptional Repression Signaling	0.558	0.0102	#NUM!	HDAC1
p75 NTR receptor-mediated signalling	0.55	0.01	#NUM!	HDAC1
Sumoylation Pathway	0.539	0.00971	#NUM!	HDAC1
Mouse Embryonic Stem Cell Pluripotency	0.536	0.00962	#NUM!	APC
Pulmonary Fibrosis Idiopathic Signaling Pathway	0.535	0.00613	#NUM!	ITGAV,WNT3
CDC42 Signaling	0.529	0.00521	#NUM!	APC,HLA-A,ITGAV
Extracellular matrix organization	0.529	0.00943	#NUM!	ITGAV
Cargo recognition for clathrin-mediated endocytosis	0.526	0.00935	#NUM!	SH3GL1
Paxillin Signaling	0.526	0.00935	#NUM!	ITGAV
Role of Macrophages, Fibroblasts and Endothelial Cells in Rheumatoid Arthritis	0.522	0.00601	#NUM!	APC,WNT3
ISGylation Signaling Pathway	0.522	0.00926	#NUM!	HDAC6
Signaling by VEGF	0.522	0.00926	#NUM!	ITGAV
Kinetochore Metaphase Signaling Pathway	0.516	0.00909	#NUM!	PPP1R14B
Phospholipase C Signaling	0.509	0.00446	0	HDAC1,HDAC6,HDAC7,ITGAV,LAT
HDR through Homologous Recombination (HRR) or Single Strand Annealing (SSA)	0.509	0.00893	#NUM!	HUS1
Mitochondrial Dysfunction	0.503	0.00581	#NUM!	COX7B,UQCRC2
SRP-dependent cotranslational protein targeting to membrane	0.5	0.0087	#NUM!	SEC61A2
PAK Signaling	0.493	0.00855	#NUM!	ITGAV
Fc Epsilon RI Signaling	0.49	0.00847	#NUM!	LAT
ESR-mediated signaling	0.49	0.00847	#NUM!	HDAC1
Virus Entry via Endocytic Pathways	0.49	0.00847	#NUM!	HLA-A
Regulation of lipid metabolism by PPARalpha	0.487	0.0084	#NUM!	NFYB
Nitric Oxide Signaling in the Cardiovascular System	0.484	0.00833	#NUM!	PDE2A
Neuroprotective Role of THOP1 in Alzheimer's Disease	0.479	0.0082	#NUM!	HLA-A
Th1 Pathway	0.479	0.0082	#NUM!	HLA-A
TCR signaling	0.467	0.00794	#NUM!	LAT
14-3-3-mediated Signaling	0.464	0.00787	#NUM!	SRPK2
GP6 Signaling Pathway	0.464	0.00787	#NUM!	LAT
IL-27 Signaling Pathway	0.462	0.00781	#NUM!	HLA-A
Clathrin-mediated endocytosis	0.456	0.00769	#NUM!	SH3GL1
Class I MHC mediated antigen processing and presentation	0.455	0.00533	#NUM!	HERC6,HLA-A
Mitotic G1 phase and G1/S transition	0.454	0.00763	#NUM!	HDAC1
Ferroptosis Signaling Pathway	0.454	0.00763	#NUM!	SAT1
HGF Signaling	0.451	0.00758	#NUM!	ITGAV
DHCR24 Signaling Pathway	0.438	0.0073	#NUM!	KLF5
RAC Signaling	0.438	0.0073	#NUM!	ITGAV
Th2 Pathway	0.438	0.0073	#NUM!	HLA-A
Insulin Receptor Signaling	0.431	0.00714	#NUM!	PPP1R14B
Dilated Cardiomyopathy Signaling Pathway	0.407	0.00667	#NUM!	PDE2A
PTEN Signaling	0.405	0.00662	#NUM!	ITGAV
IL-10 Signaling	0.398	0.00649	#NUM!	HLA-A
HEY1 Signaling Pathway	0.384	0.00621	#NUM!	HDAC1
RAR Activation	0.382	0.00466	#NUM!	PDE2A,SMPDL3B
Transcriptional Regulatory Network in Embryonic Stem Cells	0.378	0.0061	#NUM!	WNT3
Phagosome Maturation	0.378	0.0061	#NUM!	HLA-A
Ribonucleotide Reductase Signaling Pathway	0.364	0.00585	#NUM!	NFYB
Th1 and Th2 Activation Pathway	0.362	0.00581	#NUM!	HLA-A
Tumor Microenvironment Pathway	0.349	0.00559	#NUM!	HLA-A
Calcium-induced T Lymphocyte Apoptosis	0.347	0.00435	#NUM!	HDAC1,HLA-A
D-myo-inositol (1,4,5,6)-Tetrakisphosphate Biosynthesis	0.342	0.00546	#NUM!	PPP1R14B
D-myo-inositol (3,4,5,6)-tetrakisphosphate Biosynthesis	0.342	0.00546	#NUM!	PPP1R14B
Regulation of eIF4 and p70S6K Signaling	0.341	0.00543	#NUM!	ITGAV
Macrophage Classical Activation Signaling Pathway	0.332	0.00529	#NUM!	UQCRC2
Neutrophil degranulation	0.331	0.0042	#NUM!	ADGRE5,ITGAV
Production of Nitric Oxide and Reactive Oxygen Species in Macrophages	0.329	0.00524	#NUM!	PPP1R14B
3-phosphoinositide Degradation	0.324	0.00515	#NUM!	PPP1R14B
Xenobiotic Metabolism PXR Signaling Pathway	0.322	0.00513	#NUM!	PPP1R14B
Pulmonary Healing Signaling Pathway	0.316	0.00503	#NUM!	WNT3
Mitotic G2-G2/M phases	0.316	0.00503	#NUM!	OPTN
D-myo-inositol-5-phosphate Metabolism	0.316	0.00503	#NUM!	PPP1R14B
PI3K/AKT Signaling	0.315	0.005	#NUM!	ITGAV
ILK Signaling	0.313	0.00498	#NUM!	PPP1R14B
Intra-Golgi and retrograde Golgi-to-ER traffic	0.31	0.00493	#NUM!	RIC1
Cilium Assembly	0.308	0.0049	#NUM!	HDAC6
Fc epsilon receptor (FCERI) signaling	0.305	0.00485	#NUM!	LAT
Role of Tissue Factor in Cancer	0.304	0.00483	#NUM!	ITGAV
Clathrin-mediated Endocytosis Signaling	0.303	0.00481	#NUM!	SH3GL1
HIF1α Signaling	0.301	0.00478	#NUM!	SAT1
3-phosphoinositide Biosynthesis	0.301	0.00478	#NUM!	PPP1R14B
ICOS-ICOSL Signaling in T Helper Cells	0.301	0.00394	#NUM!	HLA-A,LAT
IL-8 Signaling	0.3	0.00476	#NUM!	ITGAV
Cell surface interactions at the vascular wall	0.298	0.00474	#NUM!	ITGAV
Integrin Signaling	0.297	0.00472	#NUM!	ITGAV
CD28 Signaling in T Helper Cells	0.292	0.00387	#NUM!	HLA-A,LAT
Autophagy	0.29	0.00461	#NUM!	OPTN
Nuclear Cytoskeleton Signaling Pathway	0.286	0.00455	#NUM!	ITGAV
RHOGDI Signaling	0.286	0.00455	#NUM!	ITGAV
Multiple Sclerosis Signaling Pathway	0.283	0.0045	#NUM!	HLA-A
HER-2 Signaling in Breast Cancer	0.277	0.00441	#NUM!	COX7B
Osteoarthritis Pathway	0.265	0.00424	#NUM!	ITGAV
Superpathway of Inositol Phosphate Compounds	0.264	0.00422	#NUM!	PPP1R14B
PKCθ Signaling in T Lymphocytes	0.258	0.00358	#NUM!	HLA-A,LAT
Neddylation	0.253	0.00407	#NUM!	COMMD10
Pancreatic Secretion Signaling Pathway	0.251	0.00403	#NUM!	PPP1R14B
TEC Kinase Signaling	0.243	0.00346	#NUM!	ITGAV,TNFRSF25
Sperm Motility	0.241	0.00389	#NUM!	PDE2A
Glucocorticoid Receptor Signaling	0.24	0.00344	#NUM!	HLA-A,UQCRC2
G alpha (i) signalling events	0.24	0.00388	#NUM!	GPR183
RAF/MAP kinase cascade	0.236	0.00382	#NUM!	LAT
Signaling by Rho Family GTPases	0.231	0.00375	#NUM!	ITGAV
Cell Cycle Checkpoints	0.226	0.00368	#NUM!	HUS1
Insulin Secretion Signaling Pathway	0.223	0.00364	#NUM!	SEC61A2
Eicosanoid Signaling	0.218	0.00357	#NUM!	CYSLTR2
Sirtuin Signaling Pathway	0.208	0.00344	#NUM!	UQCRC2
Senescence Pathway	0.201	0.00334	#NUM!	CBX7
Neutrophil Extracellular Trap Signaling Pathway	0	0.0025	#NUM!	UQCRC2
Chaperone Mediated Autophagy Signaling Pathway	0	0.00157	#NUM!	HDAC6
RHO GTPase cycle	0	0.00222	#NUM!	SRGAP3
Role of NFAT in Regulation of the Immune Response	0	0.00193	#NUM!	HLA-A,LAT
Cytotoxic T Lymphocyte-mediated Apoptosis of Target Cells	0	0.00235	#NUM!	HLA-A
CTLA4 Signaling in Cytotoxic T Lymphocytes	0	0.00329	#NUM!	HLA-A,LAT
T Helper Cell Differentiation	0	0.00212	#NUM!	HLA-A
Dendritic Cell Maturation	0	0.00168	#NUM!	HLA-A
Type I Diabetes Mellitus Signaling	0	0.00196	#NUM!	HLA-A
Allograft Rejection Signaling	0	0.00205	#NUM!	HLA-A
Autoimmune Thyroid Disease Signaling	0	0.00218	#NUM!	HLA-A
Graft-versus-Host Disease Signaling	0	0.00224	#NUM!	HLA-A
G Protein Signaling Mediated by Tubby	0	0.00214	#NUM!	LAT
Communication between Innate and Adaptive Immune Cells	0	0.00107	#NUM!	HLA-A
Systemic Lupus Erythematosus Signaling	0	0.00281	#NUM!	HLA-A,LAT,SNRNP25
Altered T Cell and B Cell Signaling in Rheumatoid Arthritis	0	0.00107	#NUM!	HLA-A
B Cell Development	0	0.00205	#NUM!	HLA-A
Regulation of IL-2 Expression in Activated and Anergic T Lymphocytes	0	0.00216	#NUM!	LAT
OX40 Signaling Pathway	0	0.00209	#NUM!	HLA-A
Estrogen Receptor Signaling	0	0.00244	#NUM!	UQCRC2
NF-κB Signaling	0	0.00175	#NUM!	HDAC1
T Cell Receptor Signaling	0	0.00325	#NUM!	HLA-A,LAT
T Cell Exhaustion Signaling Pathway	0	0.00176	#NUM!	HLA-A
Systemic Lupus Erythematosus in T Cell Signaling Pathway	0	0.00311	#NUM!	HLA-A,LAT

## Sheet: IPA_C2
Ingenuity Canonical Pathways	-log(p-value)	Ratio	z-score	Molecules
Signaling by the B Cell Receptor (BCR)	3.94	0.0235	-2	GRB2,IGHM,IGKC,PRKCB
Macrophage Alternative Activation Signaling Pathway	3.75	0.0211	-2	GRB2,HLA-DRB5,IGHM,IGKC
Systemic Lupus Erythematosus in B Cell Signaling Pathway	3.21	0.0083	-1	GRB2,IGHM,IGKC,Iglc2,PRKCB,TRAF3
Fatty acyl-CoA biosynthesis	3.13	0.0741	#NUM!	MORC2,SCD
Glutamate binding, activation of AMPA receptors and synaptic plasticity	2.99	0.0625	#NUM!	Ap2b1,PRKCB
Role of Macrophages, Fibroblasts and Endothelial Cells in Rheumatoid Arthritis	2.84	0.012	-2	IGHM,IGKC,PRKCB,TRAF3
p70S6K Signaling	2.81	0.00864	#NUM!	GRB2,IGHM,IGKC,Iglc2,PRKCB
B Cell Receptor Signaling	2.64	0.00789	#NUM!	GRB2,IGHM,IGKC,Iglc2,PRKCB
Regulation of eIF4 and p70S6K Signaling	2.59	0.0163	#NUM!	GRB2,PABPC1,RPS19
Deadenylation-dependent mRNA decay	2.52	0.0364	#NUM!	PABPC1,TUT4
Phagosome Formation	2.46	0.00718	-2	GPR137B,GRB2,IGHM,IGKC,PRKCB
Primary Immunodeficiency Signaling	2.43	0.0328	#NUM!	IGHM,IGKC
Cell surface interactions at the vascular wall	2.43	0.0142	#NUM!	GRB2,IGHM,IGKC
Thrombopoietin Signaling	2.4	0.0317	#NUM!	GRB2,PRKCB
IL-12 Signaling and Production in Macrophages	2.33	0.0132	#NUM!	IGHM,IGKC,PRKCB
EIF2 Signaling	2.32	0.013	#NUM!	GRB2,PABPC1,RPS19
GM-CSF Signaling	2.31	0.0286	#NUM!	GRB2,PRKCB
S100 Family Signaling Pathway	2.27	0.00648	-2.236	GPR137B,IGHM,IGKC,PRKCB,TRAF3
B Cell Development	2.24	0.0082	#NUM!	HLA-DRB5,IGHM,IGKC,Iglc2
Methylmalonyl Pathway	2.23	0.25	#NUM!	PCCB
Costimulation by the CD28 family	2.22	0.0256	#NUM!	GRB2,HLA-DRB5
IL-7 Signaling Pathway	2.22	0.0256	#NUM!	GRB2,IGHM
IL-3 Signaling	2.21	0.0253	#NUM!	GRB2,PRKCB
VEGF Family Ligand-Receptor Interactions	2.16	0.0238	#NUM!	GRB2,PRKCB
PDGF Signaling	2.13	0.023	#NUM!	GRB2,PRKCB
2-oxobutanoate Degradation I	2.13	0.2	#NUM!	PCCB
FcγRIIB Signaling in B Lymphocytes	2.12	0.00753	#NUM!	GRB2,IGHM,IGKC,Iglc2
Prolactin Signaling	2.06	0.0211	#NUM!	GRB2,PRKCB
VEGF Signaling	2.02	0.0202	#NUM!	GRB2,PRKCB
STAT5 Activation	1.99	0.143	#NUM!	GRB2
PI3K Signaling in B Lymphocytes	1.96	0.00679	#NUM!	IGHM,IGKC,Iglc2,PRKCB
Cargo recognition for clathrin-mediated endocytosis	1.96	0.0187	#NUM!	Ap2b1,GRB2
Altered T Cell and B Cell Signaling in Rheumatoid Arthritis	1.92	0.00533	#NUM!	HLA-DRB5,IGHM,IGKC,Iglc2,TRAF3
Nonsense-Mediated Decay (NMD)	1.88	0.0171	#NUM!	PABPC1,RPS19
Fc Epsilon RI Signaling	1.88	0.0169	#NUM!	GRB2,PRKCB
Virus Entry via Endocytic Pathways	1.88	0.0169	#NUM!	Ap2b1,PRKCB
MSP-RON Signaling in Macrophages Pathway	1.87	0.0168	#NUM!	GRB2,HLA-DRB5
Renin-Angiotensin Signaling	1.86	0.0165	#NUM!	GRB2,PRKCB
Eukaryotic Translation Initiation	1.85	0.0164	#NUM!	PABPC1,RPS19
Th1 Pathway	1.85	0.0164	#NUM!	GRB2,HLA-DRB5
Glioma Signaling	1.83	0.016	#NUM!	GRB2,PRKCB
14-3-3-mediated Signaling	1.82	0.0157	#NUM!	GRB2,PRKCB
GP6 Signaling Pathway	1.82	0.0157	#NUM!	GRB2,PRKCB
G Beta Gamma Signaling	1.8	0.0155	#NUM!	GRB2,PRKCB
Clathrin-mediated endocytosis	1.8	0.0154	#NUM!	Ap2b1,GRB2
Oleate Biosynthesis II (Animals)	1.79	0.0909	#NUM!	SCD
HGF Signaling	1.79	0.0152	#NUM!	GRB2,PRKCB
Role of NFAT in Regulation of the Immune Response	1.76	0.00484	#NUM!	GRB2,HLA-DRB5,IGHM,IGKC,Iglc2
Th2 Pathway	1.76	0.0146	#NUM!	GRB2,HLA-DRB5
Assembly of RNA Polymerase I Complex	1.72	0.0769	#NUM!	POLR1D
Interleukin-15 signaling	1.69	0.0714	#NUM!	GRB2
Neutrophil Extracellular Trap Signaling Pathway	1.67	0.0075	#NUM!	IGHM,IGKC,PRKCB
Transcriptional regulation by RUNX1	1.67	0.0132	#NUM!	KMT2A,PRKCB
Mitotic Telophase/Cytokinesis	1.66	0.0667	#NUM!	STAG1
Fcgamma receptor (FCGR) dependent phagocytosis	1.64	0.0127	#NUM!	GRB2,IGKC
Signal regulatory protein family interactions	1.63	0.0625	#NUM!	GRB2
Phospholipase C Signaling	1.62	0.00446	#NUM!	GRB2,IGHM,IGKC,Iglc2,PRKCB
HOTAIR Regulatory Pathway	1.61	0.0123	#NUM!	JARID2,KMT2A
Signaling by Type 1 Insulin-like Growth Factor 1 Receptor (IGF1R)	1.6	0.0588	#NUM!	GRB2
Signaling by NTRK3 (TRKC)	1.6	0.0588	#NUM!	GRB2
Gastrin-CREB signalling pathway via PKC and MAPK	1.58	0.0556	#NUM!	GRB2
Th1 and Th2 Activation Pathway	1.57	0.0116	#NUM!	GRB2,HLA-DRB5
Erythropoietin Signaling Pathway	1.55	0.0114	#NUM!	GRB2,PRKCB
Signaling by Hippo	1.53	0.05	#NUM!	MOB1A
Autoimmune Thyroid Disease Signaling	1.52	0.00654	#NUM!	HLA-DRB5,IGHM,IGKC
Macrophage Classical Activation Signaling Pathway	1.5	0.0106	#NUM!	HLA-DRB5,JARID2
RHO GTPases Activate NADPH Oxidases	1.49	0.0455	#NUM!	PRKCB
PPARα/RXRα Activation	1.47	0.0103	#NUM!	GRB2,PRKCB
Endothelin-1 Signaling	1.47	0.0103	#NUM!	GRB2,PRKCB
Mitochondrial Fatty Acid Beta-Oxidation	1.46	0.0417	#NUM!	PCCB
Pulmonary Healing Signaling Pathway	1.45	0.0101	#NUM!	GRB2,PRKCB
Allograft Rejection Signaling	1.45	0.00615	#NUM!	HLA-DRB5,IGHM,IGKC
Human Embryonic Stem Cell Pluripotency	1.45	0.00995	#NUM!	GRB2,PRKCB
Insulin processing	1.44	0.04	#NUM!	ERO1B
Signaling by NTRK2 (TRKB)	1.44	0.04	#NUM!	GRB2
Signaling by Erythropoietin	1.44	0.04	#NUM!	GRB2
Coronavirus Pathogenesis Pathway	1.43	0.0098	#NUM!	RPS19,TRAF3
Fc epsilon receptor (FCERI) signaling	1.43	0.00971	#NUM!	GRB2,IGKC
WNT ligand biogenesis and trafficking	1.42	0.0385	#NUM!	TMED5
Clathrin-mediated Endocytosis Signaling	1.42	0.00962	#NUM!	Ap2b1,GRB2
Activin Inhibin Signaling Pathway	1.41	0.00948	#NUM!	IGHM,IGKC
Integrin signaling	1.41	0.037	#NUM!	GRB2
mTOR Signaling	1.4	0.00935	#NUM!	PRKCB,RPS19
ERK/MAPK Signaling	1.39	0.0093	#NUM!	GRB2,PRKCB
IL-15 Signaling	1.37	0.0057	#NUM!	IGHM,IGKC,Iglc2
Multiple Sclerosis Signaling Pathway	1.37	0.00901	#NUM!	HLA-DRB5,JARID2
Role of NFAT in Cardiac Hypertrophy	1.36	0.00893	#NUM!	GRB2,PRKCB
Signaling by CSF3 (G-CSF)	1.36	0.0333	#NUM!	GRB2
Thrombin Signaling	1.36	0.00889	#NUM!	GRB2,PRKCB
HER-2 Signaling in Breast Cancer	1.35	0.00881	#NUM!	GRB2,PRKCB
Signaling by CSF1 (M-CSF) in myeloid cells	1.35	0.0323	#NUM!	GRB2
Toll Like Receptor 3 (TLR3) Cascade	1.33	0.0312	#NUM!	TRAF3
Communication between Innate and Adaptive Immune Cells	1.32	0.00429	-2	HLA-DRB5,IGHM,IGKC,Iglc2
PRC2 methylates histones and DNA	1.3	0.0286	#NUM!	JARID2
RHO GTPases Activate WASPs and WAVEs	1.28	0.0278	#NUM!	GRB2
FLT3 Signaling	1.28	0.0278	#NUM!	GRB2
MyD88-independent TLR4 cascade	1.27	0.027	#NUM!	TRAF3
TWEAK Signaling	1.27	0.027	#NUM!	TRAF3
Superpathway of Methionine Degradation	1.25	0.0256	#NUM!	PCCB
Antigen Presentation Pathway	1.25	0.0256	#NUM!	HLA-DRB5
Breast Cancer Regulation by Stathmin1	1.24	0.00505	#NUM!	GPR137B,GRB2,PRKCB
Signaling by FGFR3	1.24	0.025	#NUM!	GRB2
Dendritic Cell Maturation	1.24	0.00503	#NUM!	HLA-DRB5,IGHM,IGKC
Activation of gene expression by SREBF (SREBP)	1.23	0.0244	#NUM!	SCD
Signaling by FGFR4	1.23	0.0244	#NUM!	GRB2
RNA Polymerase III Transcription	1.23	0.0244	#NUM!	POLR1D
RET signaling	1.23	0.0244	#NUM!	GRB2
Mechanisms of Viral Exit from Host Cells	1.23	0.0244	#NUM!	PRKCB
DAP12 interactions	1.22	0.0238	#NUM!	GRB2
Formation of WDR5-containing histone-modifying complexes	1.22	0.0238	#NUM!	KMT2A
April Mediated Signaling	1.22	0.0238	#NUM!	TRAF3
CTLA4 Signaling in Cytotoxic T Lymphocytes	1.22	0.00493	#NUM!	Ap2b1,GRB2,HLA-DRB5
Signaling by Insulin receptor	1.21	0.0233	#NUM!	GRB2
Signaling by SCF-KIT	1.21	0.0233	#NUM!	GRB2
B Cell Activating Factor Signaling	1.21	0.0233	#NUM!	TRAF3
Oncostatin M Signaling	1.21	0.0233	#NUM!	GRB2
Insulin Secretion Signaling Pathway	1.2	0.00727	#NUM!	PABPC1,PRKCB
PI3K Cascade	1.2	0.0227	#NUM!	GRB2
Regulation of mRNA stability by proteins that bind AU-rich elements	1.2	0.0227	#NUM!	PABPC1
Oxytocin Signaling Pathway	1.18	0.00709	#NUM!	GRB2,PRKCB
Interleukin-2 family signaling	1.18	0.0217	#NUM!	GRB2
Role of RIG1-like Receptors in Antiviral Innate Immunity	1.18	0.0217	#NUM!	TRAF3
Role of OCT4 in Mammalian Embryonic Stem Cell Pluripotency	1.18	0.0217	#NUM!	JARID2
G alpha (z) signalling events	1.16	0.0208	#NUM!	PRKCB
Histone Modification Signaling Pathway	1.15	0.00678	#NUM!	KMT2A,PRKCB
Signaling by ERBB2	1.15	0.02	#NUM!	GRB2
Signaling by EGFR	1.15	0.02	#NUM!	GRB2
Signaling by FGFR1	1.15	0.02	#NUM!	GRB2
RNA Polymerase I Transcription	1.15	0.02	#NUM!	POLR1D
NR1H2 and NR1H3-mediated signaling	1.15	0.02	#NUM!	SCD
Systemic Lupus Erythematosus Signaling	1.14	0.00375	#NUM!	GRB2,IGHM,IGKC,Iglc2
Transcriptional regulation of granulopoiesis	1.14	0.0196	#NUM!	KMT2A
UVC-Induced MAPK Signaling	1.14	0.0196	#NUM!	PRKCB
B-WICH complex positively regulates rRNA expression	1.13	0.0192	#NUM!	POLR1D
UVB-Induced MAPK Signaling	1.13	0.0192	#NUM!	PRKCB
Meiotic synapsis	1.11	0.0182	#NUM!	STAG1
Interleukin-3, Interleukin-5 and GM-CSF signaling	1.11	0.0182	#NUM!	GRB2
Lymphotoxin β Receptor Signaling	1.11	0.0182	#NUM!	TRAF3
CSDE1 Signaling Pathway	1.1	0.0179	#NUM!	PABPC1
EGF Signaling	1.1	0.0179	#NUM!	GRB2
Signaling by PDGF	1.08	0.0172	#NUM!	GRB2
RUNX1 regulates megakaryocyte differentiation and platelet function	1.08	0.0172	#NUM!	KMT2A
Gap Junction Signaling	1.08	0.00615	#NUM!	GRB2,PRKCB
Signaling by ERBB4	1.08	0.0169	#NUM!	GRB2
Metabolism of water-soluble vitamins and cofactors	1.08	0.0169	#NUM!	PCCB
Pulmonary Fibrosis Idiopathic Signaling Pathway	1.08	0.00613	#NUM!	GRB2,JARID2
Endometrial Cancer Signaling	1.07	0.0167	#NUM!	GRB2
G-Protein Coupled Receptor Signaling	1.07	0.00427	#NUM!	GPR137B,GRB2,PRKCB
NCAM signaling for neurite out-growth	1.06	0.0164	#NUM!	GRB2
UFMylation Signaling Pathway	1.06	0.0161	#NUM!	PABPC1
IL-2 Signaling	1.06	0.0161	#NUM!	GRB2
PXR/RXR Activation	1.04	0.0154	#NUM!	SCD
Activation of IRF by Cytosolic Pattern Recognition Receptors	1.04	0.0154	#NUM!	TRAF3
CD40 Signaling	1.02	0.0149	#NUM!	TRAF3
TNFR2 non-canonical NF-kB pathway	1.02	0.0147	#NUM!	TRAF3
Role of JAK1 and JAK3 in γc Cytokine Signaling	1.01	0.0145	#NUM!	GRB2
Growth Hormone Signaling	0.999	0.0141	#NUM!	PRKCB
Signaling by FGFR2	0.988	0.0137	#NUM!	GRB2
SUMOylation of DNA damage response and repair proteins	0.971	0.0132	#NUM!	STAG1
Angiopoietin Signaling	0.971	0.0132	#NUM!	GRB2
Leptin Signaling in Obesity	0.971	0.0132	#NUM!	GRB2
Macropinocytosis Signaling	0.971	0.0132	#NUM!	PRKCB
TREM1 Signaling	0.966	0.013	#NUM!	GRB2
VDR/RXR Activation	0.961	0.0128	#NUM!	PRKCB
NF-κB Activation by Viruses	0.961	0.0128	#NUM!	PRKCB
DDX58/IFIH1-mediated induction of interferon-alpha/beta	0.955	0.0127	#NUM!	TRAF3
Signaling by MET	0.955	0.0127	#NUM!	GRB2
Renal Cell Carcinoma Signaling	0.955	0.0127	#NUM!	GRB2
IL-17A Signaling in Fibroblasts	0.95	0.0125	#NUM!	PRKCB
Signaling by NTRK1 (TRKA)	0.945	0.0123	#NUM!	GRB2
Chemokine Signaling	0.945	0.0123	#NUM!	PRKCB
FLT3 Signaling in Hematopoietic Progenitor Cells	0.94	0.0122	#NUM!	GRB2
JAK/STAT Signaling	0.94	0.0122	#NUM!	GRB2
LPS-stimulated MAPK Signaling	0.925	0.0118	#NUM!	PRKCB
FGF Signaling	0.921	0.0116	#NUM!	GRB2
HIPPO signaling	0.916	0.0115	#NUM!	MOB1A
Estrogen Receptor Signaling	0.911	0.00489	#NUM!	GRB2,PRKCB
Regulation of Cellular Mechanics by Calpain Protease	0.902	0.0111	#NUM!	GRB2
Unfolded protein response	0.902	0.0111	#NUM!	ERO1B
Acute Myeloid Leukemia Signaling	0.898	0.011	#NUM!	GRB2
Crosstalk between Dendritic Cells and Natural Killer Cells	0.898	0.011	#NUM!	HLA-DRB5
BMP signaling pathway	0.898	0.011	#NUM!	GRB2
Actin Nucleation by ARP-WASP Complex	0.889	0.0108	#NUM!	GRB2
Pyroptosis Signaling Pathway	0.885	0.0106	#NUM!	TRAF3
EPH-Ephrin signaling	0.885	0.0106	#NUM!	Ap2b1
Eukaryotic Translation Termination	0.885	0.0106	#NUM!	RPS19
Interferon gamma signaling	0.885	0.0106	#NUM!	HLA-DRB5
Fcγ Receptor-mediated Phagocytosis in Macrophages and Monocytes	0.885	0.0106	#NUM!	PRKCB
Non-Small Cell Lung Cancer Signaling	0.885	0.0106	#NUM!	GRB2
Eukaryotic Translation Elongation	0.88	0.0105	#NUM!	RPS19
Molecular Mechanisms of Cancer	0.877	0.0035	#NUM!	GPR137B,GRB2,PRKCB
Small Cell Lung Cancer Signaling	0.876	0.0104	#NUM!	TRAF3
TGF-β Signaling	0.872	0.0103	#NUM!	GRB2
p53 Signaling	0.868	0.0102	#NUM!	STAG1
Melanocyte Development and Pigmentation Signaling	0.868	0.0102	#NUM!	GRB2
Apelin Cardiomyocyte Signaling Pathway	0.864	0.0101	#NUM!	PRKCB
S Phase	0.859	0.01	#NUM!	STAG1
Beta-catenin independent WNT signaling	0.852	0.0098	#NUM!	PRKCB
Hematopoiesis from Pluripotent Stem Cells	0.848	0.00447	#NUM!	IGHM,IGKC
Mitotic Prophase	0.848	0.00971	#NUM!	PRKCB
Response of EIF2AK4 (GCN2) to amino acid deficiency	0.848	0.00971	#NUM!	RPS19
Mouse Embryonic Stem Cell Pluripotency	0.844	0.00962	#NUM!	GRB2
IGF-1 Signaling	0.84	0.00952	#NUM!	GRB2
WNK Renal Signaling Pathway	0.836	0.00943	#NUM!	PRKCB
Selenoamino acid metabolism	0.832	0.00935	#NUM!	RPS19
Paxillin Signaling	0.832	0.00935	#NUM!	GRB2
PPAR Signaling	0.832	0.00935	#NUM!	GRB2
PD-1, PD-L1 cancer immunotherapy pathway	0.832	0.00935	#NUM!	HLA-DRB5
Signaling by VEGF	0.829	0.00926	#NUM!	PRKCB
Telomerase Signaling	0.829	0.00926	#NUM!	GRB2
Calcium-induced T Lymphocyte Apoptosis	0.828	0.00435	#NUM!	HLA-DRB5,PRKCB
α-Adrenergic Signaling	0.825	0.00917	#NUM!	PRKCB
Kinetochore Metaphase Signaling Pathway	0.821	0.00909	#NUM!	STAG1
O-linked glycosylation	0.818	0.00901	#NUM!	B3GNT5
Binding and Uptake of Ligands by Scavenger Receptors	0.814	0.00893	#NUM!	IGKC
Prostate Cancer Signaling	0.807	0.00877	#NUM!	GRB2
SRP-dependent cotranslational protein targeting to membrane	0.803	0.0087	#NUM!	RPS19
OX40 Signaling Pathway	0.802	0.00418	#NUM!	HLA-DRB5,TRAF3
PAK Signaling	0.797	0.00855	#NUM!	GRB2
ESR-mediated signaling	0.793	0.00847	#NUM!	STAG1
Nitric Oxide Signaling in the Cardiovascular System	0.786	0.00833	#NUM!	PRKCB
LXR/RXR Activation	0.777	0.00813	#NUM!	SCD
Role of NANOG in Mammalian Embryonic Stem Cell Pluripotency	0.773	0.00806	#NUM!	GRB2
TCR signaling	0.767	0.00794	#NUM!	HLA-DRB5
MHC class II antigen presentation	0.767	0.00794	#NUM!	HLA-DRB5
Pancreatic Adenocarcinoma Signaling	0.767	0.00794	#NUM!	GRB2
ICOS-ICOSL Signaling in T Helper Cells	0.762	0.00394	#NUM!	GRB2,HLA-DRB5
IL-6 Signaling	0.758	0.00775	#NUM!	GRB2
NUR77 Signaling in T Lymphocytes	0.754	0.0039	#NUM!	HLA-DRB5,PRKCB
fMLP Signaling in Neutrophils	0.752	0.00763	#NUM!	PRKCB
CD28 Signaling in T Helper Cells	0.749	0.00387	#NUM!	GRB2,HLA-DRB5
Response to elevated platelet cytosolic Ca2+	0.749	0.00758	#NUM!	PRKCB
P2Y Purinergic Receptor Signaling Pathway	0.746	0.00752	#NUM!	PRKCB
CCR3 Signaling in Eosinophils	0.743	0.00746	#NUM!	PRKCB
Complement cascade	0.74	0.00741	#NUM!	IGKC
Role of PKR in Interferon Induction and Antiviral Response	0.737	0.00735	#NUM!	TRAF3
DHCR24 Signaling Pathway	0.734	0.0073	#NUM!	PRKCB
PIP3 activates AKT signaling	0.726	0.00714	#NUM!	GRB2
Gαi Signaling	0.726	0.00714	#NUM!	GRB2
Insulin Receptor Signaling	0.726	0.00714	#NUM!	GRB2
MSP-RON Signaling in Cancer Cells Pathway	0.726	0.00714	#NUM!	GRB2
Apelin Endothelial Signaling Pathway	0.723	0.00709	#NUM!	PRKCB
Xenobiotic Metabolism General Signaling Pathway	0.717	0.00699	#NUM!	PRKCB
RNA Polymerase II Transcription	0.701	0.00671	#NUM!	SRSF9
PKCθ Signaling in T Lymphocytes	0.698	0.00358	#NUM!	GRB2,HLA-DRB5
PTEN Signaling	0.696	0.00662	#NUM!	GRB2
Corticotropin Releasing Hormone Signaling	0.693	0.00658	#NUM!	PRKCB
Factors Promoting Cardiogenesis in Vertebrates	0.691	0.00654	#NUM!	PRKCB
Type II Diabetes Mellitus Signaling	0.691	0.00654	#NUM!	PRKCB
IL-10 Signaling	0.688	0.00649	#NUM!	HLA-DRB5
Role of Pattern Recognition Receptors in Recognition of Bacteria and Viruses	0.683	0.00641	#NUM!	PRKCB
eNOS Signaling	0.683	0.00641	#NUM!	PRKCB
NF-κB Signaling	0.683	0.0035	#NUM!	PRKCB,TRAF3
IL-4 Signaling	0.676	0.00347	#NUM!	GRB2,HLA-DRB5
HEY1 Signaling Pathway	0.671	0.00621	#NUM!	GRB2
Glucocorticoid Receptor Signaling	0.671	0.00344	#NUM!	GRB2,HLA-DRB5
Phagosome Maturation	0.664	0.0061	#NUM!	HLA-DRB5
CXCR4 Signaling	0.655	0.00595	#NUM!	PRKCB
Androgen Signaling	0.653	0.00592	#NUM!	PRKCB
Gαq Signaling	0.65	0.00588	#NUM!	PRKCB
Glioblastoma Multiforme Signaling	0.648	0.00585	#NUM!	GRB2
Aldosterone Signaling in Epithelial Cells	0.646	0.00581	#NUM!	PRKCB
T Cell Receptor Signaling	0.634	0.00325	#NUM!	GRB2,HLA-DRB5
Protein Sorting Signaling Pathway	0.633	0.00562	#NUM!	TMED5
Acute Phase Response Signaling	0.618	0.00541	#NUM!	GRB2
Major pathway of rRNA processing in the nucleolus and cytosol	0.616	0.00538	#NUM!	RPS19
MicroRNA Biogenesis Signaling Pathway	0.614	0.00535	#NUM!	TUT4
NOD1/2 Signaling Pathway	0.61	0.00529	#NUM!	TRAF3
Systemic Lupus Erythematosus in T Cell Signaling Pathway	0.607	0.00311	#NUM!	GRB2,HLA-DRB5
Production of Nitric Oxide and Reactive Oxygen Species in Macrophages	0.606	0.00524	#NUM!	PRKCB
Regulation of the Epithelial Mesenchymal Transition by Growth Factors Pathway	0.604	0.00521	#NUM!	GRB2
Leukocyte Extravasation Signaling	0.602	0.00518	#NUM!	PRKCB
Xenobiotic Metabolism CAR Signaling Pathway	0.6	0.00515	#NUM!	PRKCB
Regulation of the Epithelial-Mesenchymal Transition Pathway	0.598	0.00513	#NUM!	GRB2
Xenobiotic Metabolism PXR Signaling Pathway	0.598	0.00513	#NUM!	PRKCB
Natural Killer Cell Signaling	0.593	0.00505	#NUM!	GRB2
Adrenomedullin signaling pathway	0.591	0.00503	#NUM!	GRB2
PI3K/AKT Signaling	0.589	0.005	#NUM!	GRB2
Immunoregulatory interactions between a Lymphoid and a non-Lymphoid cell	0.585	0.00495	#NUM!	IGKC
Mitotic Prometaphase	0.583	0.00493	#NUM!	STAG1
HIF1α Signaling	0.572	0.00478	#NUM!	PRKCB
IL-8 Signaling	0.571	0.00476	#NUM!	PRKCB
Integrin Signaling	0.567	0.00472	#NUM!	GRB2
Autophagy	0.558	0.00461	#NUM!	TRAF3
Hepatic Cholestasis	0.548	0.00448	#NUM!	PRKCB
NAFLD Signaling Pathway	0.543	0.00442	#NUM!	SCD
Mitotic Metaphase and Anaphase	0.529	0.00426	#NUM!	STAG1
NRF2-mediated Oxidative Stress Response	0.526	0.00422	#NUM!	PRKCB
Sertoli Cell-Sertoli Cell Junction Signaling	0.517	0.00412	#NUM!	GRB2
Actin Cytoskeleton Signaling	0.516	0.0041	#NUM!	GRB2
Cohesin Chromatin Regulation Pathway	0.511	0.00405	#NUM!	STAG1
Pancreatic Secretion Signaling Pathway	0.51	0.00403	#NUM!	PRKCB
Wound Healing Signaling Pathway	0.504	0.00397	#NUM!	GRB2
Sperm Motility	0.497	0.00389	#NUM!	PRKCB
Cardiac Hypertrophy Signaling	0.491	0.00383	#NUM!	GRB2
RAF/MAP kinase cascade	0.49	0.00382	#NUM!	GRB2
Deubiquitination	0.489	0.0038	#NUM!	TRAF3
Colorectal Cancer Metastasis Signaling	0.478	0.00369	#NUM!	GRB2
Chronic Myeloid Leukemia Signaling	0.469	0.0036	#NUM!	GRB2
Eicosanoid Signaling	0.466	0.00357	#NUM!	PRKCB
CLEAR Signaling Pathway	0.46	0.00351	#NUM!	PRKCB
Processing of Capped Intron-Containing Pre-mRNA	0.458	0.00348	#NUM!	SRSF9
Sirtuin Signaling Pathway	0.453	0.00344	#NUM!	POLR1D
Xenobiotic Metabolism Signaling	0.449	0.0034	#NUM!	PRKCB
Role of Osteoclasts in Rheumatoid Arthritis Signaling Pathway	0.433	0.00325	#NUM!	GRB2
Cachexia Signaling Pathway	0.373	0.00272	#NUM!	PRKCB
Pathogen Induced Cytokine Storm Signaling Pathway	0.371	0.0027	#NUM!	HLA-DRB5
FAK Signaling	0.34	0.00193	#NUM!	GPR137B,GRB2
Protein Kinase A Signaling	0.338	0.00243	#NUM!	PRKCB
Lipid Antigen Presentation by CD1	0.335	0.00241	#NUM!	Ap2b1
Hepatic Fibrosis Signaling Pathway	0.333	0.0024	#NUM!	PRKCB
Antiproliferative Role of TOB in T Cell Signaling	0.326	0.00235	#NUM!	PABPC1
Graft-versus-Host Disease Signaling	0.312	0.00224	#NUM!	HLA-DRB5
RHO GTPase cycle	0.309	0.00222	#NUM!	GRB2
Regulation of IL-2 Expression in Activated and Anergic T Lymphocytes	0.301	0.00216	#NUM!	GRB2
G Protein Signaling Mediated by Tubby	0.297	0.00214	#NUM!	GRB2
T Helper Cell Differentiation	0.296	0.00212	#NUM!	HLA-DRB5
BBSome Signaling Pathway	0.284	0.00204	#NUM!	GPR137B
CCR5 Signaling in Macrophages	0.278	0.002	#NUM!	PRKCB
SAPK/JNK Signaling	0.277	0.00199	#NUM!	GRB2
Type I Diabetes Mellitus Signaling	0.272	0.00196	#NUM!	HLA-DRB5
Cardiac Hypertrophy Signaling (Enhanced)	0.254	0.00185	#NUM!	PRKCB
T Cell Exhaustion Signaling Pathway	0.242	0.00176	#NUM!	HLA-DRB5
CDC42 Signaling	0.237	0.00174	#NUM!	HLA-DRB5
TEC Kinase Signaling	0.236	0.00173	#NUM!	PRKCB
Cellular Effects of Sildenafil (Viagra)	0	0.00145	#NUM!	GPR137B
