# Supplementary material for: Hyperchylomicronemia causes endothelial cell inflammation and increases atherosclerosis
Source: Research Square preprint supplement (doi:10.21203/rs.3.rs-5451391/v1), 2024-11-24
Supplement: Supplementary file 2 [file aa49ff90f96dd9756aec8c5f.xlsx]

## Sheet: DEGs_Total_ACs
Genes	p_val	avg_log2FC	pct.1	pct.2
Spock1	5.18718849815724e-13	4.84982	0.605	0.029
Nudt12os	8.2993871784897e-07	3.90556	0.355	0.029
Cntnap2	1.76676297769383e-06	3.57067	0.395	0.057
Morc2a	2.2909123960013e-07	3.3317	0.474	0.086
Pccb	4.64057644461323e-06	3.08668	0.408	0.086
Eml4	0.00241483	2.98702	0.579	0.329
Gm48591	0.00375433	2.53058	0.224	0.057
Pcdh9	0.00867	2.442	0.211	0.057
Cd8b1	0.000820363	2.21164	0.342	0.129
Tox	3.92187836546535e-05	2.16278	0.368	0.086
4930519A11Rik	0.00176827	1.95618	0.132	0
Trbc2	0.0014916	1.45021	0.592	0.4
Lat	4.12678027376261e-06	1.38426	0.618	0.257
Bcl11b	1.16404824677166e-05	1.36348	0.421	0.086
Thy1	2.79093286160038e-05	1.3592	0.539	0.214
Cd8a	0.000284267	1.34434	0.329	0.086
Lef1	4.63428846178797e-05	1.32902	0.461	0.143
Igfbp4	0.00759189	1.28214	0.263	0.1
Trac	0.00225498	1.2326	0.408	0.186
Rnf19a	0.00980743	1.22266	0.237	0.086
Cd3d	0.000447009	1.19013	0.447	0.186
Tcf7	0.0002199	1.17889	0.447	0.157
Cd3g	0.000302135	1.17756	0.474	0.186
Dnah7a	0.00494563	1.14072	0.263	0.086
4732419C18Rik	0.00176827	1.12776	0.132	0
Rgcc	0.000169298	1.1198	0.461	0.171
Satb1	0.00013022	1.11444	0.592	0.271
Dock9	0.000616063	1.1109	0.237	0.043
Ldhb	0.00772369	1.11	0.263	0.1
Cd247	8.21796771150912e-05	1.02591	0.526	0.2
Vamp1	0.00150993	1.01587	0.289	0.086
Cd3e	0.000150082	1.00889	0.526	0.214
Araf	0.000412627	1.00644	0.421	0.143
Ccr9	0.00770193	0.92617	0.25	0.086
Robo2	0.00271511	0.918701	0.211	0.043
Clstn2	0.00312321	0.89072	0.118	0
Rinl	0.000199859	0.872906	0.461	0.186
Srpk2	0.000433793	0.854932	0.605	0.343
2610035D17Rik	0.0020301	0.845199	0.395	0.171
Ms4a4b	0.0080521	0.832333	0.368	0.171
Kcnj6	0.00446127	0.816496	0.171	0.029
Skap1	0.000148059	0.801175	0.566	0.243
Rflnb	0.00930827	0.79593	0.171	0.043
Ctsw	0.00407337	0.792744	0.224	0.057
Snrpc	0.000498349	0.790793	0.526	0.257
Grcc10	0.000591	0.789423	0.697	0.457
Lck	0.000682874	0.787991	0.579	0.286
Sit1	8.70238071683987e-05	0.781451	0.289	0.043
Plekha7	0.00550216	0.779971	0.105	0
Emc10	0.000167362	0.773104	0.513	0.214
Brip1os	0.00192543	0.770671	0.303	0.1
Bloc1s5	5.45954977653549e-05	0.76524	0.447	0.157
Slc25a4	0.00145317	0.764214	0.513	0.3
Tubb5	0.00597237	0.756012	0.658	0.543
Ckap2	0.00736379	0.754931	0.158	0.029
Ablim1	0.00350041	0.752049	0.461	0.229
Hmgn2	0.00199011	0.746708	0.618	0.4
Mgst2	0.000185052	0.735652	0.289	0.057
Abhd8	0.000184458	0.734725	0.395	0.114
Plcxd2	0.00982391	0.732953	0.329	0.143
Cks1b	0.00924191	0.730487	0.197	0.057
Nsg2	0.00193159	0.720105	0.263	0.071
Itk	0.000184537	0.710255	0.421	0.129
Saraf	0.000603062	0.707421	0.697	0.414
Hdac7	7.12343301797086e-05	0.707373	0.355	0.071
Xrcc6	0.00589216	0.706711	0.276	0.1
Ccnl2	0.000974255	0.706227	0.553	0.286
Fbxl12	0.00747587	0.694411	0.224	0.071
Lsg1	0.000824694	0.677336	0.316	0.1
Ndufa10	0.00440211	0.663276	0.5	0.286
Ramac	0.000581659	0.660569	0.474	0.214
Inpp5k	0.000650504	0.660028	0.368	0.114
Rnf167	0.000164732	0.659586	0.605	0.257
Rras2	0.00142139	0.65834	0.303	0.1
Tes	0.000838612	0.654425	0.355	0.129
Ndufb11	0.00414576	0.647876	0.605	0.414
Pycr2	0.009192	0.641961	0.289	0.129
Hmgn1	0.00842386	0.63976	0.434	0.243
Cct8	0.00659461	0.639434	0.513	0.329
Ypel3	0.00648719	0.639007	0.671	0.443
Arhgap9	0.000687096	0.638512	0.724	0.443
Themis	0.00083526	0.636772	0.382	0.129
Sox4	0.00398221	0.634447	0.303	0.1
Pcbp2	0.00326941	0.631131	0.763	0.629
Myb	0.00498139	0.625305	0.224	0.057
Med30	0.000654168	0.62436	0.382	0.143
Paxx	0.00010012	0.621698	0.303	0.057
Plcg1	0.00186802	0.613539	0.25	0.057
Sh2d1a	0.00416417	0.61143	0.316	0.114
Prkag1	0.000907234	0.610705	0.526	0.286
Ruvbl1	6.00289015536199e-05	0.609143	0.342	0.071
Glrx3	0.00442224	0.60786	0.447	0.243
Ramp1	0.00991375	0.60494	0.539	0.343
Ntrk3	0.000251598	0.600613	0.211	0.014
Ccr7	0.00385825	0.599562	0.276	0.086
Rgs14	0.00494354	0.592044	0.316	0.129
Commd10	0.00141869	0.585994	0.382	0.157
Tbxa2r	0.00129124	0.581387	0.224	0.043
Prdx6	0.00173059	0.581358	0.553	0.314
Psip1	0.00494278	0.580393	0.395	0.2
Gm8797	0.00170995	0.579305	0.711	0.529
Fam189b	0.000472483	0.574502	0.355	0.1
Cd5	0.0075945	0.574396	0.263	0.086
Sf3b6	0.00321565	0.571871	0.632	0.4
Shmt2	0.00296001	0.568015	0.303	0.114
Dpyd	0.00710245	0.566749	0.132	0.014
Ccm2	0.00356538	0.561773	0.566	0.343
Fyn	0.00734217	0.560734	0.461	0.243
Yjefn3	0.00730161	0.560452	0.579	0.343
Uqcrc2	0.00226654	0.558608	0.487	0.271
Rac2	0.00356097	0.555636	0.776	0.629
Cd27	0.000643904	0.554029	0.447	0.157
Znrf1	0.00332739	0.552411	0.526	0.286
Cdkn2d	0.00778731	0.544596	0.395	0.2
Ndufv3	0.00567941	0.542796	0.566	0.357
Pacsin1	0.0036089	0.538884	0.171	0.029
Pglyrp2	0.00547029	0.537182	0.197	0.043
Arl3	0.00638252	0.530819	0.303	0.129
Igtp	0.00182255	0.525504	0.303	0.086
Cd96	0.000116735	0.521567	0.368	0.086
Syf2	0.00288718	0.517174	0.618	0.371
Zap70	0.00342199	0.516067	0.368	0.143
Mrps9	0.00112644	0.507892	0.355	0.129
Dera	0.00953745	0.498629	0.303	0.129
Pank2	0.00480649	0.496809	0.289	0.1
Csnk2a1	0.00287513	0.496054	0.5	0.286
Pabpn1	0.000828152	0.496004	0.461	0.2
Adcy6	0.00176827	0.495431	0.132	0
Nubp2	0.00871761	0.494092	0.276	0.114
A430093F15Rik	0.000997696	0.487812	0.145	0
Prkcq	0.0059465	0.484719	0.382	0.171
Gm15494	0.00242855	0.483774	0.447	0.2
Ehd3	0.000560593	0.483151	0.158	0
Brd8	0.00997372	0.472506	0.329	0.143
1500011B03Rik	0.00626968	0.470223	0.263	0.1
Fam78a	0.00528363	0.461319	0.237	0.071
Trim27	0.00491118	0.458479	0.355	0.157
Rpa3	0.00623964	0.458107	0.342	0.157
Ssbp2	0.00323961	0.457729	0.434	0.2
Leprotl1	0.00218612	0.454549	0.566	0.343
Txk	0.00259562	0.452655	0.342	0.114
Itgae	0.00410212	0.450446	0.145	0.014
Tmem108	0.00181089	0.446434	0.224	0.043
Tmie	0.00550216	0.445243	0.105	0
Rhno1	0.00234189	0.445168	0.237	0.057
Cox20	0.00729128	0.444607	0.513	0.3
Wbp1	0.000290984	0.441277	0.263	0.043
Ubash3a	0.00204458	0.441062	0.276	0.071
Tshz2	0.00550216	0.44048	0.105	0
Spint2	0.00458079	0.440358	0.447	0.2
Adgrg5	0.00242167	0.436205	0.158	0.014
Socs1	0.00236044	0.433202	0.329	0.114
Thumpd1	0.00020578	0.432828	0.329	0.071
Gbp2	0.000752595	0.428893	0.289	0.071
Ssbp1	0.0042787	0.427653	0.408	0.2
2600014E21Rik	0.00254218	0.422264	0.303	0.1
Tcp1	0.00461684	0.41772	0.553	0.329
Ppan	0.0043535	0.417211	0.303	0.114
Gm20033	0.00432063	0.412061	0.145	0.014
Scfd1	0.0031022	0.404822	0.421	0.186
Frmpd4	0.00139289	0.402564	0.289	0.071
B4galt7	0.00357596	0.402167	0.25	0.071
Surf1	0.00645033	0.401147	0.355	0.171
Hadha	0.00639285	0.399919	0.421	0.2
Dctn3	0.00993808	0.397478	0.447	0.257
Pex16	0.000894577	0.39328	0.237	0.043
Suclg1	0.0058811	0.392941	0.474	0.243
Dok2	0.000968995	0.385182	0.408	0.143
Akr1c13	0.0026196	0.384266	0.158	0.014
Naa10	0.00934001	0.381082	0.289	0.129
Ndufaf7	0.00512919	0.380907	0.263	0.086
Tfdp1	0.00589216	0.379446	0.276	0.1
Drosha	0.00118063	0.37778	0.171	0.014
Gpatch2	0.0035836	0.377258	0.276	0.086
Ostc	0.00237835	0.376003	0.5	0.286
Slamf6	0.00782311	0.375229	0.303	0.114
Fh1	0.00318034	0.374829	0.25	0.071
Flywch1	0.000997696	0.374601	0.145	0
Slc25a23	0.00728685	0.374408	0.132	0.014
Tmem9	0.00132494	0.366412	0.197	0.029
Mylpf	0.00312321	0.361546	0.118	0
Nck2	0.00872627	0.357587	0.263	0.086
Stambpl1	0.00568277	0.356506	0.382	0.171
Commd5	0.00670431	0.352002	0.184	0.043
Wdr45	0.00432859	0.351227	0.224	0.057
Fbxo31	0.00107399	0.346991	0.237	0.043
Ifitm10	0.00924191	0.343752	0.197	0.057
Acbd6	0.0084787	0.341186	0.342	0.157
Mamdc4	0.0034173	0.339618	0.263	0.071
Ptprf	0.00312321	0.334771	0.118	0
Rtl8a	0.00767692	0.334377	0.289	0.114
Anxa6	0.000716395	0.333868	0.592	0.286
Commd3	0.0038931	0.333716	0.382	0.157
Mcm2	0.00399138	0.331102	0.224	0.057
Zfp799	0.00229743	0.328085	0.158	0.014
Qsox1	0.00168173	0.32779	0.25	0.057
Map7	0.00736379	0.326454	0.158	0.029
Izumo4	0.00672834	0.325871	0.211	0.057
Edc3	0.00135773	0.324165	0.197	0.029
Pick1	0.000997696	0.322662	0.145	0
Bex3	0.000991541	0.316842	0.316	0.086
Tomm20	0.00922622	0.310627	0.526	0.329
Eng	0.00674617	0.305458	0.132	0.014
Ilkap	0.00879641	0.301509	0.355	0.157
Smo	0.00674617	0.299329	0.132	0.014
Dusp10	0.00850456	0.297427	0.211	0.057
Xpc	0.00265325	0.292899	0.237	0.057
Hadhb	0.00792127	0.291112	0.355	0.157
Uba1	0.00112213	0.288837	0.539	0.257
Rapgef4	0.00595018	0.288098	0.197	0.043
Rhoh	0.00605348	0.288085	0.553	0.343
A630014C17Rik	0.00421009	0.28635	0.145	0.014
Tnfrsf18	0.00166623	0.273758	0.289	0.071
Tmsb15b2	0.00916889	0.268201	0.184	0.043
2900076A07Rik	0.000997696	0.26525	0.145	0
Nars2	0.00825181	0.264365	0.158	0.029
Ptdss2	0.00409207	0.262273	0.211	0.043
1700097N02Rik	0.00290652	0.261083	0.158	0.014
Pxmp4	0.00365047	0.259615	0.276	0.086
Fam216a	0.00547029	0.255245	0.197	0.043
Nsmce1	0.00578274	0.247076	0.329	0.143
Mrpl58	0.00116942	0.24572	0.434	0.2
1110002L01Rik	0.00747554	0.244955	0.132	0.014
Pdcd6	0.00779257	0.243569	0.579	0.357
Eef1akmt1	0.000406075	0.240378	0.329	0.086
Dnal4	0.00656246	0.230456	0.158	0.029
Zfp386	0.00900954	0.226812	0.211	0.057
Traf4	0.00861944	0.22154	0.184	0.043
Tmem223	0.00564757	0.221481	0.342	0.143
Prkd2	0.00364627	0.208213	0.421	0.171
Tubg1	0.00296371	0.20688	0.211	0.043
Nelfcd	0.00179136	0.204848	0.25	0.057
Mospd1	0.00312321	0.203955	0.118	0
Cenpm	0.00550216	0.197966	0.105	0
Tmc8	0.00446566	0.197941	0.276	0.086
Marcksl1	0.0098035	0.197154	0.276	0.1
Reck	0.00747554	0.193842	0.132	0.014
Ctdp1	0.00692225	0.193024	0.132	0.014
Klc2	0.00550216	0.185613	0.105	0
Bcs1l	0.00478958	0.177349	0.145	0.014
Faap24	0.00848627	0.176742	0.132	0.014
Zfp771	0.00991089	0.17188	0.211	0.057
Snx4	0.0048323	0.17159	0.395	0.186
Tefm	0.00550216	0.170913	0.105	0
Gm5914	0.00857388	0.168004	0.237	0.071
Ada	0.00312321	0.156671	0.118	0
BC051226	0.00550216	0.134341	0.105	0
Hnrnpdl	0.00578965	0.132979	0.632	0.4
Zfp868	0.0034173	0.132471	0.263	0.071
Dalrd3	0.00544238	0.1039	0.276	0.086
Rbm22	0.00393758	0.102207	0.421	0.171
Iftap	0.00646769	0.0990691	0.197	0.043
Lsm6	0.00942353	0.0898814	0.487	0.271
Mbd4	0.00197879	0.0876849	0.224	0.043
Jmjd7	0.00870251	0.0871786	0.132	0.014
Gdi1	0.00642856	0.0458603	0.553	0.329
Hacd3	0.00469143	0.0388165	0.224	0.057
Mns1	0.00688202	0.0240996	0.197	0.043
Ufd1	0.00692855	0.00732035	0.342	0.143
Rapgef3	0.0065841	-0.0136456	0.171	0.029
Mxd4	0.000805915	-0.0341943	0.539	0.271
Pparg	0.00188876	-0.0639596	0.039	0.214
Ric1	0.00961645	-0.0985821	0.053	0.2
Fut4	0.00496523	-0.166709	0	0.1
Irak3	0.00858963	-0.208499	0.039	0.171
Prdm1	0.00494376	-0.225675	0.053	0.214
Clec5a	0.00496523	-0.226916	0	0.1
Dusp1	0.00643921	-0.262311	0.368	0.586
Rffl	0.00100718	-0.262471	0.053	0.257
Nuak2	0.00631024	-0.266002	0.066	0.229
Abca16	0.00496523	-0.277265	0	0.1
Ptprj	0.00758163	-0.291055	0.289	0.5
Btk	0.00854114	-0.333604	0.118	0.3
Zfp808	0.00275064	-0.357121	0.026	0.171
Rims2	0.00558341	-0.369528	0.026	0.157
Wdfy1	0.00858963	-0.412975	0.039	0.171
Snx8	0.00490535	-0.419309	0.079	0.257
Dgkq	0.00496523	-0.426118	0	0.1
Gsap	0.00574001	-0.457034	0.105	0.286
A630001G21Rik	0.00343907	-0.459896	0.145	0.357
Cebpa	0.00813148	-0.46786	0.105	0.271
Ralgds	0.00442562	-0.471995	0.039	0.186
Cd83	0.00498139	-0.494267	0.066	0.229
Tmem178b	0.00076269	-0.495699	0.013	0.171
Jarid2	0.00917601	-0.505703	0.263	0.457
Pptc7	0.00563944	-0.52625	0.132	0.314
Niban2	0.0058627	-0.529295	0.013	0.129
Gm32592	0.000686283	-0.532728	0	0.143
Chd7	0.00246911	-0.532901	0.184	0.414
Cd86	0.00890225	-0.538677	0.132	0.3
Junb	0.00956578	-0.541909	0.526	0.7
Fam122c	0.00133169	-0.543123	0	0.129
Fah	0.000686283	-0.554531	0	0.143
Slamf7	9.111347234382e-05	-0.576181	0	0.186
Reps1	0.00772369	-0.576366	0.105	0.271
Rasa4	0.00955168	-0.583762	0.092	0.243
Clic4	0.00173843	-0.588712	0.197	0.414
Pibf1	0.00934001	-0.591227	0.132	0.3
Uap1l1	0.00759189	-0.605223	0.105	0.271
Ctsc	0.00657102	-0.618147	0.382	0.543
Adgre5	0.00738422	-0.632361	0.513	0.657
Lyz2	0.00262738	-0.639994	0.355	0.586
Snhg15	0.00368541	-0.643085	0.039	0.186
Pim1	0.00705388	-0.644333	0.421	0.557
Lin54	0.00127428	-0.655645	0.079	0.286
S100a6	0.0095562	-0.657971	0.382	0.614
Clasp1	0.000583687	-0.688486	0.079	0.3
Syk	0.00527728	-0.692142	0.342	0.557
Itgav	0.00128919	-0.693086	0.105	0.329
Hck	0.00258943	-0.701632	0.171	0.4
Plekho2	0.00185622	-0.711744	0.197	0.414
Inpp5d	0.00332627	-0.712957	0.342	0.557
Sdc4	0.000719994	-0.722031	0.013	0.171
Apoe	0.00347031	-0.747923	0.303	0.514
Atp2b1	0.00319407	-0.748859	0.342	0.586
Calm1	0.00167254	-0.749794	0.75	0.829
Pou2f2	0.00873637	-0.75091	0.197	0.371
Ptms	0.00446639	-0.769284	0.263	0.486
Abca1	0.00508565	-0.781281	0.158	0.357
Traf3	0.000360325	-0.78496	0.092	0.329
Irf5	0.00473436	-0.819554	0.171	0.371
Napsa	0.00384804	-0.832037	0.197	0.414
Lilrb4b	0.00905443	-0.833164	0.184	0.371
Ier5	0.00477624	-0.838132	0.421	0.629
Cd300c2	0.0044612	-0.850894	0.145	0.343
Siglecg	0.00840374	-0.854349	0.039	0.171
Lyn	0.00026535	-0.876834	0.329	0.586
Tyrobp	0.00103812	-0.878714	0.316	0.586
Rab32	0.00138099	-0.879583	0.105	0.314
Myo1e	0.00140821	-0.887726	0.026	0.186
Nr1h3	9.3067040393179e-05	-0.914864	0.013	0.214
Fcgr2b	0.00153591	-0.916061	0.184	0.429
Iglc2	0.00572089	-0.916449	0.026	0.157
Gpx1	0.0044058	-0.917572	0.684	0.8
Dynlt2b	0.00375433	-0.971876	0.066	0.229
Bcl2a1b	0.00633037	-0.986139	0.132	0.314
Bcl2a1d	0.00450105	-1.00551	0.118	0.3
Cybb	0.00122165	-1.03215	0.211	0.457
Tgm2	0.00285191	-1.03969	0.066	0.243
Ly86	0.000106933	-1.04802	0.237	0.543
Gm2a	0.00361445	-1.08161	0.382	0.543
Zfp36	0.00514573	-1.09711	0.513	0.671
H2-Ab1	0.000466358	-1.10902	0.316	0.586
C1qb	0.00743389	-1.14332	0.105	0.286
Id2	0.0020888	-1.16903	0.263	0.471
H2-Eb1	1.8354895263328e-05	-1.17107	0.197	0.557
Cyba	0.000800847	-1.18887	0.671	0.786
Ifi30	0.000384544	-1.19736	0.211	0.5
Atf3	0.00189332	-1.20363	0.105	0.3
Irf8	0.00219776	-1.21422	0.184	0.386
Fcer1g	0.000762601	-1.21899	0.329	0.571
Mpeg1	0.00245149	-1.24385	0.211	0.414
Ctsh	3.11697120068296e-05	-1.25931	0.171	0.5
H2-Aa	7.02554001405024e-05	-1.26532	0.224	0.543
Atad2b	0.00936228	-1.2813	0.289	0.471
Cd74	1.54597379583637e-05	-1.30321	0.368	0.7
Bax	0.00326304	-1.31166	0.434	0.571
Ctsz	0.000826338	-1.45593	0.408	0.6
S100a4	0.000151836	-1.54444	0.224	0.5
Aif1	0.0042284	-1.58829	0.105	0.271
Ctss	8.80122263783518e-05	-1.64523	0.513	0.686
Rgs1	0.00216133	-1.69993	0.105	0.3
Psap	0.00053878	-1.71043	0.816	0.857
Cd68	0.000264713	-1.7218	0.211	0.443
Lgals3	0.00163356	-1.72419	0.329	0.543
Fth1	0.000728138	-1.75212	0.763	0.857
Igkc	0.0046306	-1.78426	0.039	0.186
Gm30211	0.00311685	-1.86593	0.026	0.171
Lgmn	0.000441989	-1.91726	0.237	0.471
Ccl2	0.00629422	-2.03869	0.039	0.171
Lsamp	3.14054885842742e-10	-2.44507	0.105	0.571
