# Supplementary material for: Hyperchylomicronemia causes endothelial cell inflammation and increases atherosclerosis
Source: Research Square preprint supplement (doi:10.21203/rs.3.rs-5451391/v1), 2024-11-24
Supplement: Supplementary file 3 [file d638df65fd13628b64dea6ef.xlsx]

## Sheet: ST3
Gene Symbol	RNA.1_B.KO	RNA.2_B.KO	RNA.2_B.WT	RNA.0_B.WT	RNA.1_B.WT	RNA.0_B.KO
Xkr4	0	0	0	0	0	0
Gm1992	0.014233	0	0	0	0	0
Gm19938	0	0	0	0	0	0
Gm37381	0	0	0	0	0	0
Rp1	0.014233	0	0	0.0281836	0	0
Sox17	0	0	0	0	0	0
Gm37587	0	0	0	0	0	0
Gm37323	0	0	0	0	0	0
Mrpl15	0.690348	1.03388	0.781892	0.148373	0.886876	0.325539
Lypla1	0.346383	1.13451	0.982524	0.264032	0.714989	0.257919
Tcea1	1.20446	1.45277	1.21737	0.641572	0.541968	0.740519
Rgs20	0	0	0	0	0	0
Gm16041	0	0	0	0	0	0
Atp6v1h	0.326335	1.49592	0.782537	0.930104	0.640938	0.114522
Oprk1	0	0	0	0	0	0
Npbwr1	0	0	0	0	0	0
Rb1cc1	0.674979	0.382185	0.446431	0.388769	0.747556	1.03798
4732440D04Rik	0	0	0	0	0	0
Alkal1	0	0.512033	0	0	0	0
St18	0.0141659	0	0	0.648435	0	0
Pcmtd1	0.183949	1.43417	2.95126	0.286789	0.40163	0.202251
Gm26901	0	0	0.183066	0	0	0
Gm30414	0	0	0	0	0	0
Sntg1	0.823504	3.96577	0.145252	0.244703	0.26652	0.390674
Rrs1	0.254994	0.274497	0.108859	0.0273328	0.312034	0.0545786
Adhfe1	1.68852	1.22594	1.0905	0.560011	1.47397	0.716285
2610203C22Rik	0	0	0	0.0525736	0	0.0223043
Vxn	0	0	0	0	0	0
Gm29520	0	0	0	0	0	0
Mybl1	0.0631768	0	0.0157041	0	0	0
Vcpip1	0.286736	0.330997	0.731393	0.299502	0	1.26621
1700034P13Rik	0.129288	0	1.40216	0.0140918	0	0
Sgk3	0.210049	0.819725	0.799393	0.944294	0.500683	0.69833
Mcmdc2	0	0	0	0	0	0.150204
Snhg6	1.56672	0.771084	0.290999	0.563198	1.48397	0.106057
Tcf24	0	0	0	0	0	0
Ppp1r42	0	0	0	0	0	0
Gm15818	0	0	0	0	0	0
Cops5	0.398767	0.536119	0	0.534681	1.42964	0.316424
Cspp1	0.718842	0.586648	0.582671	0.910764	0.367865	0.544828
Arfgef1	0.510907	0.480057	0.766132	0.625082	0.0750818	1.27422
Cpa6	0.126887	0.431332	0	0.154799	0	0.0454256
Prex2	0.0503394	0.357769	0	0.0356158	0.292783	0
A830018L16Rik	0	0.475715	0	0	0	0
Gm17644	0	0	0	0	0	0
Gm29663	0	0	0	0	0	0
Sulf1	0.0729327	0.951861	0	0	0	0
Slco5a1	0	0	0	0	0	0
Gm29283	0	0	0	0	0	0
Prdm14	0	0	0	0	0	0.074903
Ncoa2	0.830185	1.31275	2.18857	1.03429	0.292783	1.26612
Gm29570	0	0	0.0363926	0.0262724	0	0
Tram1	1.33512	1.03974	1.81384	0.879461	0.748419	0.679716
Lactb2	0.313777	0	0.102955	0.115555	0.104134	0.0746422
Xkr9	0	0	0	0	0	0
Eya1	0.161094	0.358307	0	0	0	0
Gm9947	0	0	0	0	0	0
Msc	0.0182332	0	0	0	0	0
Trpa1	0	0	0	0	0	0
Kcnb2	0.126064	0.0679787	0	0.0117538	0	0
Terf1	0.389966	0.814553	1.02778	0.498014	0.223969	0.104487
Sbspon	0	0	0	0	0	0
4930444P10Rik	0	0	0.0157041	0	0	0
Rpl7	19.3414	5.90981	6.08884	8.64299	18.6357	7.43665
Rdh10	0.0621722	0.119256	0.125336	0.0345066	0.103766	0
Gm28095	0	0	0	0	0	0
Stau2	0.0116745	0.358307	0.749021	0.0671681	0	0.0223043
Gm7568	0	0	0	0	0	0
Ube2w	0.20519	0.507314	0.35438	0.257611	0	0.209424
Eloc	1.14402	1.26481	0.3544	1.09633	2.10252	0.554424
D030040B21Rik	0	0	0	0	0	0
Tmem70	0.448569	0.0763493	0.324394	0.557025	0.740759	0.554737
Ly96	0.0182332	0.32438	0	0.33143	0	0.499935
Gm28376	0.0279029	0	0	0	0	0
Jph1	0.00583724	0	0	0	0	0.0454256
Gm28783	0	0	0	0	0	0
Gdap1	0	0	0	0	0	0
Gm28784	0	0	0	0	0	0
Pi15	0	0	0	0	0	0
Gm28154	0	0	0	0	0	0
Gm16070	0	0	0	0.0345066	0	0
Crispld1	0.0136666	0.119256	0	0	0	0
Gm28153	0	0	0	0	0	0
Gm28756	0	0	0	0	0	0
Crisp4	0	0	0	0	0	0
Defb18	0	0	0	0	0	0
Defb41	0	0	0	0	0	0
Gm15825	0	0	0	0	0	0
Tfap2d	0.00914589	0	0	0.0117538	0	0
Tfap2b	0	0	0	0	0	0
Gm28340	0	0	0	0	0	0
Pkhd1	0.149422	0	0.0363926	0.0517209	0	0.270433
4930486I03Rik	0	0	0	0	0	0
Lincmd1	0	0	0	0	0	0
Il17a	0	0	0	0	0	0
Il17f	0	0	0	0	0	0
Mcm3	0.454775	0.32438	0.190352	0.231211	1.05199	0.0317951
Gm28065	0	0	0	0	0	0
6720483E21Rik	0	0	0	0	0	0
Paqr8	0.0331539	0	0	0	0	0.0545786
Efhc1	0	0	0	0	0	0
Tram2	0.0554287	0	0	0.0302064	0.0750818	0
Gm28287	0	0	0	0	0	0
Tmem14a	0.0350591	0	0	0	0	0
Gsta3	0	0	0	0	0	0
Gm28836	0.014233	0	0	0	0	0
Khdc1a	0.559478	0	0	0	0	0
Khdc1c	0.0230135	0	0	0	0	0
Khdc1b	0	0	0	0	0	0
Kcnq5	1.04627	0.577352	2.49326	0.143814	0.702892	0
Rims1	0.0706716	0	0	0.0302064	0	0
Gm29506	0.0350591	0	0	0	0	0
Ppp1r14bl	0	0	0	0	0	0
Gm27028	0	0	0	0	0	0
Gm29107	0	0	0	0	0	0
Ogfrl1	0.0273332	0.0381746	0.183066	0.792805	0	1.7142
Gm28822	0	0	0	0	0	0
B3gat2	0	0	0	0	0	0
Smap1	0.248075	0.301577	0.142063	0.355618	0.439751	0.0768829
Sdhaf4	0.314139	0	0.108859	0.230119	0.328103	0.108678
Fam135a	0	0.238513	0	0.0140918	0	0
Col9a1	0	0	0	0	0	0
Col19a1	0.0136666	0.271025	0	0.0108997	0	0.0223043
Lmbrd1	0.241842	0.220677	1.47941	0.500602	0.976518	0.918731
Gm28237	0	0	0	0	0	0
Gm29414	0	0	0	0	0	0
Adgrb3	0.0288978	0.358307	0.293376	0.040972	0	0
4931408C20Rik	0	0	0	0	0	0
Gm5524	0	0	0	0	0	0
Gm597	0	0	0	0	0	0
Gm9898	0	0	0.0679879	0	0	0
Phf3	0.203937	1.05319	0.632935	0.408886	0.708507	0.688424
Ptp4a1	0.0772701	0	0	0.122651	0	0.576385
Ptp4a1.1	0.0136666	0	0	0.389554	0.150164	0.712398
Gm5698	0	0	0	0	0	0
4931428L18Rik	0.014233	0	0	0	0	0.0598788
Gm28644	0	0	0	0	0	0
Gm29128	0	0	0	0	0	0
Lgsn	0	0	0.382731	0	0.150139	0.32076
Dnaaf6	0	0	0	0	0	0
Khdrbs2	0	0.908515	0.0169863	0.101112	0.0979729	0
Semp2l1	0	0	0	0	0	0
Gm37724	0	0	0	0	0	0
Gm37591	0	0	0	0	0	0
Prim2	0.625749	0	0.190352	0.106788	0.095719	0.0428471
Rab23	0	0	0.151863	0.0492451	0.292783	0
Bag2	0.0901835	0.196367	0	0.0604127	0	0
Zfp451	0.135547	0.157431	0.329176	0.114597	0.0979729	0.164366
Bend6	0	0	0.0370374	0.0553618	0	0
Dst	0.0456122	1.77903	0	0.180365	0.0478595	0
Gm26788	0	0	0	0	0	0
Gm37958	0	0	0	0	0	0
Gm37233	0	0	0	0	0	0
Ccdc115	0.312111	1.04137	0	0.298439	0.364606	0.539881
Gm28306	0	0	0	0	0	0
Imp4	0.552917	0.437675	1.0303	0.402282	1.29429	0.716208
Ptpn18	3.20878	0.865929	2.73129	3.01133	3.85179	1.22011
Gm28417	0.122576	0	0.154233	0	0.0750818	0
4930568A12Rik	0	0	0.140797	0	0.0979729	0
Prss39	0	0	0	0	0	0
Cfc1	0	0	0	0	0	0
Prss40	0	0	0	0	0	0
1700101I19Rik	0	0	0	0	0	0
Amer3	0	0	0.382731	0	0	0
Arhgef4	0	0.754789	0	0	0	0
SMIM39	0	0	0	0	0	0
Gm38336	0.0631768	0	0	0	0	0
Fam168b	0.552879	1.07148	0.632843	0.624014	0.340642	0.623084
Plekhb2	0.0622986	0	0.360771	0.476874	0.800851	0.961955
Gm37068	0.0833909	0	0	0	0	0
Gm28415	0	0	0	0	0	0
1110002O04Rik	0	0	0	0	0	0
Gm37146	0	0	0	0	0	0
Gm33222	0	0	0	0	0	0
4930535G08Rik	0	0	0	0	0	0
Hs6st1	0.115868	0.443637	0.514357	0.147621	0	0.150339
Gm37335	0	0	0	0	0	0
Gm33280	0	0.271025	0	0	0	0
Uggt1	0.303677	0.301577	1.87555	0.391708	0.282982	0.587217
Neurl3	0.183276	0.218838	0	1.07988	0.0750818	1.60752
Arid5a	0.562134	0.388057	0.220104	0.482226	0.929146	1.24644
4930403P22Rik	0	0	0.15396	0	0	0
Kansl3	0.235143	0.119256	0.293376	0.0703742	0.463779	0.194944
Fer1l5	0	0	0	0	0.0979729	0
Lman2l	0.355162	0.579028	0.452071	0.0709265	0.899181	0.206071
Cnnm4	0.0331539	0.436072	0.253962	0.0262724	0	0.0545786
Cnnm3	0.0514123	0.469139	0.340118	0.117484	0	0.135963
Gm38033	0	0	0	0	0.104134	0
Ankrd23	0.0436752	0	0.151863	0	0	0.0545786
Ankrd39	0.351881	0	0.294568	0.0502068	0.103766	0
Sema4c	0.0649323	0	0	0	0	0.0742622
D430040D24Rik	0	0	0	0	0	0
Fam178b	0	0	0	0	0.0979729	0
Cox5b	2.60418	0.788742	2.02497	2.54177	2.66793	1.3635
Actr1b	0.41728	0.617201	0	0.539997	0.193692	0.130063
4933424G06Rik	0.0275906	0	0	0	0	0
Gm33533	0	0	0	0	0	0
Zap70	1.64498	1.262	0	0	3.20176	0
Tmem131	0.334827	1.66965	1.38267	0.783384	0.0478595	0.637618
Gm38115	0	0	0.0665619	0	0	0
Vwa3b	0	0.358307	0	0.0482697	0	0
Gm37020	0	0	0	0	0	0
Cnga3	0.0525352	0	0	0	0	0
Inpp4a	0.173115	0.47585	0.228308	0.598649	0	1.59495
4930439A04Rik	0	0	0	0	0	0
Coa5	0.157218	0	0.948355	0.245897	0.0979729	0.0669129
Unc50	0.467402	0.257012	0.490532	0.439986	1.04471	0.528803
Mgat4a	0.584493	1.00871	0.558996	0.17602	0.39691	0.711302
Cracdl	0.131221	0	0.13455	0	0.161991	0.0917387
4930556I23Rik	0.0400697	0	0	0	0	0
Tsga10	0	0	0	0.210857	0	0.170023
Gm26805	0	0	0	0	0	0
Lipt1	0.0136666	0	0	0	0	0
Mitd1	0.703971	0.456036	0.925881	0.219798	0.96278	0.426306
Mrpl30	1.35861	0.276032	0.367638	0.951517	1.10497	0.155186
Lyg2	0	0	0	0.0180633	0	0
Gm15457	0	0	0	0	0	0
Lyg1	0	0	0	0	0	0
Txndc9	0.783257	0.99324	0.511894	0.669264	0.696889	0.366249
Eif5b	1.43429	0.957565	1.23669	0.979878	0.928284	0.507575
Rev1	0.0985427	0.119256	0.257832	0.107431	0	0
Gm37062	0	0	0	0	0	0
Gm5099	0.00914589	0	0	0	0	0
Aff3	1.50566	5.57784	7.93054	0.285618	1.88178	0.357573
Gm16150	0	0	0	0	0	0
Gm16151	0	0	0	0	0	0
Gm16152	0	0	0	0	0	0
Lonrf2	0	0	0	0	0	0
Chst10	0.0433357	0.438904	0.0727852	0	0.299712	0.0317951
Gm37707	0	0	0	0	0	0
Nms	0	0	0	0	0	0
Pdcl3	0.482001	0	0.0740749	0.479996	0.382905	0.64505
Gm37821	0	0	0	0	0	0
Npas2	0.018216	0.358307	0	0	0	0
Rpl31	24.1179	4.97133	7.81528	11.6091	22.7844	6.62948
Tbc1d8	0.0136666	1.01859	0	0.782489	0	0.746824
Cnot11	0.110537	0.196367	0	0.163328	0	0.0746422
Gm15832	0.16192	0	0.251054	1.70738	0	1.21737
Rnf149	0.0900683	0.0679787	0.292783	1.90995	0	1.76379
Creg2	0	0	0	0.0197777	0	0
D930019O06Rik	0	0	0	0	0	0
Rfx8	0	0	0	0	0	0
Gm3646	0	0	0	0	0	0
1700066B17Rik	0	0	0	0	0	0
Map4k4	0.597277	1.36943	0.253962	0.469436	0.621845	1.31444
Il1r2	0.0273332	0	0.183066	2.20549	0	3.0474
Gm16894	0.00583724	0	0	0.0856055	0	0.0376393
Il1r1	0.0409997	0.357769	0	0	0	0
Il1rl2	0.0321062	0	0	0.0177619	0	0
Il1rl1	0	0.518726	0	0.0824844	0.435388	0.203103
Il18r1	0.042211	0	0.199533	0	0.323981	0
Il18rap	0.0897436	0.699766	0.382731	0.298459	0.293919	0.156766
Gm35801	0	0	0	0	0	0
Slc9a4	0	0	0	0.0589713	0	0.0446086
Slc9a2	0.0354918	0	0	0.0345066	0	0
Gm37623	0	0	0	0	0	0
Gm37915	0	0	0	0	0	0
Mfsd9	0	0.431332	0	0.0318537	0	0
Tmem182	0	0	0	0	0	0
4930448I06Rik	0	0	0	0	0	0
Gm28634	0	0	0	0	0	0
Gm29260	0	0.358307	0	0	0	0
Gm9915	0	0	0	0	0	0
Gm29664	0	0	0	0	0	0
Gm28175	0	0	0	0	0	0
Gm28140	0	0	0	0	0	0
Pantr1	0.0400697	0	0	0.0180633	0	0
Pou3f3	0	0	0	0	0	0
Gm20646	0.0182332	0	0	0.0108997	0	0.0478803
Pantr2	0	0	0	0	0	0
Dalir	0	0	0	0	0	0
Mrps9	0.98115	0.196367	0.228035	0.161493	0	0.484236
Gpr45	0	0	0	0.0328304	0	0
Tgfbrap1	0.158789	0	0.108859	0.0653142	0	0.355693
Gm28782	0	0	0	0	0	0
8430432A02Rik	0	0	0	0	0	0
AI597479	0	0	0	0.0177619	0	0.0478803
Fhl2	0.032679	0	0	0.023862	0.42107	0
Gm29040	0	0	0	0	0	0
Nck2	1.07984	0.903464	0.986571	0.0563672	0.340642	0.113978
Ecrg4	0	0	0	0	0	0
Gm29155	0	0	0	0	0	0.118053
Gm29157	0	0	0	0	0	0
Gm29156	0	0	0	0	0	0
Uxs1	0.0878776	0.36004	0.97322	0.384637	0.104134	0.233328
Tpp2	0.406102	0.38724	0.299291	0.702547	0.865847	0.820068
Mettl21c	0	0	0	0	0	0
Gm8251	0.0273498	0	0	0	0	0
Tex30	0.332043	0.196367	0.384084	0.16071	0.586525	0.0598788
Poglut2	0.248615	0.238513	0.394759	0	0.300327	0.0223043
Bivm	0.0861903	0.339752	0	0.00888093	0	0.0545786
Ercc5	0.439383	0.196367	0	0.12212	0.108847	0
Mettl21e	0	0	0	0	0	0
Gm28893	0	0	0	0	0	0
Gulp1	0.0546663	0.357769	0	0	0	0
4930521E06Rik	0	0	0	0	0	0
Col3a1	1.03832	2.42315	0	0	0	0
Col5a2	0.0546995	0.474835	0	0.173286	0	0
Wdr75	0.161004	0.304301	0	0.0390873	0.0750818	0
Slc40a1	0	0	0	0.29512	0	0.664553
Dnah7b	0.0888738	0	0	0.0117538	0.0979729	0
Dnah7c	0	0	0	0	0	0
Slc39a10	0.134721	0.426232	0	0.0281836	0	0.35192
Gm28151	0	0	0	0	0	0
Gm28826	0	0	0	0	0	0
C230029F24Rik	0	0	0	0	0	0
4933411E06Rik	0	0	0	0	0	0
Gm29665	0	0	0	0	0	0
Gm28321	0	0	0	0	0	0
Tmeff2	0.0546995	0.472646	0.140797	0	0	0
Gm28322	0	0	0	0	0	0
Gm28319	0	0	0	0	0	0
Gm28320	0	0	0	0	0	0
Gm29325	0	0	0	0	0	0
9330175M20Rik	0	0.629882	0	0.0108997	0	0
Cavin2	0.0182332	0.238513	0	0.0619072	0	0
1700072G22Rik	0	0	0	0	0	0
Nabp1	0.676292	0.254647	1.27691	0.759179	0.929616	1.06592
Gm17767	0	0.431332	0	0	0	0
Gm28055	0	0	0	0	0	0
Myo1b	0.102309	0.254647	0.0169863	0.0767643	0	0
Gm29453	0	0	0	0	0	0
Gm28323	0	0	0	0	0	0
Stat4	1.20899	1.98671	2.09754	0.200447	0.541599	0.211359
Gm31812	0	0	0	0	0	0
Stat1	2.19652	2.46935	1.08907	0.84405	1.7431	1.48143
Gls	0.459054	0.456036	1.49185	0.539952	0.0979729	0.536468
Nab1	0.369523	0.242111	0.689706	0.736344	0.974664	0.723304
Gm53065	0	0	0.447016	0	0	0
Gm28178	0	0	0	0	0	0
Nemp2	0.150275	0.464407	0	0.105286	0	0
Mfsd6	0.0883618	0.717115	0.176847	0.475399	0.317115	0.898546
Gm29670	0	0	0	0	0	0
Inpp1	0.514815	0	0	0.23822	0.816406	0.154321
Hibch	0.236745	0.119256	0	0.0679837	0	0.0223043
1700019D03Rik	0.0182332	0	0	0	0	0
Mstn	0	0	0	0	0	0
1700019A02Rik	0	0	0	0	0	0.0454256
Pms1	0.128493	0.349883	0.151863	0.200797	0	0
Gm28777	0	0	0	0	0	0
Ormdl1	0.110848	0.286816	0	0.218972	0.67575	0
Osgepl1	0.0655514	0	0	0.251222	0.42107	0
Asnsd1	0.349854	0.658573	0.390133	0.340893	0.377239	0.329181
Gm50478	0	0	0.0679879	0.0345066	0	0
Dnah7a	0.598533	4.28439	0.308711	0.0356125	0.368811	0.51301
Stk17b	2.15127	1.58476	5.27101	2.25645	2.14303	4.92841
Hecw2	0.0693008	0.0381746	0	0.0553902	0.0750818	0.074903
Ccdc150	0	0	0	0	0	0
Gtf3c3	0.158538	0	0	0.0990882	0	0
Gm34066	0	0	0	0	0	0
Pgap1	0.0379993	0.40318	0.875292	0.0555701	0	0
Ankrd44	1.53093	3.24653	5.96094	2.79031	0.75681	7.10284
4930444A19Rik	0.0207996	0.0381746	0	0	0.292783	0.0317951
Sf3b1	2.35723	3.54823	3.49797	2.4424	2.11473	4.2257
Coq10b	0.0698671	0.0381746	1.02231	0.818618	0.0979729	0.723397
Hspd1	1.50087	0.934079	0.532951	0.787764	1.81533	0.352773
Hspe1	3.89057	2.55611	1.46429	2.19566	2.21118	0.786094
Mob4	0.58027	0.957296	0.515855	0.53637	1.18038	0.508822
Rftn2	0.0409997	0	0.133124	0	0	0
Gm10561	0	0	0.0665619	0	0	0
Mars2	0.117451	0.369556	0.154233	0.00755221	0	0.0545786
Boll	0.0341898	0	0	0	0	0
Plcl1	0.287638	0	0.294568	0.748624	0.292783	0.877135
9130227L01Rik	0	0	0	0	0	0
1700003I22Rik	0	0	0	0	0	0
Gm28240	0	0	0	0	0	0
Hsfy2	0	0	0	0	0	0
Satb2	0.0349655	0.629882	0	0.0508937	0	0
9130024F11Rik	0.0554173	0.512033	0.154233	0.0619072	0	0
1700126A01Rik	0	0	0	0	0	0
BC055402	0	0	0	0	0	0
4930558J18Rik	0.0516935	0	0	0	0	0
1700066M21Rik	0.201727	0.0381746	0	0.261864	0	0
Tyw5	0.269967	0.264346	0.294568	0.0586609	0.27682	0
Maip1	0.184766	0.254647	0	0.141261	0.0478595	0
Spats2l	0.0141659	0.358307	0	0	0	0
Gm17234	0	0	0	0	0	0
Kctd18	0.108837	0.32438	1.14713	0.219007	0	0.0428471
Sgo2a	0.127046	0	0.384084	0	0	0
Aox1	0.0182332	0	0	0	0	0
Aox3	0	0.512033	0	0	0	0.0478803
Aox4	0.0321062	0	0	0	0	0
Gm15759	0	0	0	0	0	0
Aox2	0.0309489	0	0	0.0328304	0	0
Bzw1	1.37468	2.16883	1.32421	0.468066	1.79742	0.607051
Clk1	1.70159	2.15512	3.76469	0.955081	1.95645	2.51584
Ppil3	0.348898	0.426232	0.199533	0.0316439	0.248137	0.0972073
Nif3l1	0.0689927	0	0	0.0390837	0.996004	0.0599436
Orc2	0.245579	0.518726	0.0363926	0.441662	0.271829	0.228012
Gm15834	0.0353976	0	0.405824	0	0.292783	0
Fam126b	0.253809	0.850758	0.929353	0.137007	0.122941	0.844638
Ndufb3	1.50853	0.295187	0.692003	1.06803	1.0529	0.970902
Flacc1	0	0.612955	0.0164772	0	0	0
Cflar	0.965625	0	0.498724	1.37605	1.07767	0.500235
Casp8	0.6783	1.47184	0.760901	1.01135	0.797422	1.61586
Trak2	0.204199	0	0.917454	0.112547	0.201739	0.0478803
Stradb	0.209195	0.0679787	0.050959	0.0108997	0	0.106057
C2cd6	0	0	0.0363926	0.0345066	0	0
ENSMUSG00000047383	0	0	0	0	0	0
Gm29018	0	0	0	0	0	0
Tmem237	0.103464	0	0	0.0357924	0	0
G730003C15Rik	0	0	0	0	0	0
Mpp4	0	0	0	0	0.292783	0.0454256
Gm29017	0.0670124	0	0	0	0	0
Als2	0.0892315	0.721041	1.00627	0.00888093	0	0.166577
Cdk15	0	0	0	0.00755221	0	0
Gm29016	0	0	0	0	0	0
Fzd7	0	0	0	0.142977	0	0.149848
Gm26813	0	0	0	0	0	0
Gm973	0.0230135	0.119256	0	0.0269443	0	0
Gm28411	0	0	0	0	0	0
1700122D07Rik	0	0	0	0	0	0
Sumo1	2.04385	1.09761	0.750497	1.05627	3.1755	1.18943
Nop58	1.21417	1.69906	1.18422	0.292851	1.78122	0.193331
Bmpr2	0.0200031	0.750545	0.0370374	0.561793	0	1.03604
Fam117b	0.119096	0.0763493	0.140637	0.479444	0.369001	1.82176
Ica1l	0.00583724	0	0	0	0	0
Wdr12	0.466405	0.504051	1.72893	0.129924	0.458839	0.118871
Carf	5.80324	2.01988	2.87144	3.55702	6.27712	2.42584
Nbeal1	0.0811602	0.119256	0.39538	0.350368	0.0979729	0.185921
Cyp20a1	0.0368894	0	0.308193	0.0197806	0	0.0478803
Abi2	0.102202	0	0	0.0659987	0	0.194936
Raph1	0.370212	0	0.154966	0.790304	0.0979729	1.4611
Cd28	1.66211	1.8536	1.13282	0.106797	2.05525	0
Gm11579	0.0715283	0	0	0	0.104134	0
2310016D23Rik	0.0331539	0	0	0	0	0
Ctla4	0.757209	0.339752	1.15137	0.0356125	0.0750818	0.102726
Icos	0.378157	0	0	0.0302064	0.955036	0
Gm28083	0	0	0	0	0	0
Gm11587	0	0	0	0	0	0
9530026F06Rik	0	0	0	0	0	0
Gm11588	0	0.358307	0	0	0	0.0545786
Gm28449	0	0	0	0	0	0
4930587A21Rik	0	0	0	0	0	0
Pard3b	0.0769908	2.69541	3.0625	0.126826	0.103766	0
Pard3bos1	0	0	0	0	0	0
Pard3bos2	0	0	0	0	0	0
Pard3bos3	0	0	0	0	0	0
Gm29084	0	0	0	0	0	0
Nrp2	0.0609423	0.0381746	0.168849	0.267202	0	0.249047
Gm29083	0	0	0	0	0	0
Gm4208	0.281239	0	0	0	0	0
Ino80d	0.581115	0.721278	0.375908	0.473707	0	0.778594
Ino80dos	0.279878	0.0381746	0	0.290524	0.217694	0.0796754
Gm20342	0.156717	0	0	0.0545947	0.150139	0.0772207
Ndufs1	0.30955	1.12847	0.218425	0.159824	0.179216	0.074903
Eef1b2	7.13445	2.51764	4.60532	2.07295	5.88854	1.84826
Gpr1	0	0.512033	0	0	0	0
Platr12	0	0	0	0	0	0
Gm11608	0	0	0	0	0	0
Zdbf2	0	0	0	0	0	0
Adam23	0	0.254647	0	0	0	0
Gm39653	0	0	0	0	0	0
Dytn	0.0461212	0	0	0	0	0.0223043
Mdh1b	0.0321062	0	0	0	0	0
Fastkd2	0.270779	0	0	0.228061	0.42107	0.0317951
4933402D24Rik	0	0	0	0	0	0
Gm13749	0	0	0	0	0	0
Klf7	0.391059	0.0381746	0.875277	0.656577	0.731067	0.606076
Gm13748	0	0	0	0	0	0
Gm28981	0	0.358307	0	0.0140918	0	0.118053
Creb1	0.582063	1.80937	0.951328	0.415777	0.551769	1.14082
Mettl21a	0.187841	0	0	0.229592	0.0979729	0.0540994
Gm28982	0	0	0	0	0.0750818	0
Gm29152	0	0	0	0	0	0
2810408I11Rik	0.0437694	0.237857	0	0.30267	0.0478595	0.0752785
Ccnyl1	0.00914589	0	0	0.0445842	0	0.0540994
Fzd5	0.0230135	0	0	0	0	0
Plekhm3	0.0752004	0.653623	1.21841	1.51377	0	1.6491
Akr1cl	0	0	0	0	0.292783	0
Cryge	0	0	0	0	0	0
Crygd	0	0	0	0	0	0
Crygc	0	0	0	0	0	0
Crygb	0	0	0	0	0	0
Cryga	0	0	0	0	0	0
D630023F18Rik	0	0	0	0	0	0
Idh1	0.176701	0.512033	0.203964	0.954527	0	1.34006
Pikfyve	0.0688775	0.0679787	0.328892	0.422378	0	0.335539
Pth2r	0	0	0	0.0300723	0	0
Crygf	0	0	0	0	0	0
Map2	0.0331539	0	0	0	0.150164	0
Gm10558	0	0	0	0	0	0
Unc80	0.06992	0	0	0.0545947	0.108847	0
Rpe	0.303001	0.436072	0.302488	0.207679	0	0.0694344
Kansl1l	0.233321	0.589102	0.421121	0.124458	0.367865	0
Acadl	0.984446	0.255579	0.559235	0.537335	1.39171	0.325541
Myl1	0	0	0	0	0.450491	0
Lancl1	0.781878	0.672217	0.913385	0.0748756	1.10984	0.0863737
Cps1	0	0	0	0	0	0
Gm15668	0	0	0	0	0	0
Gm15669	0	0.349883	0	0	0	0
Gm15671	0	0	0	0	0	0
Erbb4	0.453151	0	0	0.0872193	0.151625	0.0991872
Gm16076	0.018757	0	0	0	0	0
Gm28497	0	0	0	0	0	0
Gm29113	0	0	0	0	0	0
Gm29114	0	0	0	0	0	0
Ikzf2	1.49365	0	0.661883	0.0813169	1.21779	0
Gm29112	0	0	0	0	0	0
Gm28112	0	0	0	0	0	0
Spag16	0.0467798	0	0.292783	0.108168	0.281902	0
Vwc2l	0	0	0	0	0	0
Bard1	0.314215	0	0	0	0.292783	0
Abca12	0	0	0	0	0	0
Atic	0.392738	0.598878	0.142063	0.305928	0.634052	0.0446086
Fn1	0.461362	1.89277	0.448528	2.90558	0	2.80057
Apol7d	0	0	0	0	0	0
Gm8883	0	0	0	0	0	0
Gm28818	0.00914589	0	0	0	0	0
4933417E11Rik	0	0	0	0	0	0.0317951
4930556G22Rik	0	0	0	0	0	0
Gm4319	0	0	0	0.0140918	0	0
Mreg	0	0	0	0	0	0
Pecr	0.0136666	0	0	0.0385806	0.104134	0.0540994
Tmem169	0	0	0	0.0619072	0	0.154321
Xrcc5	0.307272	0.218838	1.7461	0	0.183929	0
Marchf4	0	0	0	0	0	0.0500681
Smarcal1	0.109963	0.629332	0.384084	0.0197777	0.151994	0
Gm39662	0	0	0	0	0	0
Ankar	0	0	0	0	0	0
Rpl37a	47.8938	12.1824	21.4004	30.6128	53.126	16.6859
Igfbp2	0.127195	0.0679787	0	0	0	0
Igfbp5	1.69568	2.05698	0	0	0	0
1700027A15Rik	0	0	0	0.0262724	0	0
Tnp1	0	0	0	0	0	0
Gm29185	0	0	0.293376	0	0	0
Pinc	0	0	0	0	0	0
D530049I02Rik	0	0	0	0	0	0
C530043A13Rik	0	0	0	0	0	0
Gm29186	0	0	0	0	0	0
6030407O03Rik	0.128497	0	0.0169863	0	0	0
Gm29183	0.0182332	0	0	0	0	0
Tns1	0.334223	1.07331	0	1.08092	0	0.621129
Rufy4	0.0554287	0.629882	0.0665619	0.105916	0.150139	0.193442
Cxcr2	0.0668903	0	0	1.09967	0	4.72463
Cxcr1	0	0	0	0	0	0.896572
Arpc2	6.92434	6.51101	5.63368	13.009	6.90507	11.0866
Gpbar1	0	0	0	0	0	0
Aamp	1.59863	0.542225	0.935825	0.368539	1.2549	1.05389
Gm28364	0	0	0	0	0	0
Pnkd	0.948296	0.0381746	0	0.244119	0.788935	0.15651
Tmbim1	0.0863602	0.0381746	0.271952	0.53542	0.183929	0.624444
Gm29358	0	0	0	0	0	0
Catip	0	0	0	0.0276809	0	0
Slc11a1	0.0141659	0	0.253962	2.42839	0	1.66212
Ctdsp1	0.232601	0.0381746	0.644179	0.777128	0.0979729	0.77735
Vil1	0	0	0	0	0	0
Usp37	0.128441	0	0.151863	0.178828	0.108847	0.0545786
Cnot9	0.292344	0.196367	0	0.0390866	0.225221	0.243777
Plcd4	0	0	0	0	0	0
Zfp142	0.0896185	0	0	0.0619072	0	0.0223043
Bcs1l	0.234416	0.0679787	0.0727852	0	0	0.105304
Rnf25	0.153852	0	0	0.0838695	0.095719	0.27181
Stk36	0.034688	0	0	0	0	0.111222
Ttll4	0.139568	0	0.571012	0.0140918	0.0750818	0.162605
Cyp27a1	0.0465649	0.509295	0.0665619	0.73982	0	1.11294
Prkag3	0	0	0	0	0	0
Wnt6	0	0	0	0.0946511	0	0
Gm29539	0	0	0	0.0328304	0	0
Wnt10a	0	0	0	0	0	0
Gm16582	0	0	0	0	0	0
Cdk5r2	0	0	0	0	0	0
Fev	0	0	0	0	0	0
Cryba2	0	0	0	0	0	0
Cfap65	0	0	0	0	0	0
Gm15841	0	0	0	0	0	0
Ihh	0	0	0	0	0	0
Nhej1	0.157054	0.54009	0.841465	0.0140918	0	0.0317951
Slc23a3	0	0	0	0	0	0
Cnppd1	0.609362	0.135957	0.751849	1.03466	0.402817	0.786011
Retreg2	0.35272	0.0381746	0	0.509711	0.288063	0.262197
Zfand2b	0.991371	0.841012	0.320524	0.603186	0.173055	0.724765
Abcb6	0.0273619	0	0	0.0855227	0.223969	0
Atg9a	0.215754	0	0	0.266138	0	0.0223043
Ankzf1	0.190622	0.0679787	0.73509	0.060604	0.292783	0.118053
Glb1l	0.059945	0.196367	0	0.0357358	0	0
Stk16	0.420637	1.88859	1.1269	0.466232	0.654378	0.350575
Tuba4a	1.71219	0.905773	0.778204	0.587415	1.93909	0.34178
A630095N17Rik	0	0	0	0	0	0
Dnajb2	0.0795427	0.144328	0.423854	0.0276809	0.179216	0.403478
Ptprn	0	0	0	0	0.103766	0
Gm28294	0	0	0	0	0	0
Resp18	0	0	0	0	0	0
Gm28902	0	0	0	0	0	0
Dnpep	0.183774	0	0.108859	0.20202	0.312154	0.488582
Des	0	0	0	0	0	0
Gm15179	0	0	0	0	0	0
Speg	0	0	0	0	0	0
Gm15178	0	0	0	0	0	0
Gmppa	0.285848	0.271025	0.13455	0.238507	0.20985	0.0796754
Asic4	0	0	0.0157041	0	0	0
Chpf	0.0842599	0.218838	0	0	0.617016	0
Obsl1	0	0	0	0	0	0
Tmem198	0	0	0	0	0	0
Inha	0.0182332	0	0	0	0	0
Stk11ip	0.0283317	0.749138	0.190626	0	0	0.074903
Slc4a3	0	0	0	0	0	0
Gm29065	0	0	0	0	0	0
Gm29069	0	0.119256	0	0	0	0
Gm17751	0	0	0	0	0	0
Gm816	0	0	0	0.00888093	0	0
Epha4	0	1.34596	0	0.0690131	0	1.07656
Gm28386	0	0	0	0	0	0
Gm28387	0	0	0	0	0	0
Pax3	0.0516868	0	0	0	0	0
Sgpp2	0	0	0	0	0	0
Gm28410	0	0	0	0	0	0
Farsb	0.401389	0.0763493	0.104381	0.086365	0.312034	0.0545786
BC035947	0	0	0	0	0	0
Mogat1	0.129076	0	0	0	0	0
5730419F03Rik	7.29333	46.0176	10.5184	5.2188	5.55203	4.61802
Gm29611	0	0	0	0	0	0
Acsl3	0.127738	0.349883	0	0.0593987	0.292783	0.149485
Utp14b	0.0554287	0	0	0.0248927	0	0.0454256
Gm29536	1.29776	1.67073	0.0679879	0.130072	0.542381	0.122309
Kcne4	0	0	0	0	0	0
Gm29187	0	0	0	0	0	0
Scg2	0	0	0	0	0	0
Ap1s3	0.0984406	0	0.784118	0.169408	0.271028	0
Wdfy1	0.0364663	0	0.594878	0.399762	0	0.145829
Mrpl44	0.315183	0.0381746	0.51971	0.152476	0.282982	0.186164
Serpine2	0	0	0.108859	0.128321	0	0
9830004L10Rik	0.0321062	0	0	0	0	0
Fam124b	0.014233	0	0	0	0	0
2310015K22Rik	0	0	0	0	0	0
Cul3	0.263416	1.21687	1.25914	0.328596	0.104134	0.780328
Gm29125	0	0	0	0	0	0
1700016L21Rik	0.109399	0	0	0	0	0
Gm45261	0	0	0	0	0	0
Dock10	1.53484	7.57308	5.13322	2.8094	2.36516	4.14364
Nyap2	0	0	0	0.0117538	0	0.0376393
Irs1	0	0.629882	0	0	0.108847	0
Gm9747	0	0	0	0	0	0
Rhbdd1	0.116328	0.301577	0	0.197775	0.103766	0.330626
Gm28940	0	0	0	0	0	0
Col4a4	0	2.14661	0	0	0	0
Col4a3	0	0.477025	0	0	0	0
C430014B12Rik	0	0	0	0	0	0
Mff	0.665038	0.324991	0.168849	0.343716	0.478737	0.957168
Gm28941	0	0	0	0	0	0
Tm4sf20	0	0	0	0	0	0
Gm47791	0	0	0	0	0	0
Gm28942	0	0	0	0	0	0
Agfg1	0.185938	0.347374	0.263092	0.155159	0.231788	0.315526
A030005L19Rik	0	0	0	0.0604127	0	0
A030014E15Rik	0	0	0	0	0	0
Gm6217	0	0	0	0	0	0
A030003K21Rik	0	0	0	0	0	0
Gm7544	0	0	0	0	0	0
Gm47955	0	0	0	0	0	0
Gm47959	0	0	0	0	0	0
Slc19a3	0	0	0	0	0	0
Krtap28-10	0	0	0	0	0	0
Gm47969	0	0	0	0	0	0
A030005K14Rik	0	0	0	0	0	0
Krtap28-13	0	0	0	0	0	0
Ccl20	0	0	0	0	0	0
Daw1	0	0	0	0	0	0
Sphkap	0	0	0	0	0	0
4933436I20Rik	0	0	0	0	0	0
Pid1	0.526048	0.629882	0	4.61958	0	5.18438
Dner	0.154817	0.512033	0	0	0	0
Trip12	0.454887	2.5644	1.4853	0.999538	0.484207	1.15828
Fbxo36	0.025442	0	0	0.0345066	0	0.27388
Slc16a14	0.0283317	0	0	0.0482697	0	0
Gm15433	0	0	0	0	0	0.074903
C130026I21Rik	0.170762	0.577273	1.96231	1.23082	0.390756	0.66687
Gm7582	0	0	0	0	0	0
A530032D15Rik	0.0400697	0.0381746	0.146215	0	0	0
Gm10553	0.014233	0	0	0	0.0979729	0
A530040E14Rik	0.018757	0	0	0.0197777	0	0.0428471
Gm7609	0	0	0	0	0.0979729	0
Gm16028	0	0	0	0	0	0
Gm2619	0	0	0	0	0	0
Gm16025	0	0	0	0	0	0
Gm52955	0	0	0	0	0	0
Gm16092	0	0	0	0	0	0
Gm7592	0	0	0	0	0	0
G530012D18Rik	0	0	0	0	0	0
Sp110	1.53749	1.80438	1.41654	0.681028	1.6252	1.94056
Gm16094	0	0	0	0	0	0
Sp140	0.512772	0.55131	1.50058	1.11852	0.195946	0.438312
Gm10552	0.0588268	0.0679787	0.0679879	0	0.0979729	0
Gm17017	0	0	0	0	0	0
Sp100	2.29306	1.21175	4.61363	1.58202	3.47537	2.10561
A630001G21Rik	0.0883178	0.853641	2.19222	0.528163	0.542856	0.976842
9930111H07Rik	0	0	0	0	0	0
Cab39	0.624548	0.562238	2.62606	0.800179	1.02163	1.1432
Itm2c	1.03762	2.2871	1.18122	1.50136	2.72858	1.42087
4933407L21Rik	0	0	0	0	0	0
Gm28884	0	0	0	0	0	0
Gpr55	0	0	0.0370374	0	0.300327	0
Gm28100	0	0	0	0.0903166	0	0
Spata3	0	0	0	0	0	0
2810459M11Rik	0.0331704	0.0679787	0	0	0.971943	0
Psmd1	0.682491	0.732211	0.87464	0.418259	0.462268	0.245727
Htr2b	0	0	0	0	0	0
Armc9	0.122226	0.877033	0	0.217082	0	0
Gm16341	0	0	0.207359	0	0.150164	0
B3gnt7	0	0	0	0.00755221	0	0
Gm28626	0	0	0	0	0	0
Ncl	3.45927	1.30494	1.60779	1.71522	4.4257	0.636396
C130036L24Rik	0.0437807	0	0	0	0	0.0478803
Nmur1	0	0	0	0	0	0
Tex44	0	0	0	0	0	0
Ptma	30.3866	9.4858	9.38557	15.2233	27.9723	7.44753
Pde6d	0.33572	0.603154	0.359222	0.190196	0.367858	0.112281
Cops7b	0.205581	0.58774	0.766653	0.0965549	0	0.159225
Nppc	0	0	0	0	0	0
Dis3l2	0.0620949	0.73504	2.54411	0.218481	0.696826	0.275269
Gm29055	0	0	0	0	0	0
Gm28375	0	0.358307	0	0.0108997	0	0
Gm29371	0	0	0	0	0	0
Alppl2	0	0	0	0	0	0
Alpi	0	0	0	0	0	0
Akp3	0	0	0	0	0	0
Gm29374	0	0	0	0	0	0
Ecel1	0	0	0	0	0	0
Prss56	0	0	0	0	0	0
Chrnd	0	0	0	0	0	0
Chrng	0	0	0	0	0	0
Eif4e2	0.731325	0.388057	0.491646	0.97373	0.467863	0.34776
Efhd1	0.0911658	1.02849	0	0	0	0
Efhd1os	0	0	0	0	0	0
Gigyf2	0.633173	0.558922	0.822432	0.438384	0.819768	0.247273
Kcnj13	0	0	0	0	0	0
Snorc	0	0	0	0	0	0
Ngef	0.0420654	0	0	0.0240917	0	0
Neu2	0	0.629882	0	0	0	0
Inpp5d	0.410765	0.513499	2.32567	3.73483	0.685557	4.10362
Atg16l1	0.341832	0	1.09959	0.528254	0.0750818	0.586921
Sag	0.0526358	0	0.382541	0.0791108	0	0.380638
Dgkd	1.12038	1.15977	3.74204	0.563565	0.351877	0.452491
Gm19582	0	0	0	0	0	0
Usp40	0.221106	0.349883	0.225861	0.0510032	0	0.494494
Ugt1a10	0.0425644	0	0	0.24256	0	0.837352
Gm20528	0.0230135	0	0	0	0	0
Ugt1a9	0.156513	0	0.253962	0.352651	0	0.981464
Ugt1a8	0	0	0	0.0621635	0	0.651108
Ugt1a7c	0.0240704	0	0	0.0668859	0	0.114457
Ugt1a6b	0.0141659	0	0	0.0863697	0	0.433364
Ugt1a6a	0	0	0	0.0550991	0	0.249815
Ugt1a5	0	0	0	0.203602	0	0
Ugt1a2	0	0	0	0.0345066	0	0.242594
Dnajb3	0.0230135	0	0	0	0	0
Ugt1a1	0	0	0	0	0	0
Mroh2a	0	0	0	0.00755221	0	0
Hjurp	1.25445	0.349883	1.44832	0.268511	1.86517	1.57093
Trpm8	0.014233	0	0	0	0	0
4930453O03Rik	0	0	0	0	0	0
Spp2	0	0	0	0	0	0
Gm29538	0.0230135	0	0	0	0	0
Gm28888	0	0	0	0	0	0
Glrp1	0	0	0	0	0	0
Gm19589	0	0	0	0	0	0
Gm29336	0	0	0	0	0	0
Arl4c	1.13708	1.10533	0.599251	1.39761	0.475606	0.89976
Platr5	0	0	0	0	0	0
Gm29337	0.0149831	0	0	0	0	0
1700067G17Rik	0	0	0	0	0	0
Sh3bp4	0.0400697	0	0	0.0240917	0	0
Gm28342	0	0	0	0	0	0
C030007H22Rik	0	0	0	0.136485	0	0
Agap1	0.147008	7.43316	0	0.51433	0.0750818	0.367021
Gm28499	0	0	0	0	0	0
4933400F21Rik	0	0	0	0	0	0
Gbx2	0	0	0	0	0	0
D130058E05Rik	0	0	0	0	0	0
Asb18	0.0400697	0	0	0	0	0
Iqca	0	0.358307	0	0	0	0
4930434B07Rik	0	0	0	0	0	0
Ackr3	0.784026	2.13683	0	0.0845509	0	0
Gm28721	0	0	0	0	0	0
Gm28723	0	0	0	0	0	0
Gm28722	0	0	0	0	0	0
Cops8	0.687631	1.65022	0.841906	0.298286	0.754759	0.363529
Gm9991	0	0	0	0	0	0
Col6a3	0.0182332	1.8115	0	0.0376291	0	0
Mlph	0	0	0	0	0	0
Prlh	0	0	0	0	0	0
Rab17	0	0	0	0	0	0
Gm28199	0	0	0	0	0	0
Lrrfip1	0.735524	1.47251	1.25371	1.95351	2.40896	2.80364
Rbm44	0	0	0	0	0	0
Ramp1	3.90339	1.19652	0.199533	1.44274	2.56643	0.555423
Ube2f	0.38223	0	0.0370374	0.909209	1.04014	0.85808
Scly	0.0288507	0.276032	0.329768	0.227597	0.364098	0.52629
Gm17090	0	0	0	0	0	0
Espnl	0	0	0	0	0	0
Klhl30	0	0	0	0	0	0
Erfe	0	0	0	0	0	0
Ilkap	0.719347	0.434225	0.548719	0.127076	0.245883	0.475439
1700020N18Rik	0	0	0	0	0	0
Hes6	0.926932	0.982322	0.308545	0.207845	0.151994	0.0598788
Per2	0	0	0	0	0	0
Gm28382	0	0	0	0	0	0
Traf3ip1	0.161796	0.431332	0.689421	0.0256155	0	0
Asb1	0	0	0	0.023862	0.0750818	0.246419
Gm28380	0.0141659	0	0	0	0	0
Gm29100	0	0	0	0	0	0
Twist2	0	0	0	0	0	0
Gm29101	0	0	0	0	0	0
Hdac4	0.549495	0.301577	0	0.481538	0.427328	0.705524
Gm29099	0	0	0	0	0	0
Ndufa10	1.33505	2.32052	0.393954	0.299638	1.80937	0.81001
Olfr1416	0	0	0	0	0	0
Olfr1415	0	0	0	0	0	0
Olfr1414	0	0	0	0	0	0
Olfr1413	0	0	0	0	0	0
1700054K02Rik	0	0	0	0	0	0
Olfr1412	0	0	0	0	0	0
Olfr1411	0	0	0	0	0	0
Olfr1410	0	0	0	0	0	0
Olfr12	0	0	0	0	0	0
Cops9	1.70789	0.165365	0.567493	1.61346	2.40289	0.908761
Otos	0	0	0	0	0	0
Gm29483	0	0	0	0	0	0
Gm29482	0	0	0	0	0	0
Gm29481	0	0	0	0	0	0
Gpc1	0.0400697	0.358307	0	0	0	0
Gm29480	0	0.358307	0	0	0	0
Ankmy1	0	0	0	0	0	0
Dusp28	0.0834683	0	0	0.349091	0	0
5033417F24Rik	0	0.119256	0	0	0	0
Rnpepl1	0.0200031	0.436072	0.753351	0.33953	0.217694	0.566441
9430060I03Rik	0	0	0.589136	0	0.0478595	0.0376393
Capn10	0.109215	0	0.382731	0.0117538	0.104134	0.0900342
Gpr35	0	0	0	0.448181	0	0.754986
Aqp12	0	0.512033	0	0	0	0.113156
Kif1a	0	0	0	0.0619072	0	0
Gm28086	0	0	0	0	0	0
Agxt	0	0	0	0.0262724	0	0
Mab21l4	0	0	0	0	0	0
Crocc2	0	0	0	0	0	0
Sned1	0.0585524	0	0.0363926	0	0	0
Mterf4	0.0933463	0.0381746	0	0.0300723	0.122941	0
Gm28535	0	0	0	0	0	0
Pask	0.110857	0	0	0	0	0
Ppp1r7	0.316238	0.0763493	0.0665619	0.311006	0.432041	0.138608
Ano7	0	0	0	0	0	0
Hdlbp	0.358665	0.948663	0	0.401015	0.145832	0.676351
Septin2	0.26508	0.119256	0.1889	0.338482	0.0478595	0.203905
Septin2.1	0.240958	0.119256	0.0363926	0.366742	0.505396	0.225944
Farp2	0.0230135	0	0	0	0	0.0822479
Stk25	0.604965	0.809322	0.373692	0.314508	0.358445	0.358775
Gm28536	0	0	0	0	0	0
Bok	0	0	0	0	0	0
Thap4	0.117821	0.0381746	0.382731	0.103442	0.0750818	0.0772207
Gm10550	0.0233117	0	0	0.0922238	0	0
Atg4b	0.598644	0.106153	0.0740749	0.298634	0.46893	0.0742622
Dtymk	1.15381	0.22541	0.399858	0.304362	1.09822	0.155765
Ing5	0.0494493	0.0381746	0.479823	0.242133	0	0.122309
D2hgdh	0.0182332	1.86292	0.154233	0.0108997	0.0750818	0.0974257
Gal3st2	0	0	0	0.00755221	0	0
Gal3st2b	0.0141659	0	0	0	0	0
Gal3st2c	0	0	0	0	0	0
Neu4	0	0	0	0	0	0
Pdcd1	0.191571	0	0	0	0.976064	0
4930440C22Rik	0	0	0	0	0	0
Fam174a	0.224009	0.292822	0.225861	1.11728	0.345919	0.962895
St8sia4	0.723301	0.196367	1.26589	2.46077	0.0979729	0.978088
4930598F16Rik	0	0	0	0	0	0
1700063A18Rik	0	0	0	0.0345066	0	0
Gm29601	0	0	0	0	0	0
4930533P14Rik	0	0	0	0	0	0
Slco4c1	0	0	0	0.9359	0	0
Panct2	0	0	0	0.106797	0	0
Gm28901	0	0	0	0	0	0
Slco6c1	0	0	0	0	0	0
Macir	0.018757	0.0381746	0.0363926	0.818285	0.193692	1.09275
Ppip5k2	0.147459	0.802117	0.0363926	0.164968	0.0750818	0.321136
Gin1	0.278379	0	0.190997	0.277778	0	0.275769
Pam	2.85164	4.31575	0.725322	2.51202	1.84881	1.18396
B230216N24Rik	0.00583724	0.357769	0	0.0563447	0	0
1810006J02Rik	0.0237663	0	0	0	0.0750818	0
Gm29461	0	0	0	0	0	0
Slco6d1	0	0	0	0	0	0
Gm7967	0	0	0	0	0	0
Cntnap5b	0	0.358307	0.0169863	0.139627	0	0.370828
Gm20268	0	0	0	0	0	0
Gm28187	0	0	0	0	0	0
Cdh20	0.018757	0	0.0164772	0	0	0
Gm15699	0	0	0	0	0	0
Gm29012	0	0	0	0	0	0
Rnf152	0	0	0	0.0108997	0	0.0540994
Gm17634	0	0	0	0	0	0
Gm28403	0.0804136	0	0.0370374	0	0	0.0478803
Pign	0.204404	0.732486	0.676719	0.291498	0	0.390194
Gm28404	0	0	0	0	0	0
Relch	0.44463	1.60101	1.86499	0.656476	0.473567	1.32067
Tnfrsf11a	0.0374776	0.49097	0	0.726649	0	0.209428
Gm7160	0.0565058	0.218838	0	0	0	0.306517
Zcchc2	0.0417705	0.339752	0.183066	0.309855	0.179216	0.370391
Gm20753	0	0	0	0	0	0
Phlpp1	0.0546995	0.187235	0.961492	0.613612	0	1.69214
A530053M12Rik	0	0	0	0	0	0
Bcl2	2.58302	1.9582	6.05079	1.47749	1.31111	1.25826
D630008O14Rik	0	0.0679787	0	0	0	0
Kdsr	0.132536	1.86194	0	0.0719862	0.40163	0
Vps4b	0.796414	0.834285	1.076	0.751766	0.566231	0.706244
Serpinb5	0.121798	0	0	0	0.671908	0
Serpinb12	0	0	0	0	0	0
Serpinb13	0	0	0	0	0	0
Serpinb3a	0	0	0	0	0	0
Serpinb3d	0	0	0	0	0	0
Serpinb3b	0	0	0	0	0	0
Serpinb3c	0	0	0	0	0	0
Serpinb11	0	0	0	0	0	0
Gm15391	0	0	0	0	0	0
Serpinb7	0	0	0	0	0	0
Serpinb2	0	0	0	0.542625	0	0
Serpinb8	0	0	0	0.28156	0	0.152607
Gm15389	0	0	0	0	0	0
D830032E09Rik	0	0	0	0	0	0
Cdh7	0.0461212	0	0	0.0240917	0	0
Cdh19	0	0.629882	0	0	0	0
Gm29088	0	0	0	0	0	0
Dsel	0	0	0	0.0853055	0	0
Gm28189	0	0	0	0	0	0
9330185C12Rik	0	0	0	0	0	0
Cntnap5a	0	0.106153	0.0363926	0.0197777	0	0
Gm19965	0	0	0	0	0	0
Zfp813-ps	0	0	0	0	0	0
Gm28363	0	0.254647	0	0	0	0
B020011L13Rik	0	0	0	0	0	0
Gm28360	0	0	0	0	0	0
Gm28168	0	0	0	0	0	0
Gm7145	0	0	0	0	0	0
Gm29106	0	0	0	0	0	0
Tsn	1.02963	0.816545	1.31841	0.869964	1.07543	0.706196
Nifk	0.540793	0.119256	0.0370374	0.310757	0.0750818	0.0454256
Gm28867	0	0	0	0	0	0
Clasp1	0.163402	0.144328	1.18638	0.684216	0.396917	0
2900060B14Rik	0.0631768	0	0	0	0	0.0752785
Tfcp2l1	0	0	0	0	0	0
Gli2	0	0	0	0.0262724	0	0
Gm26831	0	0	0	0	0	0
Gm29456	0	0	0	0	0	0
Gm29455	0	0	0	0	0	0
Inhbb	0.0230135	0	0	0	0	0
Ralb	0.156297	0.119256	0	0.830494	0.095719	1.00431
Gm27184	0	0	0.294568	0	0	0
Tmem185b	0.260719	0	0.408195	0.421738	0.108847	0.299025
3830432H09Rik	0	0	0	0	0	0
Epb41l5	0	0	0	0	0	0
Ptpn4	0.208029	0.923837	0.927191	0.342487	0.248137	0
Gm28209	0	0	0	0	0	0
Tmem177	0.0998431	0	0	0	0	0
Cfap221	0	0.32438	0	0	0	0.0223043
Sctr	0	0.988189	0	0	0	0
Tmem37	0.113327	0	0	1.38012	0.104134	1.17184
Dbi	2.35444	0.604098	0.218682	2.84548	2.5904	3.50681
3110009E18Rik	0.336489	0.339003	0.0370374	0.0197806	0.0478595	0.127556
Steap3	0.0803002	0	0	0.0957716	0.0750818	0.233579
C1ql2	0	0	0	0	0	0
1700012E03Rik	0	0	0	0	0	0
Marco	0	0	0	0	0	0
En1	0	0	0	0	0	0
2610027F03Rik	0	0	0	0	0	0
Gm29346	0	0	0	0	0	0
Gm29345	0	0	0	0	0	0
Gm29348	0	0	0	0	0	0
Gm29347	0	0	0	0	0	0
Celrr	0	0	0.199533	0	0	0
Gm29359	0	0	0	0	0	0
Insig2	0.271969	0.713572	0.641532	0.22399	0.371841	0.111222
2210011K15Rik	0	0	0	0	0	0
Ccdc93	0.15441	0	0	0.217607	0.390756	0.0446086
Gm15392	0	0	0	0	0	0
Htr5b	0	0	0	0	0	0
Ddx18	0.968105	1.41246	1.70525	0.474449	2.0833	0.568098
Gm28590	0	0	0	0	0	0
Dpp10	0.190974	0	0.0363926	0.107238	0	0
1700121L03Rik	0	0	0	0	0	0
Actr3	3.04263	4.65258	3.7783	6.33007	6.80597	4.69057
Gm28706	0	0	0	0	0	0
Slc35f5	0.0141659	0	0	0.759125	0.225246	0.210968
Gpr39	0.0350591	0	0	0	0	0
Lypd1	0	0	0	0	0	0
Nckap5	0.108221	0.659885	0.0339727	0.0140918	0	0
4930599A14Rik	0	0	0	0	0	0
Mgat5	0.649065	2.70663	1.92359	0.521136	0.558908	0.218262
Tmem163	0.042591	0.174132	1.9726	0	0.104134	0
Acmsd	0	0	0	0	0	0
2900009J06Rik	0.0136666	0	0	0	0	0
Ccnt2	0.822844	0.864758	2.8429	0.615085	0.856403	0.694893
Map3k19	0.018446	0.0381746	0.555322	0.28999	0	0
Rab3gap1	0.308089	0.892042	0.626483	0.276834	0.42107	0.170772
Zranb3	0.0404251	0.74989	0	0.125361	1.00664	0
Gm28800	0	0	0	0	0	0
R3hdm1	0.489207	0.727809	0.850575	0.395817	0.415724	1.03791
Ubxn4	1.05425	1.39493	1.32127	0.781277	1.80191	1.43326
Lct	0	0	0	0	0	0
Mcm6	0.96402	0.254647	0.505356	0.123801	1.28828	0
Dars	0.761142	0.272716	0.549564	0.113184	1.22669	0.291345
Cxcr4	0.941297	0.0679787	0.713803	1.49909	1.30719	2.58486
Gm26686	0	0	0	0	0	0
Thsd7b	0.0341898	0	0	0.023862	0	0
Gm16081	0	0	0	0	0	0
Cd55b	0.0182332	0.388057	0.0363926	0	0	0
Cd55os	0	0	0	0	0	0
Gm15675	0	0.57056	0.208785	0.0302064	0	0
Cd55	0.289842	0.348264	0.784997	0	0	0.0500681
Gm16083	0.0695179	0	0	0	0	0.0500681
Zp3r	0	0	0	0	0	0
C4bp	0	0	0	0	0	0
Pfkfb2	0.0820493	0	0.183066	0.10278	0	0
Yod1	0.153784	0	0.0363926	0	0	0.0877074
AA986860	0	0	0	0	0	0
Gm28857	0	0	0	0	0	0
Gm28856	0	0	0	0	0	0
Fcamr	0	0	0	0	0	0
Gm15848	0	0	0	0	0	0
Pigr	0	0	0	0	0	0
Fcmr	0.018757	0.462788	1.1083	0	0	0
Il24	0	0	0	0	0	0
Il20	0	0	0	0	0	0
Il19	0	0	0	0	0	0
Il10	0.162708	0	0	0.10682	0.161991	0
Mapkapk2	0.333898	0.119256	0.170942	1.41079	0.150139	2.26665
Dyrk3	0.0273332	0	0.135976	0	0.108847	0.0446086
Eif2d	0.353164	0.545488	0	0.0621469	0.260841	0.0223043
Rassf5	1.25145	1.31147	0.614559	1.37906	0.95045	1.13843
Ikbke	0.451871	0.56872	0.183066	0.323317	0.864621	0
Gm28914	0	0	0	0	0	0
Gm28913	0	0	0	0	0	0
Srgap2	0.364248	0.234542	0.612693	1.54572	0.212613	2.3914
Gm29488	0	0	0	0	0	0
Fam72a	0.104167	0	0	0	0	0
Avpr1b	0	0	0	0	0	0
Ctse	0.358356	2.19378	1.43561	0.0938397	1.54379	0.460054
Rab7b	0.0597488	0	0.292783	1.93692	0.104134	0.531932
Slc26a9	0	0	0	0	0	0
Pm20d1	0	0	0	0	0	0
Slc41a1	0.153701	0.236323	0.0740749	0	0.202107	0.119758
Rab29	0.278973	0.119256	0	0.473531	0.145832	1.20795
Nucks1	1.45972	0.114524	0.78725	0.480995	0.662751	1.56575
Slc45a3	0	0	0	0	0	0
Elk4	0.633765	0.40073	1.20374	0.299898	0.401623	0.42876
Mfsd4a	0.0382609	0	0	0	0.195946	0
Cdk18	0	0	0	0	0	0.0478803
Gm29629	0	0	0	0	0	0
Lemd1	0.0283988	0	0	0	0	0
Gm29695	0	0	0	0	0	0
Gm10188	0	0	0	0	0	0
Gm29630	0	0	0	0	0	0
Klhdc8a	0	0	0	0	0	0
Nuak2	0.128884	0	0.434646	0.66411	0	0.724847
F730311O21Rik	0.0182332	0	0.740984	0	0	0
Tmcc2	0	0	0	0.0356125	0	0.0545786
Gm15849	0	0	0	0	0	0
Dstyk	0.0873594	0	0	0.232947	0.108847	0.363659
6030442K20Rik	0	0	0	0	0	0
Rbbp5	0.0967418	0.119256	0.0665619	0.0743724	0	0.670221
Tmem81	0.018216	0	0.0370374	0.0634695	0	0.0428471
Cntn2	0	0.518726	0	0	0	0
Nfasc	0.224915	0.60453	1.35194	0.0171786	0.122941	0
Gm10538	0	0	0	0	0	0
Lrrn2	0	0	0	0	0	0
Mdm4	0.64606	0.866739	1.02409	0.435075	0.270838	0.833717
Pik3c2b	0.0554287	0.157431	0.629021	0.00888093	0	0.0500681
Gm28609	0	0	0	0	0	0
Ppp1r15b	0.297823	0.655148	0.583934	1.06916	0	0.429986
Plekha6	0	0.358307	0	0.0469222	0	0.783576
Gm19461	0	0	0	0	0	0
Gm28040	0	0	0	0	0	0
Kiss1	0	0	0	0	0	0
Ren1	0	0	0	0	0	0
Etnk2	0	0	0	0	0	0
Sox13	0	0	0	0	0	0
Snrpe	2.96338	0.152699	0.182934	1.19449	2.23132	0.722675
Zc3h11a	0.559227	1.34844	0.592869	0.599532	0.0979729	0.625718
Zc3h11a.1	0.470413	1.95055	0.388512	0.724532	0	0.474486
Lax1	0.205286	0	0.656653	0	0.225246	0
Atp2b4	0.171858	0.393754	0.523529	0.0472509	0.259963	0.0975828
Gm28441	0	0	0	0	0	0
Optc	0	0	0	0	0	0
Gm15851	0	0	0	0	0	0
Prelp	0	0.472646	0	0	0	0
Gm1627	0.0295603	0	0	0	0	0.0223043
Fmod	0	0	0	0	0	0
Btg2	4.41361	1.83454	2.80189	5.97093	6.61955	6.44742
Chit1	0	0	0	0	0	0
Chil1	0	0	0	0.211858	0	2.97718
Mybph	0	0	0	0	0	0
Adora1	0	0	0	0	0	0
Myog	0	0	0	0	0	0
Ppfia4	0.0230135	0.512033	0.292783	0.273969	0	0.241697
Tmem183a	0.0723825	0.507314	0.290999	0.215309	0.161991	0.0545786
Mgat4f	0	0	0	0	0	0
Cyb5r1	0.139448	0.237857	0	0.430663	0.195946	1.24097
Adipor1	0.933208	0.483111	0.802313	2.70658	0.328103	3.79382
Platr1	0	0	0	0	0	0
Klhl12	0.0706975	0.357114	0.44662	0.00888093	0.475187	0
Rabif	0.275875	0	0	0.158675	0.888565	0.374859
Mgat4e	0	0	0	0	0	0
Kdm5b	0.460189	0	0.499529	0.0782366	0.582008	0.225107
Gm26783	0	0	0	0	0	0
Syt2	0	0	0	0	0	0
Ppp1r12b	0.204213	0.531335	1.06368	0.335076	0	0.0500681
Gm28892	0	0	0	0	0	0
Ube2t	0.303777	0.196367	0.15396	0.0117538	0.095719	0
Lgr6	0	0	0	0.00888093	0	0
Gm10535	0	0	0	0	0	0
Ptpn7	0.608539	2.2988	0.36113	0.313347	0.734611	0.0223043
Arl8a	0.210137	0.0763493	0.0363926	0.601257	0.0478595	0.421504
Gm15445	0.0207996	0	0.151863	0.0601446	0	0.074903
Gpr37l1	0	0	0	0	0	0
Gm26642	0	0	0	0	0	0
Elf3	0	0	0	0	0	0
Rnpep	0.287943	0.739252	0	2.12363	0.780958	2.10701
Timm17a	0.598489	0	0.0169863	0.103171	0.393969	0.192315
Lmod1	0	0	0	0	0	0
Shisa4	0	0	0	0	0	0
Ipo9	0.266893	0.840853	0.382731	0.123201	0	0.168209
Gm28277	0	0	0	0	0	0
Nav1	0.104274	0.119256	0.151863	1.91152	0.095719	2.43674
Gm4793	0	0	0	0	0	0
Csrp1	0.524396	0.315624	0.761452	0.374643	1.06854	0.128367
Phlda3	0.0546995	0.119256	0	0.115768	0	0
Tnni1	0	0	0	0	0.8259	0
Lad1	0.251334	0	0	0	0	0
Tnnt2	0	0	0	0	0	0
Pkp1	0	0	0.199544	0.119299	0	0
Igfn1	0.0516868	0.358307	0	0	0	0
Tmem9	0.45764	0.330236	0	0	0.122941	0
Ascl5	0	0	0	0	0	0
Cacna1s	0	0	0.14686	0	0	0
Gm37759	0	0	0	0	0	0
Gm15850	0	0	0	0	0	0
Kif21b	0.357215	1.24059	2.18642	0.27336	0.201739	0.344467
Mroh3	0	0	0	0	0	0
Inava	0	0	0	0	0	0
Gm26568	0	0	0	0	0	0
A430034D21Rik	0.00583724	0	0	0	0	0
Gm37552	0	0	0	0	0.150139	0
Gm26781	0.0506525	0	0	0	0	0
Gpr25	0	0	0	0	0	0
Camsap2	0.0207996	0.512033	0.140797	0.339416	0	0.130128
9230116N13Rik	0.106634	0	0.0363926	0	0	0
Ddx59	0.13336	0	0.253962	0.322815	0.0750818	0.32076
Kif14	0.00914589	0.196367	0.507924	0	0.612508	0
Gm37799	0.0136666	0	0	0	0	0
Gm33994	0	0.271025	0	0	0	0
4933409D19Rik	0	0	0	0	0	0
Platr23	0	0	0	0	0	0
Zfp281	0.3925	0.499311	0.183066	0.210121	0.150164	0.163726
Gm19705	0.1755	0	0	0	0	0.111222
Platr22	0	0	0	0	0	0
Nr5a2	0	0	0	0	0	0
Gm4258	3.1594	5.23264	6.56612	0.215396	0.493227	0.150666
Gm26979	0	0	0	0	0	0
Gm26936	0	0	0	0	0	0
Gm26930	0.0516868	0	0	0	0	0
Mir181a-1hg	0	0	0	0	0	0
Ptprc	5.03272	6.67352	8.31596	8.60644	2.06598	13.5707
Gm28556	0	0	0	0	0	0
Atp6v1g3	0	0	0	0	0	0
Nek7	0.884177	0.769207	1.15794	0.711088	0.183929	0.533456
Gm28501	0.00914589	0	0	0	0	0.0598788
Gm5833	0	0.358307	0	0	0	0
Lhx9	0.0516868	0	0	0	0	0
2310009B15Rik	0.348431	0.0381746	0.0665619	0.0974206	0.223969	0.25125
1700019P21Rik	0	0	0	0	0	0
Dennd1b	0.507903	1.15422	1.1826	0.591982	0.161991	1.27139
4930596I21Rik	0	0	0	0	0	0.0454256
Crb1	0	0	0	0	0	0
4933436E23Rik	0	0	0	0	0	0
Gm34816	0.00583724	0.237857	0.60745	0.0343572	0	0
Zbtb41	0.0195038	0	0.546896	0.0704594	0.095719	0
Aspm	0.152422	0	0.140797	0	0.0478595	0.32076
F13b	0	0	0	0	0	0
Cfhr1	0	0	0	0	0	0
Cfhr4	0.0141659	0	0	0.0262724	0	0
Cfhr2	0	0.355579	0	0.0705706	0	0
Cfh	0.226654	7.11596	0	1.52769	0	3.42603
Kcnt2	0.0354918	2.62364	0.108859	0.0171786	0	0
4930590L20Rik	0	0	0	0	0	0
Cdc73	0.14397	1.02447	0.790794	0.242285	0	0.33563
B3galt2	0	0	0	0	0.217694	0
Glrx2	0.473014	0	0.183066	0.352322	0.380651	0.212247
Ro60	0.119343	0	0	0.143425	0.0979729	0
Uchl5	0.520572	1.06666	0.30792	0.305338	1.43405	0.30212
Gm29170	0.0880359	0	0	0	0	0
Rgs2	1.35571	2.91801	0.384084	15.0367	5.73316	8.80719
Rgs13	0.0141659	0.629882	0	0	0	0
Rgs1	0.267408	0.60453	0.183066	7.36219	0.369001	0.896609
Rgs21	0	0	0	0	0	0
Rgs18	0.109134	0.254647	0.17574	0.264944	0	0.363374
Gm29514	0	0	0	0	0	0
Brinp3	0	1.40325	0	0	0	0.0500681
A230059L01Rik	0.109974	0	0.0665619	0.0356125	0	0
Gm15584	0.0608991	0	0	0	0	0
Gm29515	0	0	0	0	0	0
Gm29020	0	0	0	0	0	0
Gm29398	0	0	0	0	0	0
Pla2g4a	0.0824987	0	0	0.240798	0	0.194535
Ptgs2os	0.018446	0	0	0	0	0
Ptgs2	0.0273332	0	0	0.191662	0	0
Ptgs2os2	0	0	0	0	0	0
Pdc	0	0	0	0	0	0
2310030A07Rik	0	0	0	0	0	0
Odr4	0.244436	0.119256	0.362167	0.311091	0.591834	0.0545786
Tpr	2.15983	1.43996	3.50272	1.81255	1.6259	2.45211
Prg4	0	0	0	2.21241	0	0.0478803
Hmcn1	0	0	0.329768	0.0556924	0	0
Gm20631	0.014233	0	0	0.0197777	0	0
Gm29188	0	0	0	0	0	0
C730036E19Rik	0	0	0	0	0	0
Gm47985	0	0	0	0	0	0
Gm8947	0	0	0	0	0	0
Gm47995	0	0	0	0	0	0
3110040M04Rik	0	0	0	0	0	0
Gm47996	0	0	0	0	0	0
Gm10138	0.00583724	0	0.0665619	0.0975001	0	0.106245
Ivns1abp	0.875376	0.585644	0.605826	0.476933	0.472374	0.859534
Swt1	0.420484	0.392359	1.14808	0.366884	0.915942	0.246985
Trmt1l	0.479648	0.586972	1.01334	0.530409	0.529917	0.297455
Rnf2	0.436248	0.314207	0.544196	0.377	0.564649	0.612374
Gm28181	0	0	0	0	0	0
Niban1	0.0759733	0.236323	0.398435	1.53706	0.519043	2.88531
2810414N06Rik	0.0331539	0	0	0.0151044	0	0
Edem3	0.29329	0.0381746	0.675692	0.205506	0.161991	0.300694
1700025G04Rik	0.263473	0	0.30792	0.30833	0.551769	0.200352
Gm28610	0	0	0	0	0	0
Tsen15	0.0918671	0	0.0363926	0	0.104134	0.0317951
Colgalt2	0	0	0	0	0	0
Rgl1	0.116383	0.648761	0	1.02527	0	0.602611
Gm15479	0	0	0	0	0	0
Gm28792	0	0	0	0	0	0
Apobec4	0	0	0	0	0	0
Arpc5	3.16443	1.92587	2.03045	7.08322	3.92201	6.27312
Ncf2	0.111082	0.595075	0.262254	5.58326	0	6.05581
Smg7	0.420222	1.30868	0.929693	0.219913	0	0.501521
Gm28791	0	0	0	0	0	0
Nmnat2	0.0334452	0	0	0.0300723	0.0478595	0.0317951
Gm28960	0	0	0	0.0482697	0	0
Lamc2	0.0546995	0	0	0	0	0
Lamc1	0.184102	1.2626	0.892456	0	0.161991	0.0478803
E330020D12Rik	0.548991	0.536119	0.790468	0.20311	1.04957	0.217903
Shcbp1l	0	0	0	0	0	0
Dhx9	0.209083	1.46418	0.447016	0.424937	1.08928	0.45807
Npl	0.0278324	0	0.253962	0.13529	0	0.148524
Rgs8	0	0	0	0	0	0
Gm29529	0	0	0	0	0	0
C230024C17Rik	0	0.358307	0	0	0	0
Rgs16	0.0415992	0	0	0	0	0
Gm28513	0.0230606	0	0	0	0	0
Rnasel	0.0665941	0.0381746	0.586237	0.423066	0.270838	0.730804
Gm28512	0	0	0	0	0	0
Rgsl1	0	0	0.0363926	0	0	0.0454256
Teddm2	0.0455829	0	0	0.0497854	0.208268	0.0223043
Teddm1b	0	0	0	0	0	0
Teddm1a	0	0	0	0	0	0
Glul	1.49203	2.60757	1.76271	1.66937	1.31647	3.79698
Gm29290	0	0	0	0	0	0
Gm29291	0	0	0	0	0	0
Gm28286	0	0	0	0	0	0
A830008E24Rik	0	0.518726	0	0	0	0
Zfp648	0	0	0	0	0	0
4930452N14Rik	0	0	0	0	0	0
4930532M18Rik	0	0	0	0	0	0
Cacna1e	0.0631768	2.27924	2.55556	0.105052	0.104134	0.154321
Gm29282	0.0475326	0	0	0.0788171	0	0
Gm9530	0.014233	0	0	0.0545947	0	0.118053
Ier5	0.686806	1.38282	2.08193	5.34329	1.33221	3.71463
Mr1	0.197347	0.358307	0.108859	0	0	0
Stx6	0.618911	1.294	0.583617	0.268705	0.312034	0.133527
BC034090	0	0	0	0	0	0
Gm37622	0	0	0	0	0	0
Xpr1	0.330659	0.144328	1.04901	0.681551	0.108847	0.623104
Gm5532	0	0	0	0	0	0
Acbd6	0.999519	0.0381746	0.103599	0.108487	0.748711	0.137164
Lhx4	0.018757	0	0	0	0	0
Qsox1	0.482018	0	0	0.0240917	0.408927	0.492416
Gm37571	0	0	0	0	0	0
Cep350	0.662645	1.00923	1.85309	0.510483	0.415724	1.14385
Tor1aip1	0.602298	0.929477	0.898229	1.93155	0.587838	2.99398
Tor1aip2	0.369122	0.742242	1.08731	0.408295	0.295996	0.547588
Fam163a	0	0	0	0	0	0
Tdrd5	0.135831	0.315624	0	0	0	0
4930518J20Rik	0	0	0	0	0	0
Nphs2	0	0	0	0	0	0
Axdnd1	0.0230606	0	0	0.0117538	0	0.106245
Gm2000	16.5619	6.42485	5.21982	7.56235	13.2591	3.51434
Soat1	0.471219	0.904557	0.0679879	1.32979	0.0478595	1.5701
Abl2	0.248585	0.640614	1.5974	0.358284	0.103766	1.42915
Tor3a	0.197906	0.0381746	0.228308	1.2297	0	0.760069
Fam20b	0.0740111	0.0679787	0.177166	0.201817	0.0478595	0.462794
Ralgps2	0.578269	0.591176	5.99422	0.0598841	0.606399	0
Angptl1	0.0283317	0.472646	0	0	0	0
4930439D14Rik	0	0	0	0	0	0
Gm28694	0.220627	0	0	0	0	0
Tex35	0	0	0	0	0	0
Rasal2	0.0898338	0.25736	0.452071	0	0	0.0975181
Cryzl2	0.197566	0	0	0.0164331	0.0750818	0
Gm15486	0	0	0	0	0	0
Sec16b	0.0141659	0	0	0	0	0
Brinp2	0	0	0	0	0	0
Astn1	0	0	0	0	0	0
Gm37679	0	0	0	0	0	0
Pappa2	0	0	0	0.130659	0	0
1600012P17Rik	0	0	0	0	0	0
4930562F17Rik	0	0	0	0	0	0.0223043
Cop1	0.289464	1.11941	0.803784	1.74528	0	0.900109
Tnr	0.396852	0	0	0	0	0
Gm10530	0	0	0	0	0	0
Gm38039	0	0	0	0	0	0
Gm37294	0	0	0.140797	0	0.0750818	0
4930523C07Rik	1.1339	2.12832	4.25001	0.517918	1.25648	0.63628
4930562F07Rik	0	0	0	0	0	0
Tnn	0.0295603	0	0	0	0	0
Mrps14	1.72954	0.514245	0.621958	1.36489	1.48416	0.826141
Cacybp	0.982398	0.144328	0.207335	0.662101	0.247344	0.341656
Rabgap1l	1.63681	2.21752	5.78602	0.869043	0.859418	0.454896
Gm36975	0.0141659	0.87034	0	0	0	0.0742622
Gm37529	0	0	0	0	0	0
Gpr52	0	0	0	0	0	0
Gm37328	0	0	0	0	0	0
Gm37083	0	0	0	0	0	0
Gm38060	0	0	0	0	0	0
Rc3h1	0.519584	1.43044	0.376454	0.507999	0.516752	0.498541
Serpinc1	0.018216	0	0	0	0	0
Zbtb37	0.0392824	0.218838	0.154233	0.0590831	0.104134	0
Gm37362	0	0	0	0	0	0
Gas5	7.35077	4.00508	5.74531	1.99914	7.25145	2.59373
Dars2	0.246686	0.349883	1.38	0.332218	0.520436	0.134521
Gm37634	0	0	0	0	0	0
Cenpl	0.240884	0.32438	0	0.0273299	0.287157	0.171101
Klhl20	0.0870917	0	0.0727852	0.171976	0	0.0830649
Ankrd45	0	0	0	0	0	0
Tex50	0	0	0	0	0	0
Prdx6	2.61575	0.689635	0.17719	1.03006	1.3531	0.971674
Tnfsf4	0.0321062	0	0	0.0171786	0	0
Tnfsf18	0	0	0	0.00888093	0	0
Fasl	0.139756	0	0.382731	0	0.0979729	0
Suco	0.401892	0.996457	0.245178	0.636596	0.0979729	0.396208
Gm31925	0	0	0	0	0	0
4930558K02Rik	0.0752004	0	0	0	0	0
Pigc	0.0643072	0	0	0.0108997	0.292783	0.265801
Gm38304	0	0	0	0.0715847	0.42107	0.0746422
Dnm3	0	0	0.399718	0.110043	0.104134	0
2810442N19Rik	0	0	0	0.0180633	0	0
Dnm3os	0	0	0	0	0	0
Eef1aknmt	0.03386	0	0	0.0164331	0	0.0545786
Vamp4	0.513721	0.925834	0.750182	1.73617	0.848748	1.04255
Myoc	0	0	0	0	0	0
Myocos	0	0	0	0	0	0
Prrc2c	3.03711	2.05771	2.90391	1.11773	1.57858	1.21304
Fmo4	0	0	0	0	0	0
Fmo1	0.0930053	0.357769	0	0	0	0
Fmo2	0	1.42889	0	0	0	0
Fmo6	0	0	0	0	0	0
Fmo3	0	0	0	0	0	0
Gm37273	0	0	0	0	0	0
Mroh9	0	0	0	0	0	0
Prrx1	0.0182332	0	0	0	0	0
Gm20471	0	0	0	0	0	0
Gorab	0.0640298	0	0	0.22338	0	0.0223043
Gm29500	0	0	0	0	0	0
Mettl11b	0	0	0	0	0	0
Kifap3	0.0483348	0.236323	0.997058	0.130193	0.161991	0.268212
Scyl3	0.146743	0	0.154233	0.0777804	0.0478595	0.223755
BC055324	0.0510192	0	0	0	0	0
Mettl18	0.021803	1.09419	0.774841	0.00755221	0.108847	0.0478803
Sele	0	0	0	0.106797	0	0
Sell	2.16365	1.7004	1.69624	1.75764	2.49989	2.87647
Selp	0.183503	0.357769	0	0.169102	0	0.154321
Gm16587	0	0	0	0.0140918	0	0
Gm16548	0	0	0	0	0	0
F5	0.0273332	2.59363	0	0.56255	0	0.388918
Slc19a2	0	0	0	0	0	0
Ccdc181	0.121449	0.0679787	0.108859	0	0	0.0599436
Blzf1	0.134502	0	0.222221	0.0930147	0	0
Nme7	0.163869	0	0.0679879	0.0433446	0	0.0818632
Atp1b1	0.689831	0.254647	1.5732	0	0.329355	0
Gm32391	0	0	0	0	0	0
Gm26685	0	0	0	0	0	0
Gm37754	0	0	0	0	0	0
Gm37853	0	0	0	0.0940305	0.518828	0
Gm37184	0	0	0	0	0	0
Gm36945	0	0	0	0	0	0
Dpt	0.656394	1.97378	0	0.0108997	0	0
Gm32569	0.0230606	0	0	0	0	0
Gm20743	0	0	0	0.0140918	0	0
Xcl1	0.57066	0	0	0.023862	0.300327	0
1700029M03Rik	0	0	0	0	0	0
4930568G15Rik	0.0230606	0	0	0	0	0
Tbx19	0.0384491	0	0	0	0	0.0223043
Sft2d2	0.41867	0.0381746	0.440254	0.497236	0.367865	0.850652
Tiprl	0.523265	0	0.151863	0.273716	0.764782	0.185856
Gm38190	0	0	0	0	0	0
Gpr161	0	0	0	0	0	0
Dcaf6	0.209813	1.36745	0.256496	0.438282	0.223969	0.429264
Gm37864	0	0	0	0	0	0
Mpc2	1.15977	0.370499	0.140773	1.50807	1.11771	0.987148
Adcy10	0	0.358307	0.0363926	0	0	0
Gm38325	0	0	0	0	0	0
Mpzl1	0.128884	0.236323	0.538043	0.0791108	0	0
Rcsd1	2.6557	4.21222	4.55107	2.1181	1.62559	1.18742
Gm37073	0	0	0	0	0	0
Creg1	0.5669	0.695915	0.0540238	4.3716	0.776042	2.61896
Gm36972	0	0	0	0	0	0
Gm16565	0.0295603	0	0	0	0	0
Cd247	5.29795	3.3193	2.04269	0.103586	3.07845	0
Gm37469	0	0	0	0	0	0
Pou2f1	0.333885	0.537062	1.02573	0.274519	0.161991	0.171688
Gm26665	0.197566	0	0	0	0.292783	0.176625
Gm37923	0	0	0	0	0	0
Dusp27	0	0	0.0679879	0	0	0
Gpa33	0	0	0	0	0	0
Mael	0	0	0	0	0	0
Ildr2	0.0364663	0	0	0	0	0.148524
5330438I03Rik	0	0	0	0	0	0
Gm15853	0	0	0	0	0	0
Tada1	0.241814	0	0.421121	0.0803408	0.853017	0.0821831
Pogk	0.0354918	0	0.308466	0.129593	0	0.0478803
Gm4846	0	0	0	0	0	0
Gm4847	0	0	0	0	0	0
Fmo9	0	0	0	0	0	0
Gm16701	0	0	0	0	0	0
Gm16701.1	0	0	0	0	0	0
Fam78b	0	0	0	0.106749	0	0.108199
Uck2	1.00676	0.301577	0.933311	0.608519	0.193692	0.111222
Gm37982	0	0.358307	0	0	0	0
Gm2453	0	0	0	0	0	0
Tmco1	0.891809	0.0679787	0.69424	1.45447	1.29414	0.616788
Aldh9a1	0.255846	0	0.403427	0.373587	0.103766	0.765927
Mgst3	0.239468	0	0.0314081	0.183638	0	0.0598788
Lrrc52	0	0	0	0	0	0
Rxrg	0	0	0	0	0	0
Lmx1a	0	0	0	0.155621	0	0
Gm20711	0	0	0	0	0	0
Pbx1	0.0820327	0.477025	0	1.94756	0	2.77672
Gm37839	0	0	0	0	0	0
Nuf2	0.2177	0.196367	0	0	0.340642	0
Rgs5	0	0	0	0	0	0
Rgs4	0	0	0	0	0	0
Ccdc190	0	0	0	0.0345066	0	0
Gm15852	0	0	0	0	0	0
Hsd17b7	0.140477	0	0	0.0545947	0	0.0223043
3110045C21Rik	0.0182332	0	0	0	0	0
Ddr2	0.0911658	0.512033	0	0	0	0.0376393
Uap1	0.204762	0.0679787	0.520059	0.269603	0	0.253843
Gm37748	0	0	0	0	0	0
Gm37502	0	0	0	0	0	0
Uhmk1	0.190324	0.354795	0.145896	0.142282	0.104134	0.30883
4930500M09Rik	0	0	0	0	0	0
Sh2d1b2	0	0	0	0	0	0
Sh2d1b1	0	0.254647	0	0.664451	0.0750818	0.327844
Gm7694	0	0	0	0.0108997	0	0.0376393
Nos1ap	0.0240704	0.56872	0.765462	0.501703	0.0750818	0.539996
Spata46	0	0	0	0	0	0
Olfml2b	0.0729327	0.98689	0	0	0	0
Atf6	0.181187	0.305836	0.251241	0.601764	0	2.13178
Gm9929	0.197566	0	0	0	0	0
Dusp12	0.21351	0	0.154233	0.0887656	0.223969	0.0957607
Gm26620	0	0	0	0	0	0
Fcrlb	0	0	0	0	0	0
Fcrla	0.130702	0.348264	1.02199	0.375997	0	0.0907274
Fcgr2b	0.175599	0.0763493	0.793009	5.32966	0	4.28151
Gm38204	0	0	0	0.0302064	0	0
Gm10522	0	0	0.176847	0	0	0
Fcgr4	0.0321062	0	0	3.06296	0	2.63282
Fcgr3	0.349448	0	0	7.77934	0	8.50559
Cfap126	0	0	0.0363926	0.0180633	0	0.111222
Sdhc	1.44886	0	0.108859	1.01917	1.41514	0.540211
Mpz	0	0	0	0	0	0
Pcp4l1	0.0273332	0	0	0	0	0
Nr1i3	0	0	0	0	0	0
Tomm40l	0.244462	0.254647	0.358732	0.349488	0.0478595	0.122143
Apoa2	0	0	0	0	0	0
Fcer1g	0.490741	2.16913	0.707695	26.7038	1.6518	19.8543
Ndufs2	1.7154	0.615193	0.853846	0.783967	1.93771	1.09899
Adamts4	0	0	0	0	0	0
B4galt3	0.115527	0	0.447609	0.225504	0.212613	0.4588
Ppox	0.135715	0.0763493	0.220104	0.0935594	0.108847	0.298831
Usp21	0.231618	0.309199	0.220795	0.201258	0.480097	0
Ufc1	0.63813	0.0381746	0.140637	0.502866	0.613696	0.473453
Gm20045	0	0	0	0.0349914	0	0
Dedd	0.204898	0	0	0.159011	0.450676	0.353055
Nit1	0.379827	0.539435	0.104381	0.0493249	0.397024	0.111471
Pfdn2	0.926003	0.106153	0.280446	0.567871	0.854821	0.693761
Klhdc9	0	0	0	0	0	0
Nectin4	0	0	0	0	0	0
Arhgap30	0.798119	1.49399	2.54871	1.34405	1.22543	2.12794
Usf1	0.685882	0.114524	0.0370374	0.592778	0.647488	0.448425
Tstd1	0.0631768	0	0.0363926	0	0	0.0478803
F11r	0.0136666	0	0	0.378693	0	0.0376393
B930036N10Rik	0.0353976	0	0.358732	0.0972765	0.095719	0
Alyref2	0.162067	0	0.0679879	0.279141	0.161991	0.134847
Itln1	0	0	0	0	0	0
Cd244a	0.0448449	0.0763493	0.917325	0.938976	0.225246	2.32379
Ly9	0.650666	0.768396	0.843892	0.584693	0.57671	0.128362
Slamf7	0	0	0.225861	0.810223	0	0
Gm37787	0	0	0	0	0	0
A630035G10Rik	0	0	0	0	0	0.0598788
Cd48	2.66915	2.59244	1.4556	2.38347	3.96276	3.24365
Slamf1	0.202151	0	0.0679879	0	0.243805	0
Cd84	0.509048	0.577609	1.08521	1.37952	1.16183	1.76221
Gm10521	0	0	0	0	0	0
Gm37065	0.338735	0	0	0.0593331	0.247713	0
Slamf6	1.00299	1.25427	0.990921	0	0.566798	0
Vangl2	0.178037	0.509295	0	0	0	0
Nhlh1	0	0	0	0	0	0
Ncstn	0.473237	0.627699	0.762344	0.56588	0.195946	0.825732
Copa	0.278886	1.57977	1.34154	0.472339	0.675368	0.272537
Gm37756	0	0	0	0	0	0
Pex19	0.545274	0.732909	0.687694	0.235984	0.395799	0.289301
Dcaf8	0.442185	0.302521	0.914895	0.331897	0.279648	0.107759
Pea15a	0.241919	0.218838	0.712368	0.290392	0.553882	0.88897
Casq1	0	0	0	0	0	0
Gm17224	0	0	0	0	0	0
Atp1a4	0	0	0	0	0	0
Gm37950	0	0	0	0	0	0
Igsf8	0.400433	0.629882	0.456869	0.373138	0.30687	0.261694
Atp1a2	0	0	0	0	0	0
Kcnj9	0	0	0	0	0	0
Gm36937	0	0	0	0	0	0.0545786
Kcnj10	0	0	0	0	0	0
Pigm	0.0379993	0.0679787	0.225263	0.0760524	0.0478595	0.358009
Slamf9	0	0	0.0665619	0.479411	0	0.532358
Igsf9	0	0	0	0.161763	0	0.0317951
Tagln2	2.54508	1.64233	3.7346	3.98553	5.26804	5.77122
Cfap45	0	0	0	0	0	0.308642
4933439K11Rik	0.0184447	0	0.0679879	0.0140918	0	0.0972073
Vsig8	0	0	0	0	0	0
Slamf8	0	0	0	0.368765	0	0.135222
Fcrl6	0	0	0	0	0	0
Dusp23	0.24262	0	0.0727852	0.0478655	0.223969	0.127556
Crp	0	0	0	0	0	0
Apcs	0	0	0	0	0	0
Olfr16	0	0	0	0	0	0
Olfr1408	0	0	0	0	0	0
Olfr1406	0	0	0	0	0	0
Olfr218	0	0	0	0	0	0
Olfr1404	0	0	0	0	0	0
Fcer1a	0	0	0	0	0	0
Olfr418	0	0	0	0	0	0
Mptx2	0	0	0	0	0	0
Ackr1	0.0182332	0	0	0	0	0
Cadm3	0.0364663	0	0	0	0	0
Aim2	0.0668903	1.03761	0.659431	0.83391	0	0.637235
Ifi206	1.2643	1.11676	1.13444	0.121248	1.30283	0.51954
Ifi214	0.182112	0.543218	0.591994	0.042956	0.306241	0.136277
Ifi213	0.730549	0	0.609566	0.322162	0.587838	0.255769
Ifi209	0.622719	0.545856	0.956197	0.870273	0.593999	0.978789
Ifi208	0.591987	0.437675	0.406893	0.0171786	0.917096	0.112918
Ifi207	0.147829	0	0.839679	1.8287	0	1.45965
Ifi204	0.109399	0	0	1.87673	0	2.68958
Mndal	2.626	3.81753	5.55207	1.12667	1.67278	2.33891
Ifi211	0.0364663	0	0	0.823883	0	1.08788
Ifi203	0.941887	0.242111	2.94779	0.832602	2.46592	1.4461
Ifi202b	0	0	0	0	0	0
Ifi205	0.0182332	0	0.0363926	0.860306	0	0.423266
Olfr433	0	0	0	0.0545947	0.0750818	0
Olfr432	0	0	0	0	0	0
Olfr430	0	0	0	0	0	0
Olfr429	0	0	0	0	0	0
Olfr427	0	0	0	0	0	0
Olfr231	0	0	0	0	0	0
Olfr424	0	0	0	0	0	0
Olfr420	0	0	0	0	0	0
Spta1	0	0	0	0	0	0.0500681
Olfr419	0	0	0	0	0	0
Mptx1	0	0	0	0	0	0
Olfr417	0	0	0	0	0	0
Olfr248	0	0	0	0	0	0
Olfr414	0	0	0	0	0	0
Olfr220	0	0	0	0	0	0
Fmn2	0.116328	1.3465	0	0	0	0
Grem2	0	0	0	0	0	0
Rgs7	0.0512847	0	0	0	0	0.106245
Gm36307	0	0	0	0	0	0
Fh1	0.546562	0.0679787	0	0.135427	0.0979729	0.515482
Kmo	0.0230606	1.03586	0.507456	0.159545	0	0
Opn3	0.0230135	0	0.0363926	0.0633202	0.0478595	0
Chml	0	0	0	0.0545947	0	0.0317951
Wdr64	0	0	0	0	0	0
Exo1	0.0149831	0	0.15396	0.0117538	0.095719	0
Becn2	0	0	0	0	0	0
Pld5	0	0	0	0.228061	0	0
Rbm8a2	0.0273498	0	0	0	0	0
Gm38101	0	0	0	0	0	0
Gm36536	0	0	0	0	0	0
Cep170	0.0514151	0	0.926981	0.612964	0	0.594844
Gm36992	0	0	0	0	0	0
Sdccag8	0.326609	1.66329	1.30928	0.602233	0.0750818	1.16196
Gm15423	0	0	0	0	0	0
Akt3	0.513394	1.35702	0.970901	0.367388	0.367865	0.744356
Gm26801	0	0	0	0.0248927	0	0
Zbtb18	0.069014	0	0.35567	0.0619072	0.0478595	0.0742622
Gm29856	0	0	0	0	0	0
Gm37306	0	0	0	0	0	0
Gm37280	0	0	0	0	0	0
2310043L19Rik	0	0	0	0	0	0
1700016C15Rik	0	0.358307	0	0	0	0
Adss	0.5279	0.784763	1.05594	0.124195	0.59494	0.435282
Catspere1	0	0	0	0	0	0
Catspere2	0	0.358307	0	0.0328304	0	0
Desi2	0.457057	1.81867	0.814893	0.58425	0.398053	0.261135
B230369F24Rik	0.0230606	0	0	0	0	0
Cox20	2.05422	0.196367	0.322618	0.616716	1.61435	0.96167
Hnrnpu	3.61408	2.71872	4.10285	2.60683	2.78659	1.96991
Efcab2	0.0549537	0.987748	0.154233	0.30406	0	0.0768829
Kif26b	0.0512847	0.218838	0	0	0	0
Gm16564	0	0	0	0	0	0
Smyd3	0.497208	0.660774	2.12116	0.377186	0.663398	0.859272
Tfb2m	0.111928	0.114524	0.384084	0.0281869	0	0.0907274
Cnst	0.0336697	0.237857	0.990186	0.054965	0.0478595	1.10264
Sccpdh	0.028466	0	0	0.00755221	0.0750818	0
Kif28	0.0321594	0	0	0.247838	0	0.0317951
Ahctf1	0.110182	0.0679787	0.818007	0.185539	0.547056	0.488765
Gm10518	0	0	0	0	0	0
Cdc42bpa	0	0.629882	0.0169863	0.0361266	0	0
Coq8a	0.074315	0	0	0.0217993	0	0
Gm37336	0	0	0	0	0	0
Psen2	0.261556	0.276032	0.142063	0.480377	0.474145	0.121829
Gm31728	0	0	0	0	0	0
Itpkb	0.511338	1.0812	1.7349	0.871222	0.975501	0.567636
Stum	0	0.358307	0	0.0328304	0	0
Gm37267	0	0	0	0	0	0
Parp1	0.428865	0.0679787	0.286025	0.120204	0.0478595	0.143641
Lin9	0.4101	0.315624	0	0.0197806	0	0.657166
Mixl1	0	0	0	0	0	0
Acbd3	0.237921	0.345417	0.709994	0.185388	0.526088	0.666131
Gm37768	0.0136666	0	0	0	0	0
Gm38293	0.025442	0	0	0	0	0
H3f3a	11.2335	5.83004	7.25064	13.3379	10.589	12.2392
H3f3aos	0	0	0	0	0.150164	0
Sde2	0.425152	0	0.238934	0.300315	0.939074	0.308642
Lefty2	0	0	0	0	0	0
Pycr2	1.21275	0.218838	0	0.143804	0.225221	0.338607
Lefty1	0.0487256	0	0	0	0	0
Tmem63a	0.0688654	0	0	0.106578	0.223969	0.370828
2210411M09Rik	0	0	0	0	0	0
Ephx1	0.541679	1.43915	0.210051	0.0893466	0.404068	0.354027
9130409I23Rik	0	0	0	0	0	0
Gm37406	0	0	0	0	0	0
Nvl	0.287569	0	1.07547	0.17534	0.387236	0.11486
Cnih4	0.529629	0.556901	0.206554	0.940377	1.62969	0.587388
Wdr26	0.746673	1.14267	1.75285	2.41931	0.692545	1.50366
A430110L20Rik	0	0	0	0	0	0
Cnih3	0.0233789	0	0.199533	0.180838	0.150139	0
Ccdc121	0	0	0	0	0	0
Dnah14	0	0	0.167567	0.0240917	0	0
Lbr	1.09466	1.10783	1.50894	0.672481	0.56994	0.693549
Gm5533	0.018446	0	0	0	0	0
Enah	0.158593	0.254647	0	0	0	0
Srp9	1.44215	0.174132	0.855661	0.877947	1.41972	0.948897
Vmn1r1	0	0	0	0	0	0
Degs1	0.650176	0.620398	0.606881	1.04786	1.21674	1.10033
1700047M11Rik	0	0	0	0.0140918	0	0.25034
Fbxo28	0.250045	0.301577	0.225937	0.268552	0.0750818	0.663823
Trp53bp2	0.0770929	0.0679787	0	0.0525699	0	0.199885
Capn2	0.354074	0.312672	0.340118	0.639534	0.34611	0.69953
Gm37885	0	0	0	0	0	0
Capn8	0.0136666	0	0	0	0	0.0478803
Gm37218	0	0	0	0	0	0
Ccdc185	0	0	0	0	0	0
Susd4	0	0	0	0	0	0
Tlr5	0	0	0	0.0302064	0	0
Disp1	0.473002	0.0679787	0.444959	0.214678	0.292783	0.0223043
Brox	0.308569	0.745214	0.681818	0.213221	0.0478595	0.120704
Aida	0.208309	3.38033	0.316198	0.203289	0.104134	0.710847
Mia3	0.373625	0.952951	2.25964	0.576597	0.598104	0.979017
Taf1a	0.129845	0.271025	0.741904	0.0184519	0.161991	0.100004
Gm37986	0	0	0	0	0	0
Hhipl2	0.0580725	0	0	0	0	0
Gm37214	0.03386	0	0	0	0.0478595	0
Gm33973	0	0	0	0.555556	0	0
Gm34068	0	0	0	0	0	0
Gm38108	0	0	0	0	0	0
Dusp10	0.467621	1.71836	1.10298	0	0.173055	0.0223043
1700056E22Rik	0.0364663	0	0	0	0	0
Gm37223	0	0	0	0	0	0
Gm37712	0	0	0	0	0	0
1700112H15Rik	0	0	0.0164772	0	0	0
Gm37800	0	0	0	0.0197777	0	0
4930488B22Rik	0	0	0	0	0	0
Hlx	0.0141659	0	0	0.180541	0	0.530095
Gm34342	0	0	0	0.0975001	0	0
Mtarc1	0	0	0.444645	0	0	0
Mtarc2	0.966633	0.473485	0.749368	0.713088	0.723109	0.461973
C130074G19Rik	0	0	0	0	0	0
Mark1	0	0	0	0	0	0
Gm38251	0	0	0	0	0	0
Gm34732	0	0	0	0	0	0
4930433J02Rik	0	0	0	0	0	0
Gm37662	0	0.512033	0	0	0	0
Rab3gap2	0.235829	0.369556	0.105025	0.435646	0.156707	0.410214
Gm34882	0	0	0	0	0	0
Iars2	0.286736	0.752757	0.959357	0.118635	0.529855	0
2010103J01Rik	0	0	0	0	0	0
Bpnt1	0.0554243	0.469507	0.0363926	0.0625718	0.161991	0.362017
4930532G15Rik	0.03386	0	0	0.0197777	0	0
Eprs	0.669178	0.0381746	0.0734301	0.265498	1.58289	0.707106
9630028B13Rik	0	0	0	0	0	0
Gm2061	0	0	0	0	0	0
Slc30a10	0	0	0	0	0	0
Gm38093	0	0	0	0	0.108847	0
Lyplal1	0	0	0	0	0	0
Gm37134	0	0	0	0	0	0
A730004F24Rik	0	0	0	0	0	0
Tgfb2	0	0	0	0.0845509	0	0
Gm29491	0	0	0	0	0	0
Rrp15	0.289158	0.271025	0	0.237429	0	0.0796754
A430105J06Rik	0	0	0	0.021644	0	0
1700023G09Rik	0	0	0	0	0	0
Gm37912	0	0	0	0	0	0
D1Pas1	0	0	0	0	0	0
Spata17	0	0	0	0	0	0
Gm15509	0	0	0	0	0	0
1700007P06Rik	0	0	0	0	0	0
Gpatch2	0.617562	1.01219	0.575912	0.191879	0	0.390505
Gm38155	0	0	0	0	0	0
Gm37896	0	0	0	0	0	0
Esrrg	0.0141659	0.512033	0	0.191866	0.0478595	0
Gm36388	0	0	0	0	0	0
9330162B11Rik	0	0	0	0	0	0
Gm38064	0	0	0	0	0	0
Ush2a	0.0278324	0	0.0679879	0.0812034	0	0
Kctd3	0.0461212	0	0.602838	0.409214	0	0.0428471
Kcnk2	0.313346	0	0.0363926	0.253046	0.151625	0.0223043
2900042K21Rik	0	0	0	0	0	0
A430027H14Rik	0	0	0	0	0	0
Cenpf	0.975773	0.392734	2.5095	0.0171786	0.53208	0
Ptpn14	0.122226	0.868394	0.151863	0	0	0
Gm26574	0	0	0	0	0	0
Gm37422	0	0	0	0	0	0
Smyd2	0.345685	0.514245	0	0.00755221	0.108847	0.0223043
Prox1	0.0341898	0.358307	0	0	0	0
Gm28172	0	0	0	0	0	0
Prox1os	0	0	0	0	0	0
Gm29678	0	0	0	0	0	0
Gm30725	0	0	0.154233	0	0	0
Gm30932	0	0	0	0	0	0
Rps6kc1	0	0.74989	0.0157041	0.144418	0	0.0317951
Angel2	0.533028	0.238513	0.775021	0.560346	0.199485	0.300019
Vash2	0	0	0	0	0	0
Gm31373	0	0	0	0	0	0
Flvcr1	0.11362	0	0.0370374	0.292809	0.946275	0.715099
A230020J21Rik	0	0	0.358732	0	0	0
Spata45	0.0720843	0	0	0	0.108847	0
Tatdn3	0.032399	1.03297	0.334929	0.0505922	0	0
Nsl1	0.0645746	0	0.253962	0.395358	0.143578	0
Gm38188	0	0	0	0	0	0
Batf3	0.0200031	0	0	0.312351	0	0.848693
Gm38161	0	0	0	0	0	0
Fam71a	0.0141659	0	0	0	0	0
Atf3	0.0551656	0	0.0363926	3.29152	0.0979729	0.650973
D730003I15Rik	0.132817	0	0.154233	0.243242	0.0750818	0.120253
Gm37168	0.0273332	0	0	0.0444047	0	0.074903
Nenf	0.217159	0.472646	0.108859	0.109014	0.150164	0.108678
Pacc1	0.04162	0	0.293376	0.0998903	0.292783	0
Ppp2r5a	0.691219	1.25846	1.27561	1.43646	0.193692	1.43606
Gm32200	0	0	0	0	0	0
Gm37432	0	0	0	0	0	0
Dtl	0.179308	0.392734	0.638045	0	0	0
Ints7	0.48184	0.670614	0.154233	0.131951	0.668167	0
Lpgat1	0.0786333	0.182503	2.58662	0.195657	0.223969	0.16537
Gm38037	0.021803	0	0.384084	0	0	0
Nek2	0.321613	0.196367	0.358732	0	0.095719	0
1700034H15Rik	0.00914589	0	0	0	0	0
Slc30a1	0	0	0	0.183685	0	0.0974257
Rd3	0	0	0	0	0	0
Gm26670	0.179768	0	0	0.0328304	0	0
Traf5	0.676692	1.09465	0.735675	0.547486	1.86493	0.708096
Gm26879	0	0	0	0	0	0
Rcor3	0.0136666	0.196367	0	0.151008	0.0979729	0.124284
Gm10516	0	0	0	0.148069	0	0
Kcnh1	0.128884	0	0	0.195456	0	0.199672
Hhat	0.382079	1.3465	0.209537	0.318997	0.150164	0.218057
1700065J18Rik	0	0	0	0	0	0
Sertad4	0	0	0	0	0	0
Gm15867	0	0	0	0	0	0
Syt14	0	0	0	0	0	0
Gm31406	0	0	0	0	0	0
Utp25	0.0511807	0.301577	0.151863	0.0569221	0	0
Irf6	0.0538161	0.349883	0	0	0	0
A130010J15Rik	0.0136666	0	0	0.072658	0.340642	0
Traf3ip3	1.69939	0.984073	2.43783	0.44878	1.7033	1.04986
Gm15872	0	0	0	0	0	0
4930570N18Rik	0.0253411	0	0.293376	0.0108997	0.367865	0.201507
Lamb3	0.170074	0.301577	0.0363926	0	0.293919	0
Hsd11b1	1.27279	3.36274	0.294568	0.330099	1.83315	0.385122
G0s2	0	0.218838	0	1.53251	0	0.522311
Gm37650	0	0	0	0	0	0
Camk1g	0	0	0	0	0	0
Mir205hg	0	0	0	0	0	0
4930503O07Rik	0	0	0	0	0	0
Plxna2	0.0321062	0.477025	0	0.0345066	0	0
Cd34	0.555995	3.19699	0	0	0	0
Gm16897	0	0	0.140797	0.0975001	0	0
A330023F24Rik	0.0654505	0.537118	0	0.470383	0	0.57139
Gm32250	0	0	0	0	0	0
Gm37027	0	0	0	0.0180633	0	0
Cd46	0.0182332	0	0	0.149036	0.103766	0.0742622
Cr1l	0.939937	0.436072	1.1179	0.832669	0.58343	1.86846
Cr2	0	0.378068	1.17163	0	0	0
Fam171a1	0.0880359	0	0	0	0	0
Nmt2	0.303932	1.15318	1.20605	0.214389	0.39691	0.0223043
Rpp38	0.0195038	0	0	0.0262724	0.212613	0
Acbd7	0	0	0	0	0.76193	0
Olah	0	0	0	0	0	0.074903
Gm37525	0	0	0	0	0	0
Meig1	0	0	0	0	0	0.32869
Dclre1c	0.0858557	0.956487	0.36113	0.850191	0	0.947922
Suv39h2	0.00583724	0	0.570738	0	0	0
Gm13184	0	0	0	0	0	0
Hspa14	0.458826	1.36645	2.30114	0.657513	0.398258	0.474507
Gm45902	0.0615229	0	0	0.110738	0	0.0830649
Cdnf	0	0	0	0	0	0
Fam107b	1.66569	2.40967	4.93834	1.16151	1.41646	1.00579
Gm13185	0	0	0	0	0	0
Gm13180	0	0	0	0	0	0
Gm13191	0	0	0	0	0	0
Frmd4a	0.142835	0.254647	0	0.389861	0.265554	0.337106
Gm10862	0	0	0	0	0	0
Gm38085	0	0	0	0	0	0
1700080N15Rik	0	0	0	0	0	0
Gm13189	0	0	0	0	0	0
Gm37814	0	0	0	0	0	0
Gm37107	0	0	0	0	0	0
Gm38348	0	0	0	0	0	0
Gm13187	0	0	0	0.0345066	0	0
Gm36988	0	0	0	0	0	0
Gm13175	0	0	0	0	0	0
Gm13179	0	0	0	0	0	0
Prpf18	0.20153	0.469139	0.413417	0.162857	0	0.408002
Bend7	0.00583724	0.518726	0	0	0	0
Sephs1	0.0658855	1.36521	0.373419	0.178942	0.569603	0.118053
Phyh	0.100693	0.236323	0.0370374	0.197799	0	0.457992
Ucma	0	0	0	0	0	0
Mcm10	0.153659	0	0	0	0	0.0376393
Optn	0	0	0	0	0.212981	0
4930551O13Rik	0	0	0	0	0	0
Ccdc3	0	0	0.0169863	0	0	0
Camk1d	1.0876	2.62642	4.31131	5.26424	0.564883	3.80472
Cdc123	0.850435	1.38651	0.591517	0.819967	1.06444	0.443157
Nudt5	0.433655	0	0.222221	0.0357924	0.156707	0.137852
Gm13199	0.0230606	0	0	0	0	0
Sec61a2	0.0633643	0	0.690337	0.169656	0.650928	0.403015
Gm13267	0	0	0	0	0	0
Dhtkd1	0	0	0	0	0	0
Upf2	0.603656	0.65146	0.328037	0.248257	0.245858	0.0446086
Proser2	0	0.358307	0	0	0	0
Gm10857	0	0.254647	0	0	0	0
Echdc3	0	0	0	0	0	0.106245
A230108P19Rik	0	0	0	0.0197777	0	0
Gm13383	0	0	0	0	0	0
1700014B07Rik	0	0	0	0	0	0
Usp6nl	0.124074	0	0.59049	0.212935	0.0750818	0.427833
Gm13388	0	0	0	0	0	0
Gm13391	0	0	0	0.171931	0	0
Celf2	3.0018	2.78311	4.77235	4.64193	1.11071	3.46715
Gm13389	0	0	0	0	0	0
Gm10855	0	0	0	0	0	0
Gm10115	0	0	0	0	0	0
Gm28641	0	0	0	0	0	0
Gm13211	0	0	0	0	0	0
1700061F12Rik	0	0	0	0	0	0
Gm13219	0	0	0	0	0	0
Dreg1	0.0275919	0	0	0	0	0
Gata3	1.00733	0.760887	0.768167	0	0.941781	0
Gm13256	0.0476621	0	0	0	0.0979729	0
4930412O13Rik	0	0	0	0	0	0
9230102O04Rik	0	0	0	0	0	0
Gm13262	0	0	0	0	0	0
Taf3	0.455432	0.119256	0.556452	1.0107	0.994003	0.306618
Atp5c1	3.80286	1.51457	0.26008	3.14265	5.36742	1.65534
Kin	0.745192	0.0679787	0.249628	0.0726921	0.0478595	0.514237
Itih2	0	0	0	0	0	0
Itih5	0.0902342	0	0	0.0619072	0.0750818	0
Gm13261	0	0	0	0	0	0
Sfmbt2	0	0	0	0.388701	0.104134	0
Gm13264	0	0	0	0	0	0
Prkcq	1.58351	2.70719	1.64693	0.0140918	1.60212	0
Gm38171	0	0	0	0	0	0
8030442B05Rik	0.0321062	0	0	0	0	0
Gm13293	0	0	0	0	0	0
Gm13291	0	0	0	0	0	0
Pfkfb3	0.159602	0.556901	0.104381	0.482399	0	0.351721
Gm10851	0.018216	0	0	0.094162	0	0
Rbm17	0.844437	0.843106	0.531139	0.523375	0.811721	0.626478
Gm17490	0	0	0	0	0	0
Il2ra	0.711535	0.603154	0	0	0.544235	0.261192
Il15ra	0.103617	0	0	0.162891	0	0.105304
Fbh1	0.115853	0	0	0.546284	0	0.142851
Ankrd16	0.226307	0.58774	0.19127	0.129769	0.104134	0.102459
Itga8	0.0512847	0	0	0.0180633	0	0
E030013I19Rik	0	0	0	0	0	0
Mindy3	0.520394	0.581393	0.345503	0.436539	0.380955	1.48208
Gm37565	0	0	0	0	0	0
Pter	0.146008	0.301577	0	0	0.104134	0
C1ql3	0	0	0	0	0	0
Rsu1	0.45041	0.540624	0.199533	0.884216	0.295971	0.722645
Gm13270	0	0.349883	0	0.0855227	0	0
Cubn	0.018757	0	0	0.0592731	0	0
Trdmt1	0.0944155	0.276032	0.0370374	0	0.179216	0.0223043
Vim	3.70268	4.61007	6.16821	6.43884	4.60031	15.014
St8sia6	0.0321062	0.0763493	0.781822	0.155531	0.208268	0.0669129
Gm37126	0	0	0	0	0	0
Hacd1	0.069136	0	0	0.0117538	0	0.143017
Stamos	0.00583724	0	0	0	0	0
Stam	0.173496	0.822325	0.29266	0.113706	0.151994	0
Tmem236	0	0	0	0	0	0
Mrc1	0.344572	0	0	1.67042	0	2.61723
Slc39a12	0	0	0	0	0	0
Gm13266	0	0	0	0	0	0
Cacnb2	0.282513	0.518726	0	0.0644007	0.358814	0.0545786
Gm10848	0	0	0.225861	0	0	0
Gm13269	0	0	0	0	0	0
Nsun6	0.160287	0.742617	0.640326	0.290555	0.616764	0.510257
Arl5b	0.103074	0.756583	0.294568	0.115677	0.223969	0.0954937
Malrd1	0.018757	0	0	0	0	0
Plxdc2	0.840156	3.04785	1.20621	0.580084	1.01155	0.828469
Gm13322	0	0	0	0	0	0
Nebl	1.02709	0.857802	0	0.00888093	1.06168	0
Gm13324	0	0	0	0	0	0
H2al2a	0	0	0	0	0	0
A930004D18Rik	0	0	0	0	0	0
Gm13330	0	0	0	0	0	0
Skida1	0	0	0	0	0	0
1810059C17Rik	0.046027	0	0	0	0	0
Mllt10	0.806524	3.34441	1.67466	0.973185	0.705617	1.29834
Dnajc1	0.747342	6.14891	0.884138	0.773049	1.61288	0.54071
Commd3	0.863154	0.524674	0	0.418401	0.914787	0.622371
Bmi1	0.0660972	0.0679787	0.0665619	0.0913099	0.0750818	0.0317951
Spag6	0	0	0	0	0	0
Gm3363	0	0	0	0	0	0
Carlr	0	0	0	0	0	0
Pip4k2a	0.891108	2.51736	2.75689	3.12756	0.975591	2.77026
4930426L09Rik	0.0230606	0	0	0	0	0
Armc3	0.347739	0	0.22739	0.194561	0.195946	0.442245
4930447M23Rik	0	0	0	0	0	0
Msrb2	0.254627	0.119256	0	0.0714717	0.207531	0.0478803
Gm33940	0	0	0	0	0	0
Gm13344	0	0	0	0	0	0
Ptf1aos	0	0	0	0	0	0
Ptf1a	0	0	0	0	0	0
1810010K12Rik	0	0	0	0	0	0
4921504E06Rik	0.00583724	0	0	0.0300723	0	0
Gm13348	0	0	0	0	0	0
Otud1	0	0	0.151863	0.0935087	0	0
Gm13346	0	0	0	0	0	0
Etl4	0.0956661	1.34671	0.0849742	1.91472	0.161991	0.914734
Gm17171	0	0	0	0	0	0
Gm13335	0	0	0	0	0	0
Gm13362	0	0	0	0	0	0
Arhgap21	0.0567212	0.357769	0.177166	0.216756	0.161991	0.338413
Gm13380	0.0182332	0.119256	0	0.0690131	0	0
Gm13375	0	0	0	0	0	0
Gm13376	0.0207996	0	0	0	0	0
Enkur	0	0	0.0363926	0.0361266	0	0.0908513
Thnsl1	0.0377198	0	0	0.0328304	0	0.154321
Gm13327	0	0	0	0	0	0
Gpr158	0	0	0	0	0	0
Myo3a	0.214973	1.31689	0.299291	0.135268	0	0.905759
Gad2	0	0	0	0	0	0
1700092C17Rik	0	0	0	0	0	0
Apbb1ip	1.93835	5.14314	5.0443	4.60923	2.51914	8.29166
Pdss1	0.0467764	0	0	0.0108997	0	0.44049
Abi1	3.95142	3.21267	1.5682	2.65772	1.55541	3.14633
Acbd5	0.416905	1.46035	0.690811	0.561273	0.301789	0.679594
Mastl	0.175542	0.196367	0.384084	0	0	0
Yme1l1	0.339021	0.540624	0.108859	0.581554	1.27833	0.939847
Potegl	0.021803	0	0.15396	0.0206347	0	0.118053
Nxph2	0	0	0	0.0345066	0	0
Spopl	0.0283317	1.01119	1.69616	0.282693	0	0.111901
Hnmt	0.07033	0	0	0.0971271	0	0.55056
Tbpl2	0	0	0	0	0	0
Il36b	0	0	0	0	0	0
Il36g	0	0	0	1.18788	0	3.06085
Il36a	0	0	0	0	0	0
Il36rn	0	0	0	0	0	0
Il1f10	0	0	0	0	0	0
Gm13411	0	0	0	0	0	0
Il1rn	0	0	0	3.61814	0	0.772333
Psd4	0.326117	0.106153	0.6694	0.0790033	0.253905	0.172509
Pax8	0	0	0	0	0.104134	0
Gm13415	0	0	0	0	0	0
Gm13417	0	0	0	0	0	0
Cacna1b	0.0518911	0	0	0.0108997	0	0
Ehmt1	0.421302	1.32509	1.08503	0.51962	0.463584	0.397499
Arrdc1	0.320958	1.24932	1.82359	0.218874	0.626819	0.657276
Zmynd19	0.117385	0	0	0.0996145	0	0.118053
Dph7	0.0961109	0	0.474066	0	0.0750818	0.0317951
Mrpl41	0.427438	0.333361	0.262899	0.221379	0.576724	0.344747
Pnpla7	1.53706	0.0763493	1.38204	1.45996	1.45024	1.20857
Nsmf	0.0470887	0	0	0	0.292783	0
Entpd8	0	0	0	0	0	0
Noxa1	0.00583724	0	0	0	0	0
Gm13387	0	0	0	0.00888093	0	0
Nrarp	0.0334452	0	0	0.252623	0.0478595	0
Gm38287	0	0	0	0	0	0
Tor4a	0.16577	0.271025	0.293376	0.041106	0	0.201507
Nelfb	0.603892	0.545522	0.960789	0.584477	1.49626	0.836806
Stpg3	0	0	0	0	0	0
[truncated: 30,228 more rows]
